# Supplementary material for: Monitoring correlates of SARS-CoV-2 infection in cell culture using a two-photon-active calcium-sensitive dye
Source: PubMed Central journal article supplement (PMC11264913; doi:10.1186/s11658-024-00619-0), 2024-07-19
Supplement: 11658_2024_619_MOESM1_ESM.pdf [file 11658_2024_619_MOESM1_ESM.pdf]

## Supplementary Information

for

### Monitoring correlates of SARS-CoV-2 infection in cell culture using a two-photon-active calcium-sensitive dye

Domokos Máthé<sup>a,b,c,†,\*</sup>, Gergely Szalay<sup>d,e,†</sup>, Levente Cseri<sup>e,f,†</sup>, Zoltán Kis<sup>g</sup>, Bernadett Pályi<sup>g</sup>, Gábor Földes<sup>h,i</sup>, Noémi Kovács<sup>b</sup>, Anna Fülöp<sup>f</sup>, Áron Szepesi<sup>d,e</sup>, Polett Hajdrik<sup>a</sup>, Attila Csomos<sup>f,j</sup>, Ákos Zsembery<sup>k</sup>, Kristóf Kádár<sup>k</sup>, Gergely Katona<sup>l</sup>, Zoltán Mucsi<sup>e,f,m,\*</sup>, Balázs József Rózsa<sup>d,e,l,\*</sup>, Ervin Kovács<sup>l,n,\*</sup>

<sup>a</sup>Department of Biophysics and Radiation Biology, Semmelweis University, Tűzoltó utca 37–47, H-1094 Budapest, Hungary

<sup>b</sup>In Vivo Imaging Advanced Core Facility, Hungarian Centre of Excellence for Molecular Medicine, Tűzoltó utca 37–47, H-1094 Budapest, Hungary

<sup>c</sup>HUN-REN Physical Virology Research Group, Semmelweis University, Tűzoltó utca 37–47, H-1094 Budapest, Hungary

<sup>d</sup>Laboratory of 3D Functional Network and Dendritic Imaging, HUN-REN Institute of Experimental Medicine, Szigony utca 43, H-1083 Budapest, Hungary

<sup>e</sup>BrainVisionCenter, Liliom utca 43–45, H-1094 Budapest, Hungary

<sup>f</sup>Femtonics Ltd., Tűzoltó utca 59, H-1094 Budapest, Hungary

<sup>g</sup>National Center for Public Health, Albert Flórián út 2–6, H-1097 Budapest, Hungary

<sup>h</sup>National Heart and Lung Institute, Imperial College London, Du Cane Road, W12 0NN London, United Kingdom

<sup>i</sup>Heart and Vascular Center, Semmelweis University, Városmajor utca 68, H-1122 Budapest, Hungary

<sup>j</sup>Hevesy György PhD School of Chemistry, Eötvös Loránd University, Pázmány Péter sétány 1/A, H-1117 Budapest, Hungary

<sup>k</sup>Department of Oral Biology, Faculty of Dentistry, Semmelweis University, Nagyvárad tér 4, H-1089 Budapest, Hungary

<sup>l</sup>Two-photon measurement technology group, The Faculty of Information Technology, Pázmány Péter Catholic University, Szigony utca 50/A, H-1083 Budapest, Hungary

<sup>m</sup>Institute of Chemistry, Faculty of Materials Science and Engineering, University of Miskolc, Egyetem tér 1, H-3515 Miskolc, Hungary

<sup>n</sup>Institute of Materials and Environmental Chemistry, HUN-REN Research Centre for Natural Sciences, Magyar tudósok körútja 2, H-1117 Budapest, Hungary

<sup>†</sup>These authors contributed equally to this work.

\*For correspondence: mathe.domokos@med.semmelweis-univ.hu (MD); zmuksi@femtonics.eu (ZM); rozsa.balazs@koki.hu (BJR); kovacs.ervin@ttk.hu (EK)

## Contents

---

|                                                                                                 |    |
|-------------------------------------------------------------------------------------------------|----|
| Supplementary methods .....                                                                     | 3  |
| Viral isolate and viral infection gradient plate.....                                           | 3  |
| Flow cytometry methods .....                                                                    | 3  |
| Supplementary figures and tables .....                                                          | 5  |
| ImageJ script .....                                                                             | 27 |
| Microbiological assay results.....                                                              | 29 |
| Cytotoxicity assay.....                                                                         | 29 |
| Flow cytometry measurement results .....                                                        | 30 |
| Synthetic methods and results.....                                                              | 31 |
| General synthetic methodologies and characterization.....                                       | 31 |
| Synthesis of BEEF-CP.....                                                                       | 32 |
| Synthesis of ketone 5 .....                                                                     | 32 |
| Synthesis of unprotected fluorescein derivative 6 .....                                         | 33 |
| Acylation of the fluoresceine derivative 6 .....                                                | 33 |
| <i>N</i> -acylation of amino BAPTA moiety using 3.....                                          | 34 |
| Hydrolysis of 7 using aqueous sodium hydroxide .....                                            | 35 |
| Spectroscopic characterization of BEEF-CP.....                                                  | 36 |
| Single-photon absorption and emission of BEEF-CP.....                                           | 36 |
| Determination of dissociation constant ( $K_d$ ) of fluorescent calcium indicator BEEF-CP ..... | 38 |
| pH sensitivity of the fluorescent sensor BEEF-CP .....                                          | 39 |
| Ion-selectivity of the fluorescent sensor BEEF-CP .....                                         | 40 |
| Two-photon action cross-section measurements .....                                              | 41 |
| NMR spectra of the synthesized novel compounds .....                                            | 42 |
| Supplementary data references.....                                                              | 52 |

## Supplementary methods

---

### Viral isolate and viral infection gradient plate

D614G mutant variant of the ancestral Wuhan-Hu-1 SARS-CoV-2 virus, isolated from a Hungarian patient in 4 July 2020. SARS-CoV-2 B.1.1.7 (Alpha) variant isolated from a Hungarian patient in October 2020. All experiments with the application of infective material were performed under Biosafety Level 3 (BSL-3) conditions at the National Biosafety Laboratory, National Public Health Center (Budapest, Hungary). One day prior to infection Vero E6 cells were plated in 96-well flat bottom tissue culture plates (TPP, Switzerland) in vaccine production-serum free medium (VP-SFM) until each well reached 80% confluence.

The Vero E6 cells for isolation were maintained in DMEM (Lonza, Switzerland) medium supplemented with 5% OptiClone fetal bovine serum (FBS, Euroclone, Italy) and Cell Culture Guard (PanReacApplichem, Germany). The viral titers were determined by the median tissue culture infectious dose assay (TCID<sub>50</sub>) method and calculated using the public domain code TCID<sub>50</sub> calculator v2.1 [Binder M. TCID<sub>50</sub> Calculator (v2.1-20-01-2017\_MB) [(accessed on 10 June 2020)]; available online: [https://www.klinikum.uni-heidelberg.de/fileadmin/inst\\_hygiene/molekulare\\_virologie/Downloads/TCID50\\_calculator\\_v2\\_17-01-20\\_MB.xlsx](https://www.klinikum.uni-heidelberg.de/fileadmin/inst_hygiene/molekulare_virologie/Downloads/TCID50_calculator_v2_17-01-20_MB.xlsx)].

The basic viral titer of the stock solution was calculated as  $1 \times 10^{-1} \text{ ml}^{-1}$ . Subsequently, a tenfold serial dilution was performed using the stock solution, i.e. from  $10^{-2}$  until  $10^{-6}$  TCID<sub>50</sub>, each in a final volume of 100 microliters. This volume was supplemented to a final volume of 200 microliters with VP-SFM and TCID<sub>50</sub> added to the plate wells for the viral infection calcium imaging tests in triplicate. A positive control triplicate using  $10^{-1}$  TCID<sub>50</sub> and a negative uninfected control triplicate were also plated.

The plates were incubated in a humidified 37 °C incubator at 5% CO<sub>2</sub> for forty-eight hours to allow for the cytopathogenic effects of viral replication to complete.

For imaging, the fluorescent dye solution was added to each well in 10 microliters of volume in a solution of 10 or 100 times diluted original stock (1 mg,  $10^{-6}$  mol of dye dissolved in 1 mL of ethanol, which was diluted with 9 mL of distilled water resulted in the dye in 100 μM concentration in original stock, which was diluted to 10 μM or 1 μM before added to the wells). The dye concentration in the wells were 0.5 or 0.05 μM, respectively. The supernatant was replaced after 60 minutes of incubation prior to the imaging.

### Flow cytometry methods

The flow cytometry measurement was carried out on a BD-FACSVerse instrument (BD company) including three laser sources and 8 channel in FICS channel. The HEK-293 cell line was implemented according to the generic vendor protocol at 37 °C in a humidified atmosphere with 5% CO<sub>2</sub>. The base medium for this cell line is D-MEM with 4.5 g L<sup>-1</sup> glucose. To make the complete growth medium, fetal bovine serum was added to a final concentration of 10%.

For calcium efflux measurement we used a cell suspension with  $1 \times 10^6$  cells in 1 mL HBSS (Thermo Fisher) solution. Cells were loaded with BEEF-CP dye (0.01 mL, 100 μM) or without dye at HBSS as untreated control. Cells were incubated for 45 minutes at 37 °C in a shaking incubator (500 rpm) in the dark. Cells were washed twice with DMEM with 2% FBS and resuspended in HBSS. For recovering, the cells were stored in the dark at

room temperature until about 0.5–1 hour. The samples were measured with a 3 laser, 8 channel BD FACSVerse instrument.

The baseline fluorescence was determined with untreated cells. For maximal calcium flux ratio, cells were treated with 1  $\mu\text{g}/\text{ml}$  ionomycin (Thermo Fisher) for 5 minutes and measured. For negative control cells were inhibited with EGTA. Positive control: Ionomycin, 1  $\mu\text{g mL}^{-1}$  final concentration. Negative control: EGTA 8 mM final concentration. The data were analyzed with BD FACSuite Software.

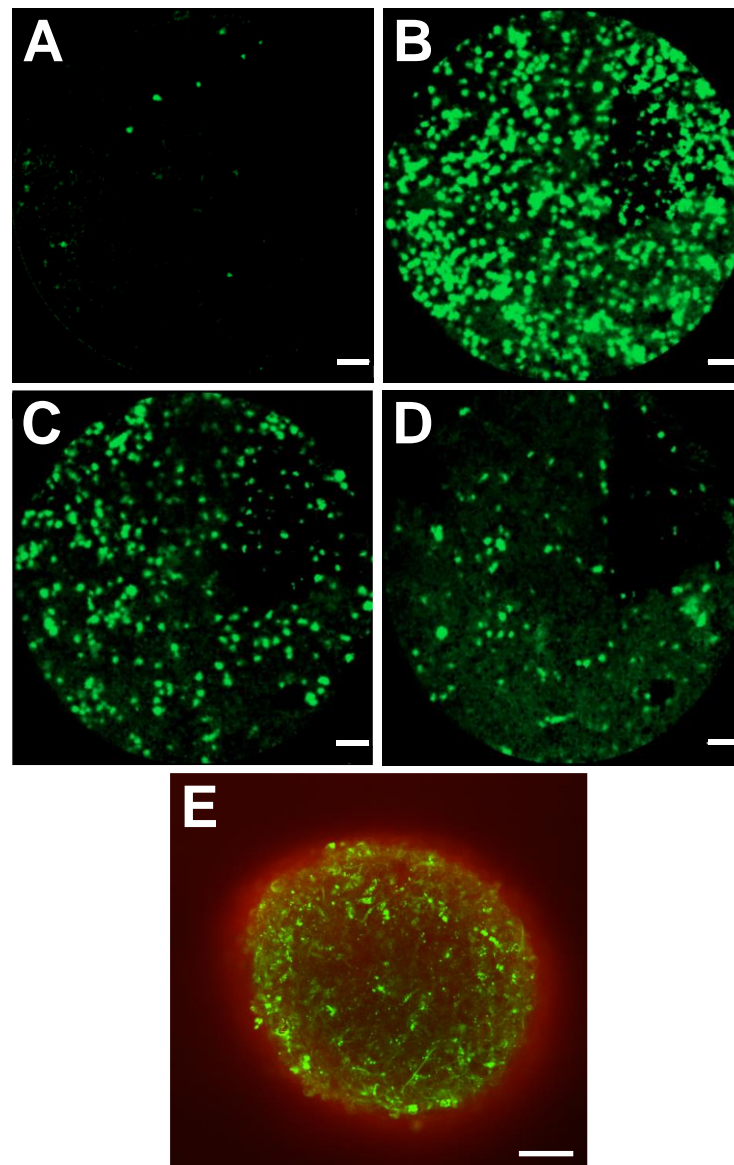

**Fig. S1. Images acquired with a Cellvizio confocal laser scanning fiber optic endomicroscope** (CellVizio Dual Band, Mauna Kea Tech Srl, Paris, France; fiberoptic dual wavelength confocal endomicroscopic system. The applied optode was the S-800 with a 800 micron field-of-view and 3 micron resolution) using the 490 nm excitation. Panels (A) and (B) show the cellular calcium response in bright green fluorescence using the novel calcium sensing dye BEEF-CP (0.05  $\mu\text{M}$ ), while (C) and (D) show the use of the dye in normal non-infected cell culture. Besides the obvious viral titer dependency of the readout calcium light response, the depth dependent changes in resolution and cellular image blurring are also emphasized when this non-3D method of imaging is applied in real-life 3D cell culture conditions. (E) Two-photon (green) and one-photon (red) images (separated by the stimulation wavelength) from the same organoid sample overlaid. One-photon signal, acquired through the two-photon detectors (with no pinhole). Scale bars (on all panels) 50  $\mu\text{m}$ .

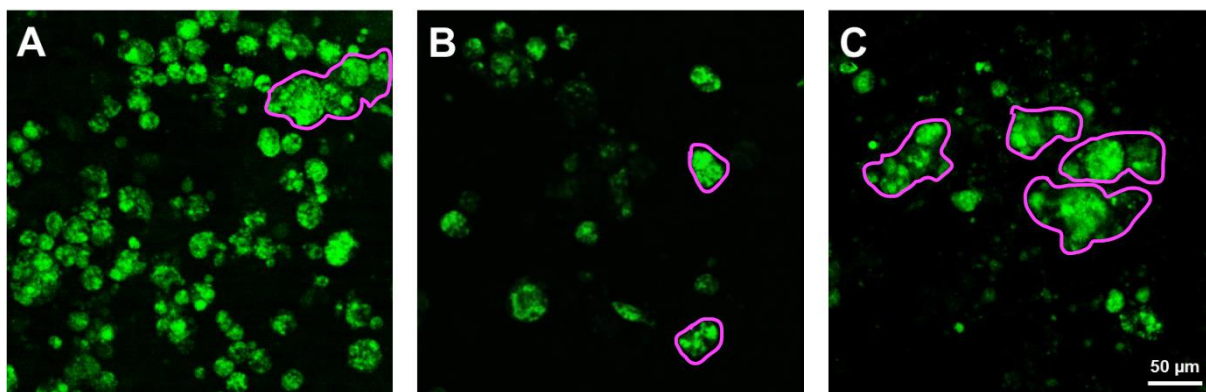

**Fig. S2. Syncytium formation.** (A-C) Examples for syncytium formation with different syncytium sizes, assumably with increasing number of contributing cells. Exemplified syncytial formations are outlined in pink.

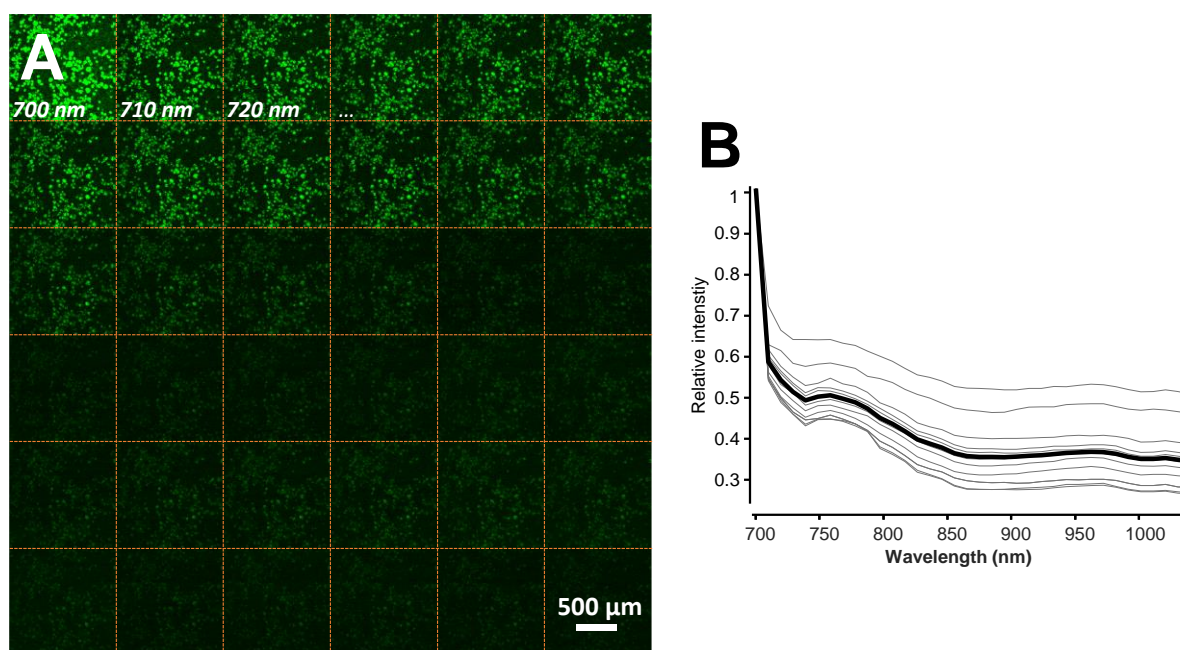

**Fig. S3. Wavelength selection.** (A) ‘Wavelength stack’, images acquired from the same imaging region without changing the laser intensity or PMTs’ setting. (B) Averaged two-photon fluorescent signal as a factor of the wavelength, as in (A). Data was pulled from hand selected image areas contains distinguishable structures. Gray lines indicate individual measurements, from different well-plates, intensity is normalized to the one measured at 700 nm. Black line indicates average of 10 measurements with a clear stimulation peak at 700 nm. This 700 nm excitation wavelength was used for all further measurements.



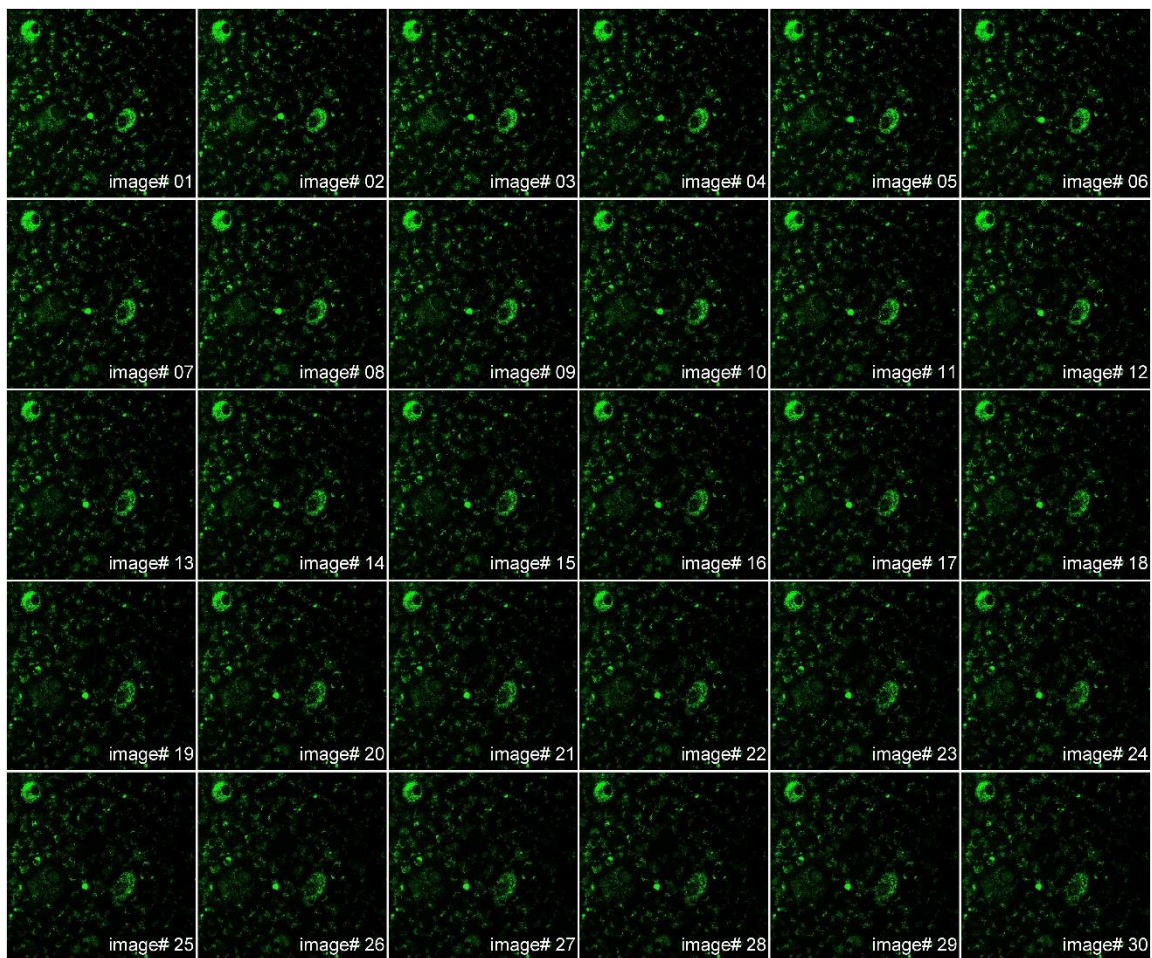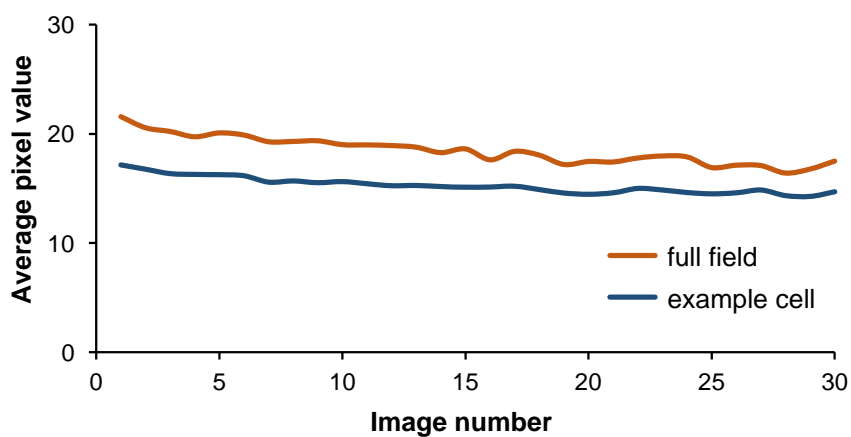

**Fig. S4. Effect of long-term imaging.** (Top panel) 30 consecutive images acquired from the same region with 30s difference, with no apparent change in the overall morphology of the cells or the culture. (Lower panel) Decrease of the average fluorescence intensity for the full field of view and for one example cell.

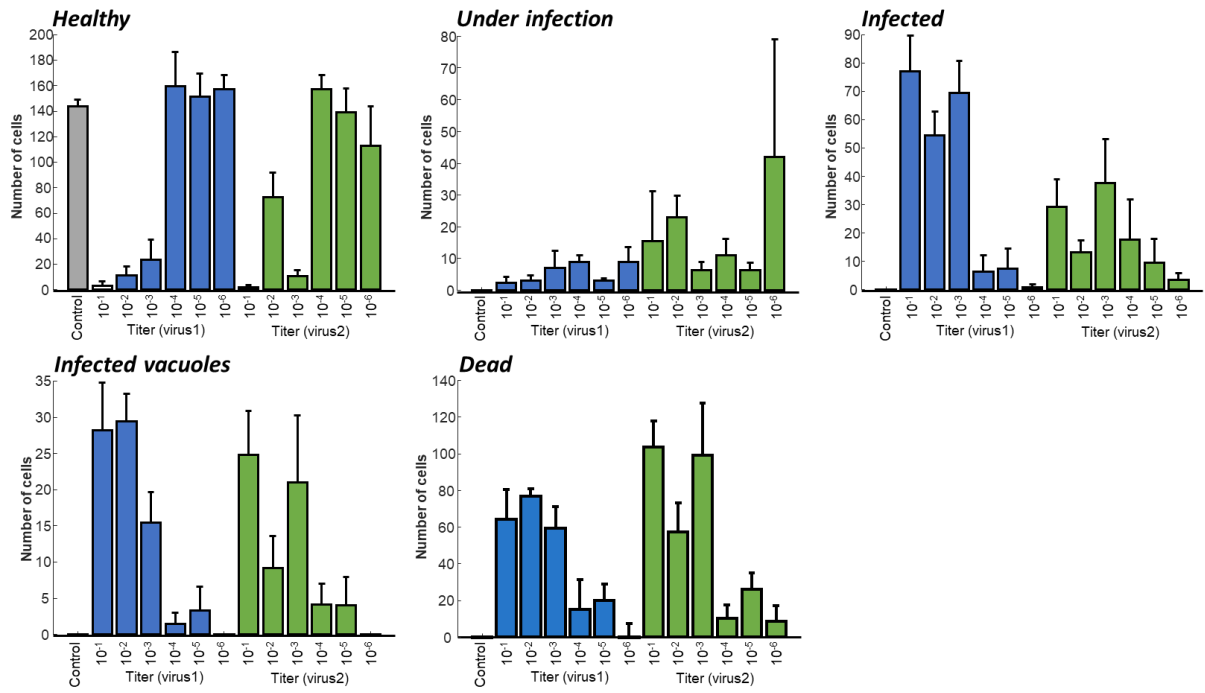

**Fig. S5. Distribution of cells in different infection state as the function of the virus titer.** All graphs show the average number of cells found in the different cell categories per image. If multiple images were taken with the same condition the data is averaged. Error bars show  $\pm$  S.E.M.



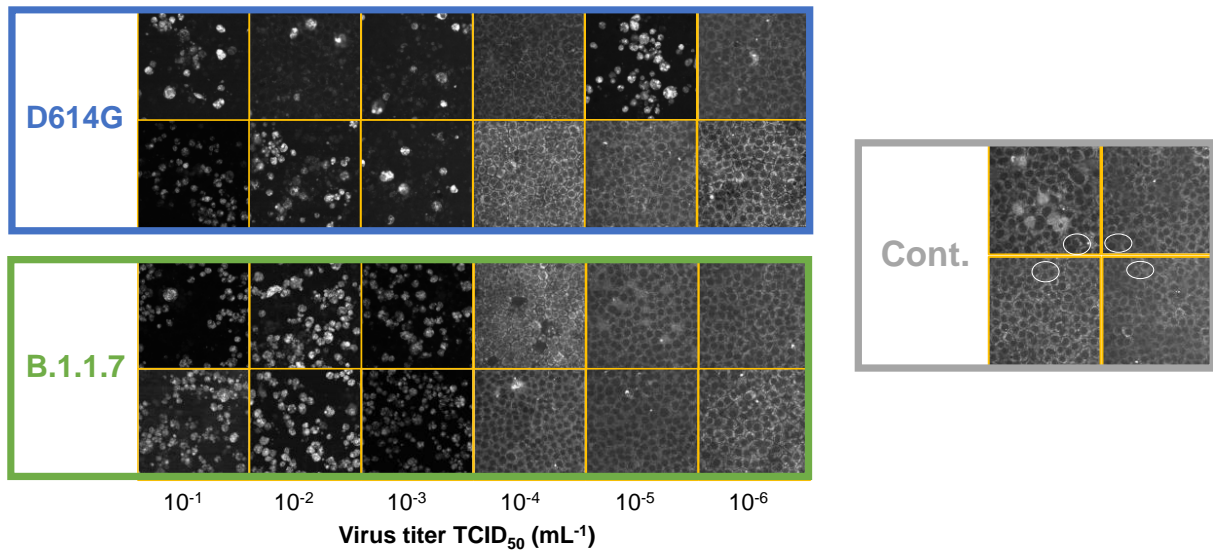

**Fig. S6. Exemplary images of the different levels of infection.** Representative images about how the applied virus titer influences the appearance of the labeled cell culture during two-photon imaging. Blue square shows the samples labeled with the D614G variant, green square for the B.1.1.7 variant. Gray (Cont.) panel square shows the Control images. Healthy cell membranes are exemplified with a white circle in Cont. panel.

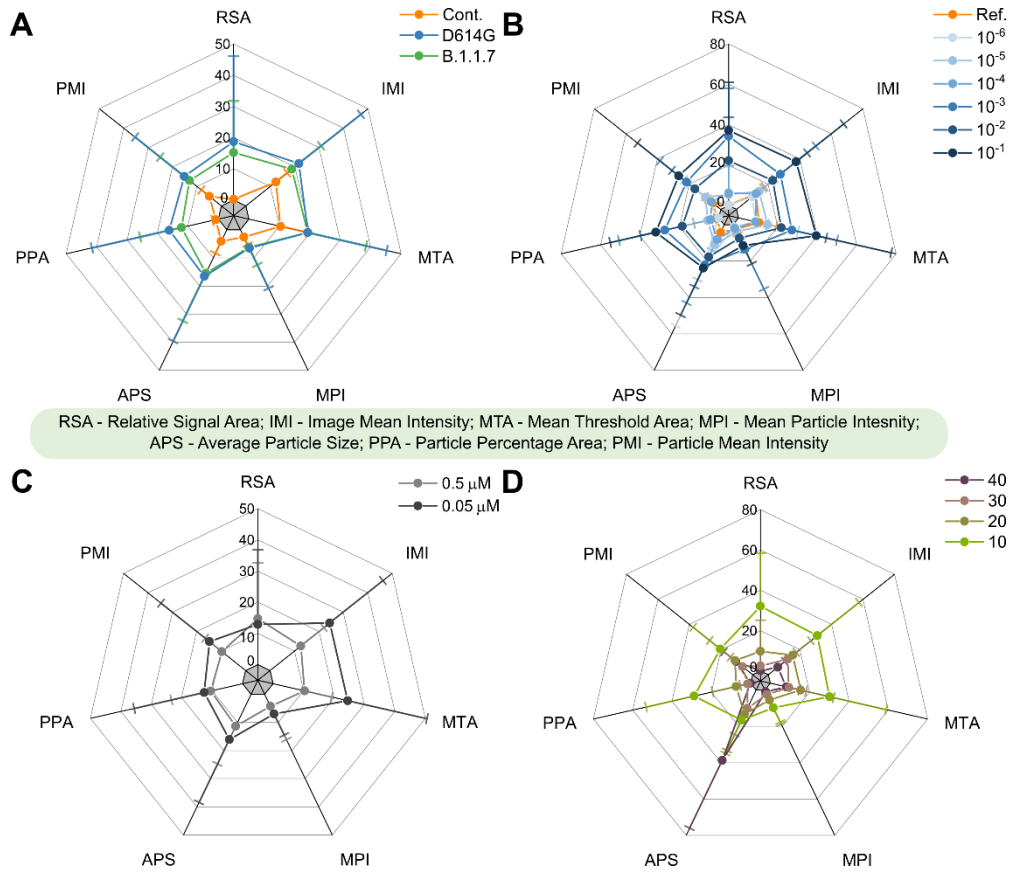

**Fig. S7.** Spider charts showing the effects of (A) variant, (B) virus titer, (C) dye concentration, and (D) photomultiplier tube (PMT) relative voltage on the range-normalized values of 7 different image parameters obtained from 2P microscopy images. This figure shows the same data as Fig. 2(B,C,E,F) but with error bars included.

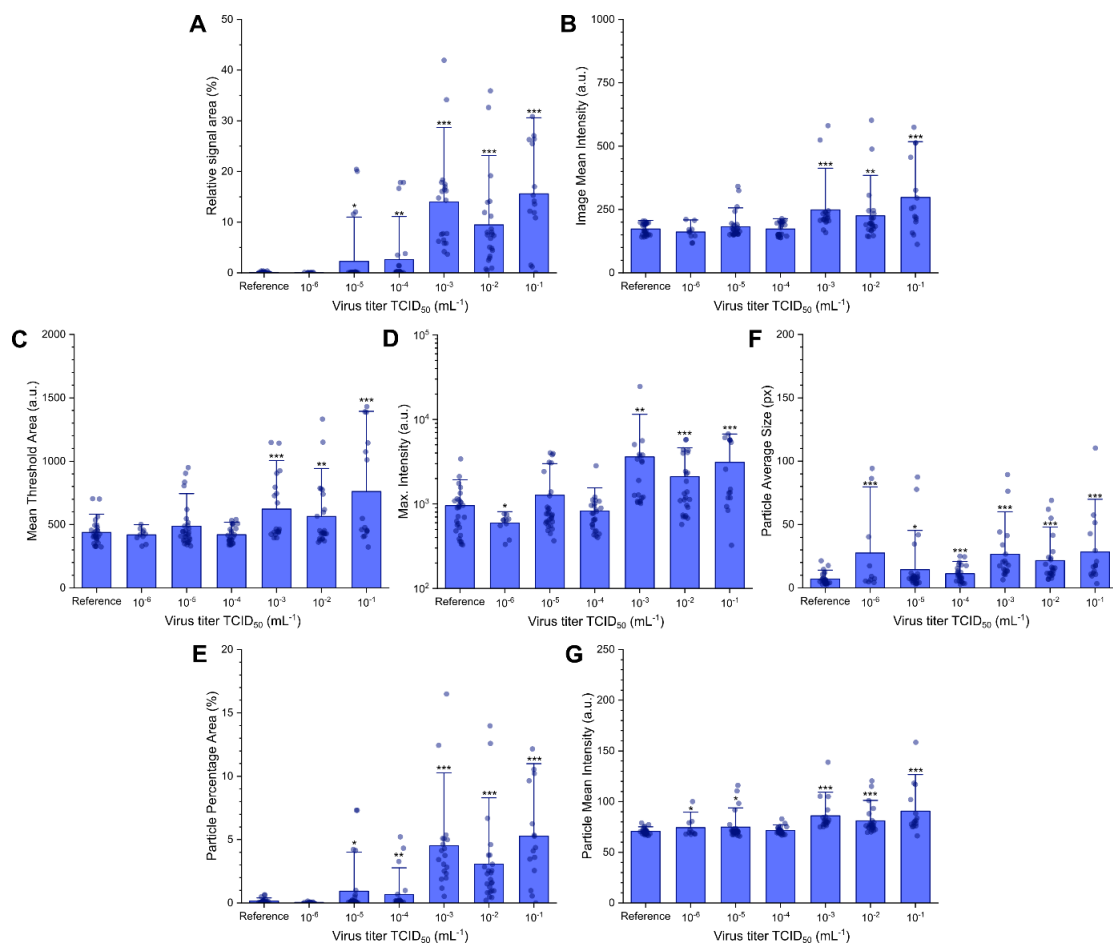

**Fig. S8. Image parameters from the automatic image analysis plotted against virus titer (TCID<sub>50</sub>).** The automatic analysis determined seven different parameters for each image. Dots represent the measurements from the individual images, while blue bars show the averages for the given measurement conditions. (Error bars show standard deviation; significance levels as: \* =  $p \leq 0.1$ ; \*\* =  $p \leq 0.05$ ; \*\*\* =  $p \leq 0.01$ ).

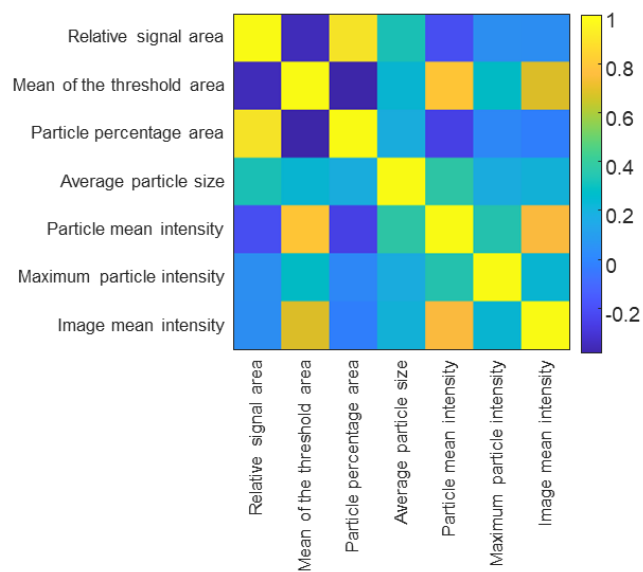

**Fig. S9. Cross-correlation between the parameters.** Cross-correlation between all the seven parameters. None of the correlation coefficient besides the center axes was higher than 0.8, therefore all parameters could be used during the cluster analysis.

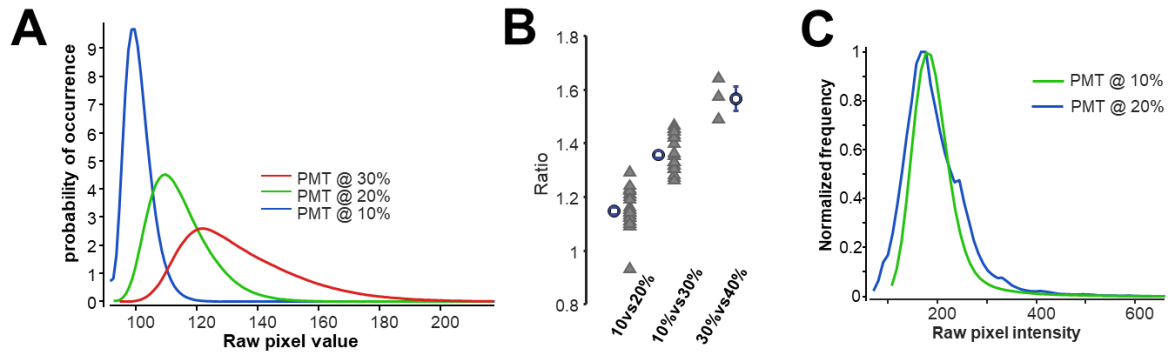

**Fig. S10. Normalization for different PMT voltages.** (A) Exemplified pixel intensity histograms for an imaging region that has been measured with three different PMT voltage. For comparison between images measured at different PMT voltage, images at 20% and 30% are normalized to the level of the images which were measured. For this normalization an offset and a division have been used. The offset and division coefficients were determined so that the curves have similar mean and deviation. Coefficient from multiple image duplets and triplets were averaged. This average was used for all the images. (B) Division ratios for the different PMT voltage differences. Triangles show the individual calculations while circles show the averages. Error bars represented as S.E.M. (C) Show of an example of the normalized histogram. Curves were drawn from the images acquired with virus titer of  $10^{-2}$  mL<sup>-1</sup> TCID<sub>50</sub> for the B.1.1.7 variant. For 10% PMT case data is pulled from the original figure while the image acquires at 20% PMT was normalized as above before the histogram is calculated.

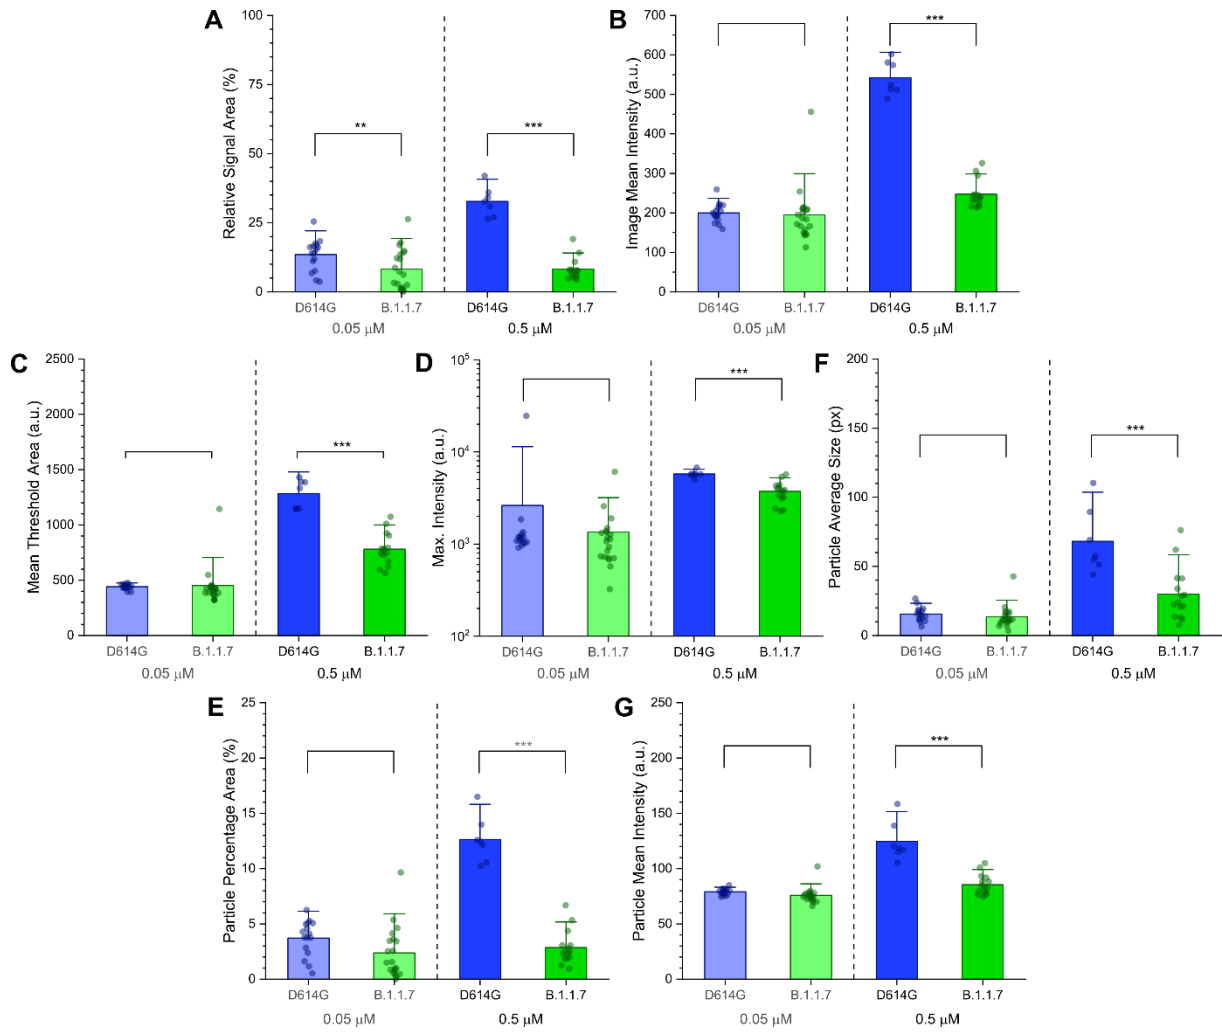

**Fig. S11. Image parameters from the automatic image analysis plotted against the virus variant at different dye concentrations (i.e. 0.5  $\mu\text{M}$  and 0.05  $\mu\text{M}$ ).** Only data points corresponding to virus titer of  $10^{-3} \text{ mL}^{-1} \text{ TCID}_{50}$  and higher were considered. Dots represent the measurements from the individual images, while bars show the averages for the given measurement conditions. (Error bars show standard deviation; significance levels as: \* =  $p \leq 0.1$ ; \*\* =  $p \leq 0.05$ ; \*\*\* =  $p \leq 0.01$ ).



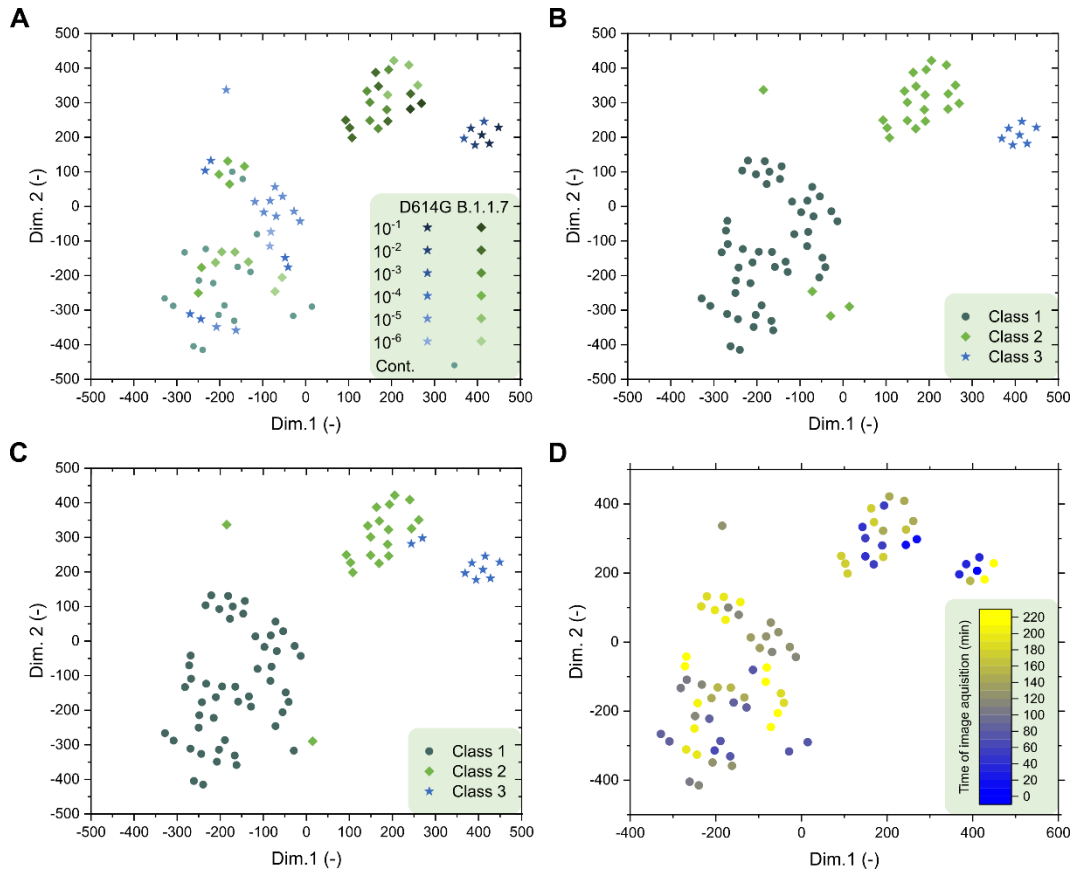

**Fig. S12. T-distributed stochastic neighbor embedding (t-SNE) 2D plots** obtained from all the seven image parameters recorded at  $0.5 \mu M$  dye concentration. (A) t-SNE plot with virus titer  $TCID_{50}$  ( $ml^{-1}$ ) values and virus variant for each point. (B) t-SNE plot showing the three classes established by seven-dimensional gaussian mixture model clustering. (C) t-SNE plot showing the three classes established by seven-dimensional k-means clustering. For both clustering methods, the number of clusters was set to three. (D) The same t-SNE plot showing the temporal order of image acquisition. There is no apparent correlation between the time of acquisition and the classification of the images.

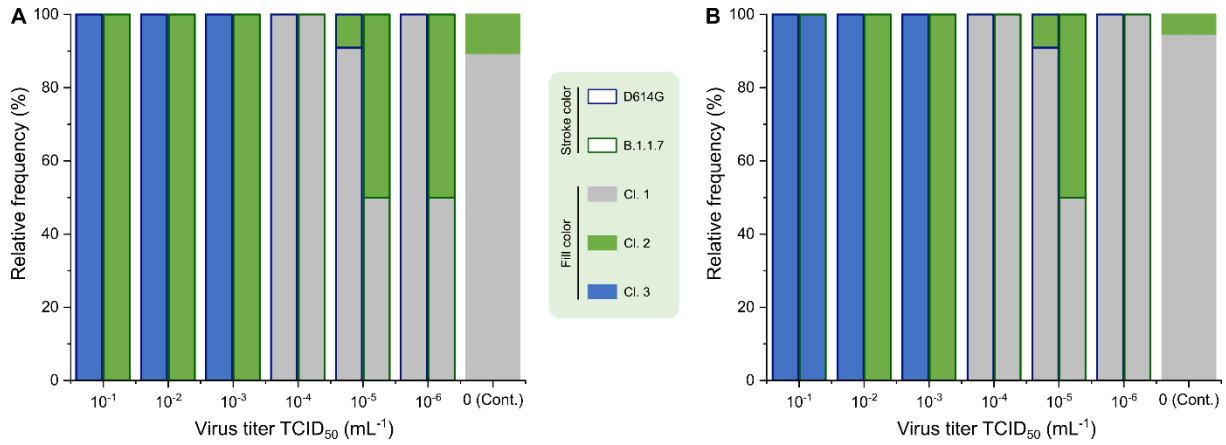

**Fig. S13. Classification of the images corresponding to different variants at various virus titer in three clusters by seven-dimensional clustering.** (A) Gaussian mixture model clustering. (B) K-means clustering. The virus variant and the designated cluster are indicated by the stroke color and the fill color, respectively. Both clustering analysis methods gave similar results. In detail, the three clusters in both cases match very well the following categories with a few outlier datapoints: i) no infection or low-level infection, ii) high level of D614G infection, iii) high level of B.1.1.7 infection.

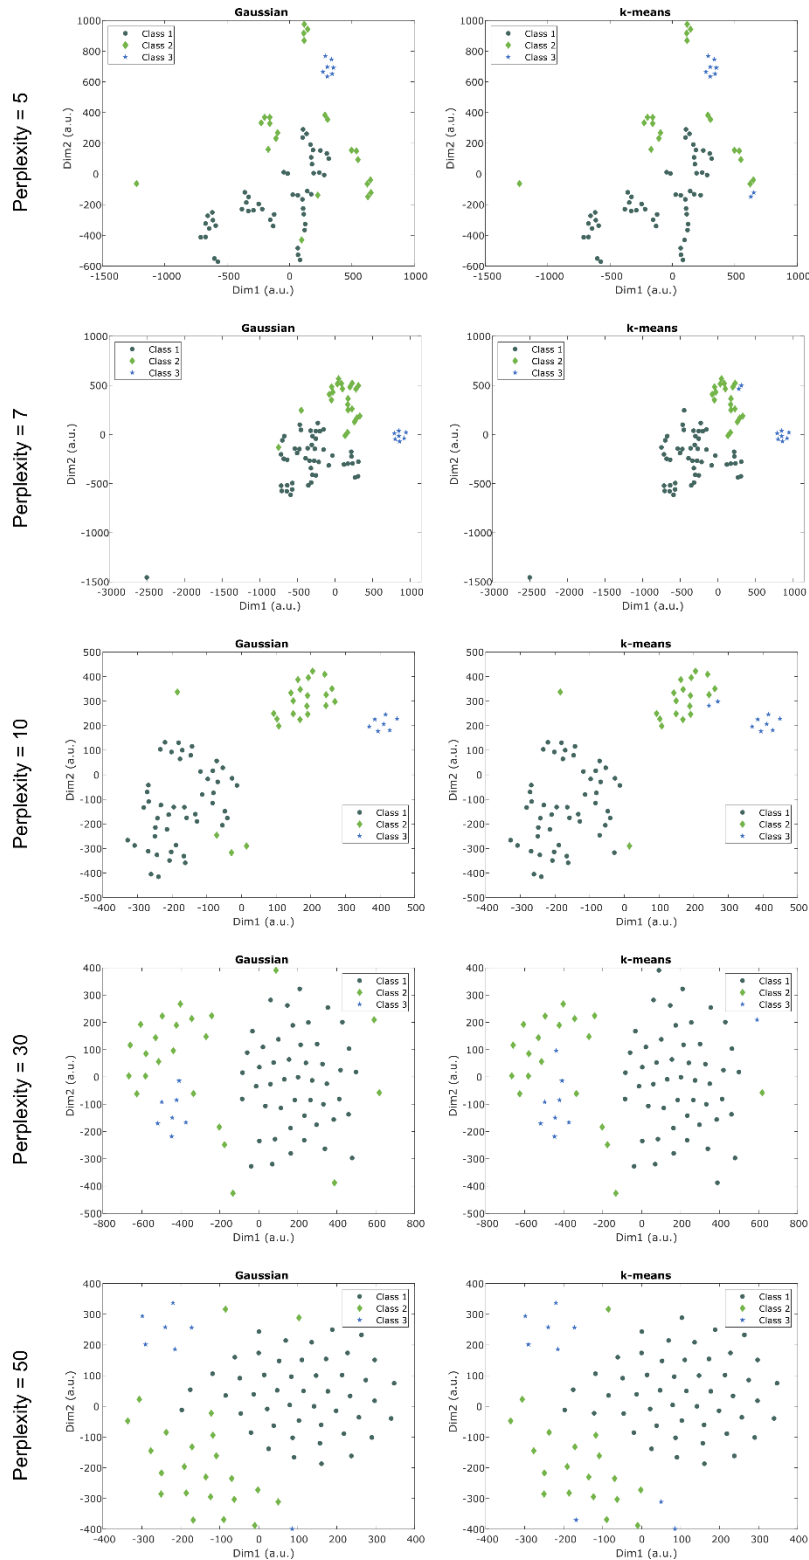

**Fig. S14. Effect of the selected perplexity value on the t-SNE plot.** The perplexity is an arbitrarily selected parameter used by the t-SNE algorithm that reflects the effective number of local neighbors of each point. Typical values are between 5 and 50, and usually larger datasets give better results with higher perplexity value. In this case, many small clusters form with the perplexity set to 5. With a value of 7, three clusters start to appear with an extreme outlier datapoint. The three clusters are the best defined and best separated at a perplexity value of 10. At higher perplexity selections of 30 and 50, the separation of clusters becomes smaller and the distances between neighboring become more uniform.

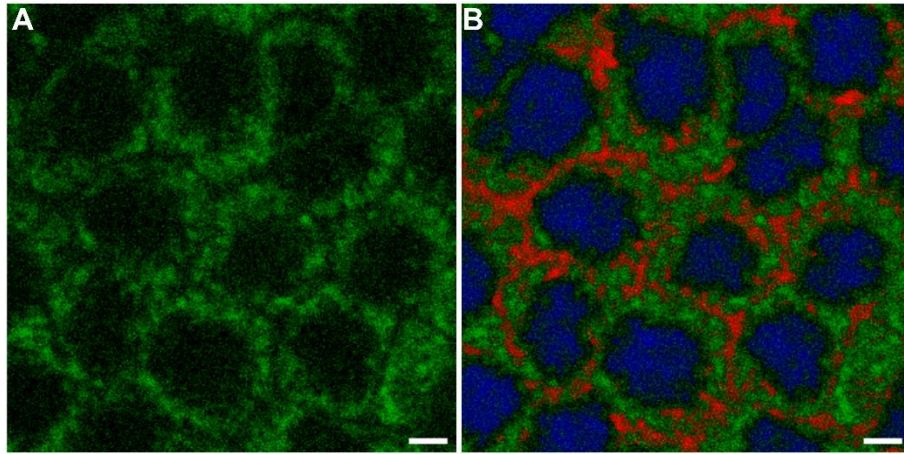

**Fig. S15.** The cytosolic localization of BEEF-CP visualizes the cell bodies. (A) Control Vero e6 cell culture stained with BEEF-CP yields 2P micrographs in which the individual cells are clearly distinguishable. (B) Artificial coloring used to highlight the nucleus (blue) and cell membranes (red) that are visible as regions of low fluorescence intensity in panel A. Scale bar: 10  $\mu$ m.

**Table S1. Image parameter values from the manual cell counting analysis.** Each row represents a different image. Raw images can be found in Dataset S1.<sup>1</sup>

| Image ID | Titer<br>TCID <sub>50</sub><br>(mL <sup>-1</sup> ) | Variant | Dye<br>conc.<br>( $\mu$ M) | Health | Initial<br>infection | Infected | Infected<br>vacuoles | Sum | Dead |
|----------|----------------------------------------------------|---------|----------------------------|--------|----------------------|----------|----------------------|-----|------|
| 001      | 10 <sup>-1</sup>                                   | D614G   | 0.5                        | 0      | 0                    | 73       | 20                   | 93  | 73   |
| 003      | 10 <sup>-1</sup>                                   | D614G   | 0.5                        | 0      | 0                    | 83       | 15                   | 98  | 68   |
| 004      | 10 <sup>-1</sup>                                   | D614G   | 0.05                       | 0      | 0                    | 51       | 15                   | 66  | 100  |
| 005      | 10 <sup>-1</sup>                                   | D614G   | 0.05                       | 0      | 0                    | 65       | 35                   | 100 | 66   |
| 006      | 10 <sup>-1</sup>                                   | D614G   | 0.05                       | 1      | 16                   | 48       | 32                   | 97  | 69   |
| 007      | 10 <sup>-1</sup>                                   | B.1.1.7 | 0.5                        | 0      | 0                    | 68       | 20                   | 88  | 78   |
| 008      | 10 <sup>-1</sup>                                   | B.1.1.7 | 0.5                        | 0      | 0                    | 25       | 22                   | 47  | 119  |
| 009      | 10 <sup>-1</sup>                                   | B.1.1.7 | 0.5                        | 0      | 0                    | 19       | 30                   | 49  | 117  |
| 010      | 10 <sup>-1</sup>                                   | B.1.1.7 | 0.05                       | 21     | 34                   | 8        | 1                    | 64  | 102  |
| 014      | 10 <sup>-1</sup>                                   | B.1.1.7 | 0.05                       | 3      | 0                    | 46       | 46                   | 95  | 71   |
| 013      | 10 <sup>-1</sup>                                   | B.1.1.7 | 0.05                       | 20     | 0                    | 10       | 30                   | 60  | 106  |
| 016      | 10 <sup>-2</sup>                                   | D614G   | 0.5                        | 0      | 0                    | 45       | 40                   | 85  | 81   |
| 017      | 10 <sup>-2</sup>                                   | D614G   | 0.5                        | 0      | 0                    | 77       | 21                   | 98  | 68   |
| 019      | 10 <sup>-2</sup>                                   | D614G   | 0.05                       | 3      | 1                    | 51       | 32                   | 87  | 79   |
| 021      | 10 <sup>-2</sup>                                   | D614G   | 0.05                       | 4      | 7                    | 31       | 34                   | 76  | 90   |
| 023      | 10 <sup>-2</sup>                                   | D614G   | 0.05                       | 6      | 7                    | 69       | 20                   | 102 | 64   |
| 024      | 10 <sup>-2</sup>                                   | B.1.1.7 | 0.5                        | 0      | 5                    | 31       | 26                   | 62  | 104  |
| 027      | 10 <sup>-2</sup>                                   | B.1.1.7 | 0.5                        | 0      | 13                   | 3        | 0                    | 16  | 150  |
| 030      | 10 <sup>-2</sup>                                   | B.1.1.7 | 0.5                        | 0      | 8                    | 16       | 15                   | 39  | 127  |
| 033      | 10 <sup>-2</sup>                                   | B.1.1.7 | 0.05                       | 11     | 44                   | 5        | 5                    | 65  | 101  |
| 036      | 10 <sup>-2</sup>                                   | B.1.1.7 | 0.05                       | 20     | 39                   | 11       | 0                    | 70  | 96   |
| 039      | 10 <sup>-2</sup>                                   | B.1.1.7 | 0.05                       | 23     | 29                   | 14       | 14                   | 80  | 86   |
| 040      | 10 <sup>-3</sup>                                   | D614G   | 0.5                        | 0      | 0                    | 64       | 5                    | 69  | 97   |
| 041      | 10 <sup>-3</sup>                                   | D614G   | 0.5                        | 0      | 0                    | 85       | 29                   | 114 | 52   |
| 042      | 10 <sup>-3</sup>                                   | D614G   | 10                         | 1      | 0.                   | 97       | 15                   | 113 | 53   |
| 043      | 10 <sup>-3</sup>                                   | D614G   | 0.05                       | 0      | 0                    | 82       | 24                   | 106 | 60   |
| 045      | 10 <sup>-3</sup>                                   | D614G   | 0.05                       | 21     | 33                   | 18       | 3                    | 75  | 91   |
| 048      | 10 <sup>-3</sup>                                   | D614G   | 0.05                       | 21     | 9                    | 70       | 17                   | 117 | 49   |
| 050      | 10 <sup>-3</sup>                                   | B.1.1.7 | 0.5                        | 0      | 7                    | 9        | 10                   | 26  | 140  |
| 052      | 10 <sup>-3</sup>                                   | B.1.1.7 | 0.5                        | 18     | 0                    | 11       | 11                   | 40  | 126  |
| 054      | 10 <sup>-3</sup>                                   | B.1.1.7 | 0.5                        | 0      | 1                    | 22       | 1                    | 24  | 142  |
| 056      | 10 <sup>-3</sup>                                   | B.1.1.7 | 0.05                       | 21     | 14                   | 60       | 53                   | 148 | 18   |
| 058      | 10 <sup>-3</sup>                                   | B.1.1.7 | 0.05                       | 15     | 10                   | 87       | 30                   | 142 | 24   |
| 060      | 10 <sup>-4</sup>                                   | D614G   | 0.5                        | 181    | 9                    | 0        | 0                    | 190 | 0    |
| 062      | 10 <sup>-4</sup>                                   | D614G   | 0.5                        | 177    | 16                   | 0        | 0                    | 193 | 0    |
| 064      | 10 <sup>-4</sup>                                   | D614G   | 0.5                        | 184    | 4                    | 1        | 0                    | 189 | 0    |
| 065      | 10 <sup>-4</sup>                                   | D614G   | 0.05                       | 139    | 5                    | 1        | 0                    | 145 | 21   |
| 068      | 10 <sup>-4</sup>                                   | D614G   | 0.05                       | 139    | 5                    | 1        | 0                    | 115 | 21   |
| 070      | 10 <sup>-4</sup>                                   | D614G   | 0.05                       | 120    | 6                    | 0        | 0                    | 190 | 40   |
| 072      | 10 <sup>-4</sup>                                   | B.1.1.7 | 0.5                        | 175    | 8                    | 0        | 0                    | 183 | 0    |
| 074      | 10 <sup>-4</sup>                                   | B.1.1.7 | 0.5                        | 170    | 0                    | 0        | 0                    | 170 | 0    |
| 076      | 10 <sup>-4</sup>                                   | B.1.1.7 | 0.5                        | 176    | 4                    | 0        | 0                    | 180 | 0    |
| 078      | 10 <sup>-4</sup>                                   | B.1.1.7 | 0.05                       | 164    | 28                   | 1        | 1                    | 194 | 0    |

**Table S1.** continued

| <b>Image ID</b> | <b>Titer<br/>TCID<sub>50</sub><br/>(mL<sup>-1</sup>)</b> | <b>Variant</b> | <b>Dye<br/>conc.<br/>(<math>\mu</math>M)</b> | <b>Health</b> | <b>Initial<br/>infection</b> | <b>Infected</b> | <b>Infected<br/>vacuoles</b> | <b>Sum</b> | <b>Dead</b> |
|-----------------|----------------------------------------------------------|----------------|----------------------------------------------|---------------|------------------------------|-----------------|------------------------------|------------|-------------|
| 080             | 10 <sup>-4</sup>                                         | B.1.1.7        | 0.05                                         | 138           | 26                           | 20              | 7                            | 191        | 0           |
| 083             | 10 <sup>-4</sup>                                         | B.1.1.7        | 0.05                                         | 10            | 14                           | 86              | 17                           | 103        | 39          |
| 088             | 10 <sup>-5</sup>                                         | D614G          | 0.5                                          | 180           | 2                            | 0               | 0                            | 182        | 0           |
| 090             | 10 <sup>-5</sup>                                         | D614G          | 0.5                                          | 171           | 5                            | 0               | 0                            | 176        | 0           |
| 094             | 10 <sup>-5</sup>                                         | D614G          | 0.5                                          | 161           | 5                            | 1               | 0                            | 167        | 0           |
| 097             | 10 <sup>-5</sup>                                         | D614G          | 0.05                                         | 160           | 4                            | 0               | 0                            | 164        | 2           |
| 100             | 10 <sup>-5</sup>                                         | D614G          | 0.05                                         | 177           | 2                            | 1               | 0                            | 180        | 0           |
| 104             | 10 <sup>-5</sup>                                         | B.1.1.7        | 0.5                                          | 20            | 0                            | 43              | 20                           | 83         | 83          |
| 105             | 10 <sup>-5</sup>                                         | B.1.1.7        | 0.5                                          | 163           | 6                            | 0               | 0                            | 169        | 0           |
| 107             | 10 <sup>-5</sup>                                         | B.1.1.7        | 0.5                                          | 152           | 4                            | 5               | 0                            | 161        | 5           |
| 109             | 10 <sup>-5</sup>                                         | B.1.1.7        | 0.05                                         | 162           | 8                            | 0               | 0                            | 170        | 0           |
| 112             | 10 <sup>-5</sup>                                         | B.1.1.7        | 0.05                                         | 163           | 14                           | 0               | 0                            | 177        | 0           |
| 113             | 10 <sup>-6</sup>                                         | D614G          | 0.5                                          | 166           | 1                            | 0               | 0                            | 167        | 0           |
| 116             | 10 <sup>-6</sup>                                         | D614G          | 0.5                                          | 161           | 18                           | 1               | 0                            | 180        | 0           |
| 118             | 10 <sup>-6</sup>                                         | D614G          | 0.05                                         | 180           | 9                            | 2               | 0                            | 191        | 0           |
| 119             | 10 <sup>-6</sup>                                         | B.1.1.7        | 0.5                                          | 161           | 5                            | 1               | 0                            | 167        | 0           |
| 121             | 10 <sup>-6</sup>                                         | B.1.1.7        | 0.5                                          | 164           | 8                            | 1               | 0                            | 173        | 0           |
| 118             | 10 <sup>-6</sup>                                         | B.1.1.7        | 0.05                                         | 153           | 11                           | 1               | 0                            | 165        | 1           |
| 126             | 0                                                        | N/A            | 0.5                                          | 168           | 0                            | 0               | 0                            | 168        | 0           |
| 125             | 0                                                        | N/A            | 0.5                                          | 173           | 0                            | 0               | 0                            | 173        | 0           |
| 131             | 0                                                        | N/A            | 0.5                                          | 162           | 1                            | 0               | 0                            | 163        | 0           |
| 136             | 0                                                        | N/A            | 0.05                                         | 163           | 3                            | 0               | 0                            | 166        | 0           |
| 145             | 0                                                        | N/A            | 0.05                                         | 154           | 0                            | 0               | 0                            | 154        | 0           |
| 143             | 0                                                        | N/A            | 0.05                                         | 162           | 0                            | 0               | 0                            | 162        | 0           |



**Table S2. Summary of the manual cell counting analysis.**

| Titer<br>TCID <sub>50</sub><br>(mL <sup>-1</sup> ) | Variant | Dye<br>conc.<br>( $\mu$ M) | Mean value |                      |          |                       |       | Standard deviation |                      |                |                       |                |
|----------------------------------------------------|---------|----------------------------|------------|----------------------|----------|-----------------------|-------|--------------------|----------------------|----------------|-----------------------|----------------|
|                                                    |         |                            | Healthy    | Initial<br>infection | Infected | Infected<br>vacuoles. | Dead  | Healthy            | Initial<br>infection | Infected       | Infected<br>vacuoles. | Dead           |
| 10 <sup>-1</sup>                                   | D614G   | 0.5                        | 0.0        | 0.0                  | 69.0     | 16.7                  | 80.0  | 0.0                | 0.0                  | 16.4           | 2.9                   | 17.2           |
|                                                    |         | 0.05                       | 0.5        | 8.0                  | 56.5     | 33.5                  | 67.2  | 0.7                | 11.3                 | 12.0           | 2.1                   | 2.1            |
|                                                    | B.1.1.7 | 0.5                        | 0.0        | 0.0                  | 37.3     | 24.0                  | 104.3 | 0.0                | 0.0                  | 26.7           | 5.3                   | 23.1           |
|                                                    |         | 0.05                       | 14.7       | 11.3                 | 21.3     | 25.7                  | 92.7  | 10.1               | 19.6                 | 21.4           | 22.8                  | 19.2           |
| 10 <sup>-2</sup>                                   | D614G   | 0.5                        | 0.0        | 0.0                  | 61.0     | 30.5                  | 104.7 | 0.0                | 0.0                  | 22.6           | 13.4                  | 53.2           |
|                                                    |         | 0.05                       | 4.3        | 5.0                  | 50.3     | 28.7                  | 77.3  | 1.5                | 3.5                  | 19.0           | 7.6                   | 13.1           |
|                                                    | B.1.1.7 | 0.5                        | 0.0        | 8.7                  | 16.7     | 13.7                  | 126.7 | 0.0                | 4.0                  | 14.0           | 13.1                  | 23.0           |
|                                                    |         | 0.05                       | 18.0       | 37.3                 | 10.0     | 6.3                   | 94.0  | 6.2                | 7.6                  | 4.6            | 7.1                   | 7.6            |
| 10 <sup>-3</sup>                                   | D614G   | 0.5                        | 0.3        | 0.0                  | 82.0     | 16.3                  | 74.2  | 0.6                | 0.0                  | 16.7           | 12.1                  | 31.8           |
|                                                    |         | 0.05                       | 14.0       | 14.0                 | 56.7     | 14.7                  | 66.3  | 12.1               | 17.1                 | 34.0           | 10.7                  | 21.8           |
|                                                    | B.1.1.7 | 0.5                        | 6.0        | 2.7                  | 14.0     | 7.3                   | 135.7 | 10.4               | 3.8                  | 7.0            | 5.5                   | 8.7            |
|                                                    |         | 0.05                       | 18.0       | 12.0                 | 73.5     | 41.5                  | 20.7  | 4.2                | 2.8                  | 19.1           | 16.3                  | 4.2            |
| 10 <sup>-4</sup>                                   | D614G   | 0.5                        | 180.7      | 9.7                  | 0.3      | 0.0                   | 0.0   | 3.5                | 6.0                  | 0.6            | 0.0                   | 0.0            |
|                                                    |         | 0.05                       | 132.7      | 5.3                  | 0.7      | 0.0                   | 27.0  | 11.0               | 0.6                  | 0.6            | 0.0                   | 11.0           |
|                                                    | B.1.1.7 | 0.5                        | 173.7      | 4.0                  | 0.0      | 0.0                   | 0.0   | 3.2                | 4.0                  | 0.0            | 0.0                   | 0.0            |
|                                                    |         | 0.05                       | 104.0      | 22.7                 | 35.7     | 8.3                   | 0.0   | 82.4               | 7.6                  | 44.6           | 8.1                   | 0.0            |
| 10 <sup>-5</sup>                                   | D614G   | 0.5                        | 170.7      | 4.0                  | 0.3      | 0.0                   | 0.0   | 9.5                | 1.7                  | 0.6            | 0.0                   | 0.0            |
|                                                    |         | 0.05                       | 168.5      | 3.0                  | 0.5      | 0.0                   | 0.8   | 12.0               | 1.4                  | 0.7            | 0.0                   | 1.2            |
|                                                    | B.1.1.7 | 0.5                        | 111.7      | 3.3                  | 16.0     | 6.7                   | 29.1  | 79.6               | 3.1                  | 23.5           | 11.5                  | 46.4           |
|                                                    |         | 0.05                       | 162.5      | 11.0                 | 0.0      | 0.0                   | 0.0   | 0.7                | 4.2                  | 0.0            | 0.0                   | 0.0            |
| 10 <sup>-6</sup>                                   | D614G   | 0.5                        | 163.5      | 9.5                  | 0.5      | 0.0                   | 0.0   | 3.5                | 12.0                 | 0.7            | 0.0                   | 0.0            |
|                                                    |         | 0.05                       | 180.0      | 9.0                  | 2.0      | 0.0                   | 0.0   | - <sup>a</sup>     | - <sup>a</sup>       | - <sup>a</sup> | - <sup>a</sup>        | - <sup>a</sup> |
|                                                    | B.1.1.7 | 0.5                        | 162.5      | 6.5                  | 1.0      | 0.0                   | 0.0   | 2.1                | 2.1                  | 0.0            | 0.0                   | 0.0            |
|                                                    |         | 0.05                       | 153.0      | 11.0                 | 1.0      | 0.0                   | 0.7   | - <sup>a</sup>     | - <sup>a</sup>       | - <sup>a</sup> | - <sup>a</sup>        | - <sup>a</sup> |
| 0                                                  | N/A     | 0.5                        | 167.7      | 1.0                  | 0.0      | 0.0                   | 0.0   | 5.5                | 0.6                  | 0.0            | 0.0                   | 0.0            |
|                                                    |         | 0.05                       | 161.7      | 1.7                  | 0.0      | 0.0                   | 0.0   | 1.5                | 1.5                  | 0.0            | 0.0                   | 0.0            |

<sup>a</sup>Only one image was acquired with these parameters.

**Table S3. Image parameter values from the automatic image analysis.** Each row represents a different image. Raw images can be found in Dataset S1.<sup>1</sup>

| Image ID | Titer TCID <sub>50</sub> (mL <sup>-1</sup> ) | Variant | PMT relative voltage (%) | Dye dilution (μM) | Relative signal area (%) | Image mean intensity (a.u.) | Mean of the threshold area (a.u.) | Maximum particle intensity (a.u.) | Average particle size (px) | Particle percentage area (%) | Particle mean intensity (a.u.) |
|----------|----------------------------------------------|---------|--------------------------|-------------------|--------------------------|-----------------------------|-----------------------------------|-----------------------------------|----------------------------|------------------------------|--------------------------------|
| 001      | 10 <sup>-1</sup>                             | D614G   | 10                       | 0.5               | 27.076                   | 512                         | 1387                              | 5735                              | 51.5                       | 10.536                       | 116.9                          |
| 003      | 10 <sup>-1</sup>                             | D614G   | 10                       | 0.5               | 30.852                   | 574                         | 1390                              | 6737                              | 57.5                       | 12.159                       | 118.2                          |
| 008      | 10 <sup>-1</sup>                             | B.1.1.7 | 10                       | 0.5               | 14.156                   | 326                         | 1074                              | 5724                              | 29.4                       | 5.338                        | 88.3                           |
| 009      | 10 <sup>-1</sup>                             | B.1.1.7 | 10                       | 0.5               | 10.875                   | 295                         | 1010                              | 5365                              | 20.8                       | 4.371                        | 83.8                           |
| 002      | 10 <sup>-1</sup>                             | D614G   | 20                       | 0.5               | 26.412                   | 513                         | 1431                              | 5671                              | 110.3                      | 10.225                       | 158.4                          |
| 016      | 10 <sup>-2</sup>                             | D614G   | 10                       | 0.5               | 35.909                   | 602                         | 1333                              | 5735                              | 55.0                       | 13.974                       | 115.1                          |
| 017      | 10 <sup>-2</sup>                             | D614G   | 10                       | 0.5               | 32.637                   | 488                         | 1150                              | 5789                              | 69.1                       | 12.584                       | 120.4                          |
| 024      | 10 <sup>-2</sup>                             | B.1.1.7 | 10                       | 0.5               | 19.153                   | 306                         | 783                               | 4385                              | 24.1                       | 6.675                        | 88.0                           |
| 025      | 10 <sup>-2</sup>                             | B.1.1.7 | 10                       | 0.5               | 5.076                    | 213                         | 566                               | 2272                              | 7.7                        | 1.859                        | 74.6                           |
| 028      | 10 <sup>-2</sup>                             | B.1.1.7 | 10                       | 0.5               | 8.040                    | 234                         | 740                               | 4308                              | 13.6                       | 3.060                        | 79.6                           |
| 026      | 10 <sup>-2</sup>                             | B.1.1.7 | 20                       | 0.5               | 4.820                    | 217                         | 596                               | 2430                              | 22.3                       | 1.251                        | 76.6                           |
| 029      | 10 <sup>-2</sup>                             | B.1.1.7 | 20                       | 0.5               | 8.002                    | 246                         | 775                               | 4077                              | 41.5                       | 2.542                        | 93.3                           |
| 027      | 10 <sup>-2</sup>                             | B.1.1.7 | 30                       | 0.5               | 4.419                    | 217                         | 618                               | 2336                              | 28.7                       | 0.961                        | 76.4                           |
| 030      | 10 <sup>-2</sup>                             | B.1.1.7 | 30                       | 0.5               | 7.508                    | 245                         | 787                               | 3986                              | 62.1                       | 2.310                        | 101.1                          |
| 040      | 10 <sup>-3</sup>                             | D614G   | 10                       | 0.5               | 34.151                   | 524                         | 1148                              | 5049                              | 44.1                       | 12.434                       | 105.3                          |
| 041      | 10 <sup>-3</sup>                             | D614G   | 10                       | 0.5               | 41.923                   | 581                         | 1142                              | 5604                              | 89.4                       | 16.491                       | 138.8                          |
| 049      | 10 <sup>-3</sup>                             | B.1.1.7 | 10                       | 0.5               | 5.839                    | 220                         | 745                               | 3132                              | 13.2                       | 2.317                        | 79.3                           |
| 051      | 10 <sup>-3</sup>                             | B.1.1.7 | 10                       | 0.5               | 7.570                    | 238                         | 671                               | 3688                              | 11.8                       | 2.515                        | 77.5                           |
| 053      | 10 <sup>-3</sup>                             | B.1.1.7 | 10                       | 0.5               | 7.767                    | 240                         | 904                               | 3862                              | 21.3                       | 3.061                        | 82.2                           |
| 050      | 10 <sup>-3</sup>                             | B.1.1.7 | 20                       | 0.5               | 5.824                    | 231                         | 794                               | 3226                              | 41.3                       | 1.964                        | 91.9                           |
| 052      | 10 <sup>-3</sup>                             | B.1.1.7 | 20                       | 0.5               | 6.503                    | 233                         | 727                               | 3394                              | 34.0                       | 1.876                        | 84.4                           |
| 054      | 10 <sup>-3</sup>                             | B.1.1.7 | 20                       | 0.5               | 7.761                    | 245                         | 925                               | 3800                              | 76.3                       | 2.813                        | 105.0                          |
| 059      | 10 <sup>-4</sup>                             | D614G   | 20                       | 0.5               | 0.136                    | 200                         | 354                               | 480                               | 5.0                        | 0.116                        | 69.7                           |
| 061      | 10 <sup>-4</sup>                             | D614G   | 20                       | 0.5               | 0.068                    | 150                         | 394                               | 645                               | 10.3                       | 0.088                        | 72.3                           |
| 063      | 10 <sup>-4</sup>                             | D614G   | 20                       | 0.5               | 0.331                    | 179                         | 532                               | 1206                              | 9.3                        | 0.184                        | 71.3                           |
| 071      | 10 <sup>-4</sup>                             | B.1.1.7 | 20                       | 0.5               | 0.011                    | 198                         | 349                               | 470                               | 3.0                        | 0.057                        | 67.7                           |
| 073      | 10 <sup>-4</sup>                             | B.1.1.7 | 20                       | 0.5               | 0.022                    | 189                         | 346                               | 441                               | 3.5                        | 0.051                        | 67.4                           |
| 075      | 10 <sup>-4</sup>                             | B.1.1.7 | 20                       | 0.5               | 0.134                    | 196                         | 507                               | 962                               | 5.5                        | 0.155                        | 69.2                           |
| 060      | 10 <sup>-4</sup>                             | D614G   | 30                       | 0.5               | 0.105                    | 205                         | 341                               | 431                               | 5.4                        | 0.073                        | 68.8                           |
| 062      | 10 <sup>-4</sup>                             | D614G   | 30                       | 0.5               | 0.063                    | 150                         | 372                               | 571                               | 15.5                       | 0.049                        | 73.7                           |
| 064      | 10 <sup>-4</sup>                             | D614G   | 30                       | 0.5               | 0.325                    | 185                         | 508                               | 1102                              | 12.3                       | 0.161                        | 71.7                           |
| 072      | 10 <sup>-4</sup>                             | B.1.1.7 | 30                       | 0.5               | 0.008                    | 202                         | 338                               | 401                               | 3.8                        | 0.049                        | 67.5                           |
| 074      | 10 <sup>-4</sup>                             | B.1.1.7 | 30                       | 0.5               | 0.011                    | 191                         | 341                               | 417                               | 4.8                        | 0.037                        | 66.9                           |
| 076      | 10 <sup>-4</sup>                             | B.1.1.7 | 30                       | 0.5               | 0.131                    | 202                         | 462                               | 812                               | 8.2                        | 0.133                        | 69.1                           |
| 084      | 10 <sup>-5</sup>                             | D614G   | 10                       | 0.5               | 0.179                    | 171                         | 368                               | 726                               | 3.5                        | 0.992                        | 71.6                           |
| 085      | 10 <sup>-5</sup>                             | D614G   | 10                       | 0.5               | 0.090                    | 157                         | 358                               | 551                               | 2.7                        | 0.465                        | 70.2                           |
| 090      | 10 <sup>-5</sup>                             | D614G   | 10                       | 0.5               | 0.189                    | 161                         | 494                               | 1390                              | 3.6                        | 0.641                        | 71.3                           |
| 101      | 10 <sup>-5</sup>                             | B.1.1.7 | 10                       | 0.5               | 11.604                   | 243                         | 806                               | 3111                              | 34.6                       | 4.227                        | 91.7                           |
| 102      | 10 <sup>-5</sup>                             | B.1.1.7 | 10                       | 0.5               | 20.042                   | 325                         | 904                               | 3938                              | 41.9                       | 7.312                        | 98.2                           |
| 086      | 10 <sup>-5</sup>                             | D614G   | 20                       | 0.5               | 0.063                    | 172                         | 375                               | 612                               | 4.2                        | 0.194                        | 68.6                           |
| 087      | 10 <sup>-5</sup>                             | D614G   | 20                       | 0.5               | 0.117                    | 168                         | 340                               | 447                               | 3.9                        | 0.067                        | 67.7                           |
| 091      | 10 <sup>-5</sup>                             | D614G   | 20                       | 0.5               | 0.113                    | 159                         | 546                               | 1249                              | 6.6                        | 0.168                        | 69.4                           |

**Table S3** continued

| Image ID | Titer TCID <sub>50</sub> (mL <sup>-1</sup> ) | Variant | PMT relative voltage (%) | Dye dilution (μM) | Relative signal area (%) | Image mean intensity (a.u.) | Mean of the threshold area (a.u.) | Maximum particle intensity (a.u.) | Average particle size (px) | Particle percentage area (%) | Particle mean intensity (a.u.) |
|----------|----------------------------------------------|---------|--------------------------|-------------------|--------------------------|-----------------------------|-----------------------------------|-----------------------------------|----------------------------|------------------------------|--------------------------------|
| 093      | 10 <sup>-5</sup>                             | D614G   | 20                       | 0.5               | 0.075                    | 175                         | 374                               | 619                               | 5.7                        | 0.047                        | 67.4                           |
| 103      | 10 <sup>-5</sup>                             | B.1.1.7 | 20                       | 0.5               | 12.014                   | 261                         | 835                               | 3074                              | 77.8                       | 4.141                        | 110.6                          |
| 104      | 10 <sup>-5</sup>                             | B.1.1.7 | 20                       | 0.5               | 20.425                   | 341                         | 949                               | 3823                              | 87.5                       | 7.308                        | 116.0                          |
| 105      | 10 <sup>-5</sup>                             | B.1.1.7 | 20                       | 0.5               | 0.102                    | 190                         | 435                               | 761                               | 8.2                        | 0.110                        | 69.9                           |
| 107      | 10 <sup>-5</sup>                             | B.1.1.7 | 20                       | 0.5               | 0.044                    | 186                         | 402                               | 886                               | 7.2                        | 0.066                        | 71.0                           |
| 088      | 10 <sup>-5</sup>                             | D614G   | 30                       | 0.5               | 0.048                    | 170                         | 348                               | 485                               | 5.8                        | 0.222                        | 67.5                           |
| 089      | 10 <sup>-5</sup>                             | D614G   | 30                       | 0.5               | 0.019                    | 164                         | 330                               | 366                               | 4.1                        | 0.016                        | 66.0                           |
| 092      | 10 <sup>-5</sup>                             | D614G   | 30                       | 0.5               | 0.171                    | 160                         | 619                               | 4018                              | 7.5                        | 0.151                        | 73.4                           |
| 094      | 10 <sup>-5</sup>                             | D614G   | 30                       | 0.5               | 0.098                    | 178                         | 359                               | 505                               | 8.0                        | 0.029                        | 66.5                           |
| 106      | 10 <sup>-5</sup>                             | B.1.1.7 | 30                       | 0.5               | 0.087                    | 194                         | 398                               | 594                               | 11.6                       | 0.080                        | 71.6                           |
| 108      | 10 <sup>-5</sup>                             | B.1.1.7 | 30                       | 0.5               | 0.026                    | 191                         | 383                               | 672                               | 8.0                        | 0.033                        | 70.6                           |
| 113      | 10 <sup>-6</sup>                             | D614G   | 20                       | 0.5               | 0.106                    | 207                         | 425                               | 662                               | 4.3                        | 0.073                        | 68.4                           |
| 115      | 10 <sup>-6</sup>                             | D614G   | 20                       | 0.5               | 0.060                    | 171                         | 419                               | 645                               | 4.7                        | 0.142                        | 69.4                           |
| 114      | 10 <sup>-6</sup>                             | D614G   | 30                       | 0.5               | 0.092                    | 211                         | 398                               | 554                               | 5.4                        | 0.040                        | 67.9                           |
| 116      | 10 <sup>-6</sup>                             | D614G   | 30                       | 0.5               | 0.058                    | 171                         | 406                               | 584                               | 9.0                        | 0.067                        | 69.9                           |
| 119      | 10 <sup>-6</sup>                             | B.1.1.7 | 30                       | 0.5               | 0.054                    | 161                         | 455                               | 764                               | 17.4                       | 0.032                        | 72.0                           |
| 120      | 10 <sup>-6</sup>                             | B.1.1.7 | 40                       | 0.5               | 0.037                    | 161                         | 442                               | 645                               | 40.3                       | 0.024                        | 79.1                           |
| 123      | Reference                                    | N/A     | 10                       | 0.5               | 0.133                    | 165                         | 496                               | 1063                              | 3.2                        | 0.646                        | 71.5                           |
| 124      | Reference                                    | N/A     | 10                       | 0.5               | 0.190                    | 155                         | 453                               | 3415                              | 3.4                        | 0.630                        | 71.6                           |
| 129      | Reference                                    | N/A     | 10                       | 0.5               | 0.359                    | 187                         | 435                               | 1150                              | 3.1                        | 0.491                        | 71.1                           |
| 125      | Reference                                    | N/A     | 20                       | 0.5               | 0.093                    | 168                         | 536                               | 906                               | 5.5                        | 0.167                        | 69.6                           |
| 126      | Reference                                    | N/A     | 20                       | 0.5               | 0.124                    | 163                         | 411                               | 962                               | 5.9                        | 0.157                        | 69.4                           |
| 130      | Reference                                    | N/A     | 20                       | 0.5               | 0.375                    | 189                         | 444                               | 1117                              | 11.2                       | 0.160                        | 75.5                           |
| 131      | Reference                                    | N/A     | 20                       | 0.5               | 0.051                    | 193                         | 408                               | 563                               | 10.6                       | 0.060                        | 72.4                           |
| 144      | Reference                                    | N/A     | 20                       | 0.5               | 0.047                    | 200                         | 404                               | 1044                              | 3.6                        | 0.121                        | 68.2                           |
| 146      | Reference                                    | N/A     | 20                       | 0.5               | 0.062                    | 189                         | 702                               | 1747                              | 4.4                        | 0.081                        | 69.7                           |
| 147      | Reference                                    | N/A     | 20                       | 0.5               | 0.016                    | 192                         | 330                               | 361                               | 3.2                        | 0.093                        | 68.0                           |
| 150      | Reference                                    | N/A     | 20                       | 0.5               | 0.060                    | 199                         | 457                               | 1084                              | 5.1                        | 0.048                        | 70.3                           |
| 127      | Reference                                    | N/A     | 30                       | 0.5               | 0.075                    | 165                         | 494                               | 708                               | 7.9                        | 0.124                        | 68.4                           |
| 128      | Reference                                    | N/A     | 30                       | 0.5               | 0.094                    | 162                         | 425                               | 2112                              | 7.0                        | 0.093                        | 72.1                           |
| 132      | Reference                                    | N/A     | 30                       | 0.5               | 0.381                    | 198                         | 426                               | 962                               | 17.6                       | 0.101                        | 77.2                           |
| 133      | Reference                                    | N/A     | 30                       | 0.5               | 0.043                    | 198                         | 392                               | 526                               | 12.4                       | 0.037                        | 70.4                           |
| 145      | Reference                                    | N/A     | 30                       | 0.5               | 0.051                    | 204                         | 393                               | 934                               | 5.0                        | 0.077                        | 68.2                           |
| 148      | Reference                                    | N/A     | 30                       | 0.5               | 0.051                    | 193                         | 704                               | 1566                              | 5.4                        | 0.057                        | 68.7                           |
| 149      | Reference                                    | N/A     | 30                       | 0.5               | 0.006                    | 196                         | 324                               | 335                               | 3.7                        | 0.034                        | 66.9                           |
| 151      | Reference                                    | N/A     | 30                       | 0.5               | 0.079                    | 204                         | 401                               | 901                               | 7.4                        | 0.030                        | 70.5                           |
| 004      | 10 <sup>-1</sup>                             | D614G   | 10                       | 0.05              | 15.320                   | 223                         | 476                               | 1346                              | 13.2                       | 4.112                        | 80.3                           |
| 005      | 10 <sup>-1</sup>                             | D614G   | 10                       | 0.05              | 17.002                   | 219                         | 459                               | 1183                              | 17.7                       | 5.264                        | 81.5                           |
| 006      | 10 <sup>-1</sup>                             | D614G   | 10                       | 0.05              | 25.483                   | 259                         | 443                               | 1183                              | 11.7                       | 6.250                        | 79.3                           |
| 007      | 10 <sup>-1</sup>                             | B.1.1.7 | 10                       | 0.05              | 26.296                   | 456                         | 1144                              | 6094                              | 42.7                       | 9.644                        | 101.9                          |
| 010      | 10 <sup>-1</sup>                             | B.1.1.7 | 10                       | 0.05              | 1.542                    | 158                         | 405                               | 933                               | 9.4                        | 0.974                        | 75.2                           |
| 011      | 10 <sup>-1</sup>                             | B.1.1.7 | 10                       | 0.05              | 12.181                   | 254                         | 548                               | 2577                              | 10.9                       | 3.461                        | 77.7                           |
| 014      | 10 <sup>-1</sup>                             | B.1.1.7 | 10                       | 0.05              | 13.541                   | 211                         | 450                               | 1488                              | 10.8                       | 3.594                        | 78.5                           |
| 012      | 10 <sup>-1</sup>                             | B.1.1.7 | 20                       | 0.05              | 1.189                    | 150                         | 409                               | 843                               | 16.8                       | 0.551                        | 75.5                           |

**Table S3** continued

| Image ID | Titer TCID <sub>50</sub> (mL <sup>-1</sup> ) | Variant | PMT relative voltage (%) | Dye dilution (μM) | Relative signal area (%) | Image mean intensity (a.u.) | Mean of the threshold area (a.u.) | Maximum particle intensity (a.u.) | Average particle size (px) | Particle percentage area (%) | Particle mean intensity (a.u.) |
|----------|----------------------------------------------|---------|--------------------------|-------------------|--------------------------|-----------------------------|-----------------------------------|-----------------------------------|----------------------------|------------------------------|--------------------------------|
| 013      | 10 <sup>-1</sup>                             | B.1.1.7 | 20                       | 0.05              | 0.000                    | 113                         | 323                               | 325                               | 3.4                        | 0.004                        | 66.1                           |
| 015      | 10 <sup>-1</sup>                             | B.1.1.7 | 20                       | 0.05              | 11.896                   | 202                         | 455                               | 1361                              | 17.4                       | 2.559                        | 75.9                           |
| 018      | 10 <sup>-2</sup>                             | D614G   | 10                       | 0.05              | 11.899                   | 194                         | 431                               | 1118                              | 11.7                       | 3.766                        | 78.1                           |
| 020      | 10 <sup>-2</sup>                             | D614G   | 10                       | 0.05              | 7.604                    | 182                         | 427                               | 965                               | 10.0                       | 2.381                        | 77.4                           |
| 022      | 10 <sup>-2</sup>                             | D614G   | 10                       | 0.05              | 14.106                   | 194                         | 453                               | 1858                              | 16.3                       | 4.603                        | 81.4                           |
| 031      | 10 <sup>-2</sup>                             | B.1.1.7 | 10                       | 0.05              | 0.945                    | 143                         | 375                               | 704                               | 6.9                        | 0.811                        | 74.0                           |
| 034      | 10 <sup>-2</sup>                             | B.1.1.7 | 10                       | 0.05              | 3.280                    | 171                         | 387                               | 737                               | 6.9                        | 1.502                        | 74.4                           |
| 037      | 10 <sup>-2</sup>                             | B.1.1.7 | 10                       | 0.05              | 8.701                    | 195                         | 428                               | 1325                              | 9.0                        | 2.531                        | 76.6                           |
| 019      | 10 <sup>-2</sup>                             | D614G   | 20                       | 0.05              | 11.167                   | 190                         | 435                               | 1094                              | 18.7                       | 2.838                        | 76.2                           |
| 021      | 10 <sup>-2</sup>                             | D614G   | 20                       | 0.05              | 6.804                    | 174                         | 428                               | 909                               | 15.7                       | 1.612                        | 74.5                           |
| 023      | 10 <sup>-2</sup>                             | D614G   | 20                       | 0.05              | 13.932                   | 194                         | 452                               | 1193                              | 23.6                       | 3.776                        | 78.0                           |
| 032      | 10 <sup>-2</sup>                             | B.1.1.7 | 20                       | 0.05              | 0.770                    | 147                         | 371                               | 678                               | 10.9                       | 0.434                        | 71.2                           |
| 035      | 10 <sup>-2</sup>                             | B.1.1.7 | 20                       | 0.05              | 2.889                    | 167                         | 389                               | 724                               | 11.4                       | 0.858                        | 72.3                           |
| 038      | 10 <sup>-2</sup>                             | B.1.1.7 | 20                       | 0.05              | 7.344                    | 187                         | 436                               | 1391                              | 14.4                       | 1.563                        | 74.2                           |
| 033      | 10 <sup>-2</sup>                             | B.1.1.7 | 30                       | 0.05              | 0.503                    | 145                         | 361                               | 571                               | 11.5                       | 0.204                        | 69.7                           |
| 036      | 10 <sup>-2</sup>                             | B.1.1.7 | 30                       | 0.05              | 2.480                    | 166                         | 385                               | 700                               | 11.7                       | 0.470                        | 70.1                           |
| 039      | 10 <sup>-2</sup>                             | B.1.1.7 | 30                       | 0.05              | 6.232                    | 183                         | 428                               | 1127                              | 15.7                       | 0.967                        | 72.4                           |
| 042      | 10 <sup>-3</sup>                             | D614G   | 10                       | 0.05              | 18.344                   | 219                         | 446                               | 1052                              | 13.9                       | 5.063                        | 79.8                           |
| 043      | 10 <sup>-3</sup>                             | D614G   | 10                       | 0.05              | 17.480                   | 213                         | 449                               | 1281                              | 15.0                       | 5.088                        | 80.8                           |
| 045      | 10 <sup>-3</sup>                             | D614G   | 10                       | 0.05              | 4.184                    | 169                         | 395                               | 1041                              | 6.5                        | 1.162                        | 75.1                           |
| 047      | 10 <sup>-3</sup>                             | D614G   | 10                       | 0.05              | 16.401                   | 205                         | 465                               | 1205                              | 17.9                       | 4.987                        | 81.9                           |
| 055      | 10 <sup>-3</sup>                             | B.1.1.7 | 10                       | 0.05              | 14.771                   | 209                         | 421                               | 1902                              | 10.8                       | 4.630                        | 77.9                           |
| 057      | 10 <sup>-3</sup>                             | B.1.1.7 | 10                       | 0.05              | 17.851                   | 215                         | 442                               | 1172                              | 13.8                       | 5.363                        | 79.9                           |
| 044      | 10 <sup>-3</sup>                             | D614G   | 20                       | 0.05              | 16.067                   | 204                         | 438                               | 1011                              | 19.5                       | 3.751                        | 76.3                           |
| 046      | 10 <sup>-3</sup>                             | D614G   | 20                       | 0.05              | 3.670                    | 159                         | 395                               | 24531                             | 10.4                       | 0.523                        | 84.9                           |
| 048      | 10 <sup>-3</sup>                             | D614G   | 20                       | 0.05              | 16.181                   | 200                         | 462                               | 1081                              | 26.7                       | 4.288                        | 79.7                           |
| 056      | 10 <sup>-3</sup>                             | B.1.1.7 | 20                       | 0.05              | 14.315                   | 207                         | 423                               | 1262                              | 17.4                       | 3.423                        | 75.0                           |
| 058      | 10 <sup>-3</sup>                             | B.1.1.7 | 20                       | 0.05              | 16.959                   | 210                         | 440                               | 1074                              | 20.5                       | 4.133                        | 77.5                           |
| 081      | 10 <sup>-4</sup>                             | B.1.1.7 | 10                       | 0.05              | 17.838                   | 214                         | 498                               | 2827                              | 18.1                       | 5.222                        | 82.9                           |
| 065      | 10 <sup>-4</sup>                             | D614G   | 20                       | 0.05              | 0.205                    | 152                         | 436                               | 853                               | 7.2                        | 0.177                        | 70.1                           |
| 067      | 10 <sup>-4</sup>                             | D614G   | 20                       | 0.05              | 0.102                    | 152                         | 539                               | 1114                              | 13.3                       | 0.086                        | 71.7                           |
| 069      | 10 <sup>-4</sup>                             | D614G   | 20                       | 0.05              | 3.798                    | 145                         | 416                               | 893                               | 17.6                       | 0.981                        | 75.1                           |
| 077      | 10 <sup>-4</sup>                             | B.1.1.7 | 20                       | 0.05              | 0.257                    | 142                         | 376                               | 569                               | 9.5                        | 0.184                        | 70.1                           |
| 079      | 10 <sup>-4</sup>                             | B.1.1.7 | 20                       | 0.05              | 1.426                    | 138                         | 380                               | 662                               | 8.1                        | 0.280                        | 71.0                           |
| 082      | 10 <sup>-4</sup>                             | B.1.1.7 | 20                       | 0.05              | 17.814                   | 207                         | 468                               | 1077                              | 24.5                       | 4.321                        | 78.5                           |
| 066      | 10 <sup>-4</sup>                             | D614G   | 30                       | 0.05              | 0.219                    | 152                         | 420                               | 777                               | 12.2                       | 0.109                        | 74.5                           |
| 068      | 10 <sup>-4</sup>                             | D614G   | 30                       | 0.05              | 0.086                    | 152                         | 507                               | 947                               | 20.3                       | 0.065                        | 71.6                           |
| 070      | 10 <sup>-4</sup>                             | D614G   | 30                       | 0.05              | 3.503                    | 146                         | 403                               | 772                               | 18.5                       | 0.689                        | 72.7                           |
| 078      | 10 <sup>-4</sup>                             | B.1.1.7 | 30                       | 0.05              | 0.159                    | 142                         | 379                               | 528                               | 11.4                       | 0.077                        | 69.5                           |
| 080      | 10 <sup>-4</sup>                             | B.1.1.7 | 30                       | 0.05              | 1.440                    | 139                         | 375                               | 645                               | 8.4                        | 0.160                        | 68.6                           |
| 083      | 10 <sup>-4</sup>                             | B.1.1.7 | 30                       | 0.05              | 16.653                   | 201                         | 448                               | 1002                              | 25.0                       | 3.269                        | 75.6                           |
| 095      | 10 <sup>-5</sup>                             | D614G   | 20                       | 0.05              | 0.042                    | 150                         | 516                               | 919                               | 7.6                        | 0.114                        | 71.3                           |
| 097      | 10 <sup>-5</sup>                             | D614G   | 20                       | 0.05              | 0.093                    | 153                         | 489                               | 856                               | 9.6                        | 0.086                        | 73.0                           |
| 098      | 10 <sup>-5</sup>                             | D614G   | 20                       | 0.05              | 0.048                    | 153                         | 445                               | 695                               | 5.6                        | 0.114                        | 68.9                           |

**Table S3** continued

| Image ID | Titer TCID <sub>50</sub> (mL <sup>-1</sup> ) | Variant | PMT relative voltage (%) | Dye dilution (μM) | Relative signal area (%) | Image mean intensity (a.u.) | Mean of the threshold area (a.u.) | Maximum particle intensity (a.u.) | Average particle size (px) | Particle percentage area (%) | Particle mean intensity (a.u.) |
|----------|----------------------------------------------|---------|--------------------------|-------------------|--------------------------|-----------------------------|-----------------------------------|-----------------------------------|----------------------------|------------------------------|--------------------------------|
| 109      | 10 <sup>-5</sup>                             | B.1.1.7 | 20                       | 0.05              | 0.025                    | 150                         | 407                               | 546                               | 7.6                        | 0.056                        | 71.1                           |
| 111      | 10 <sup>-5</sup>                             | B.1.1.7 | 20                       | 0.05              | 0.065                    | 156                         | 444                               | 764                               | 7.7                        | 0.100                        | 70.7                           |
| 096      | 10 <sup>-5</sup>                             | D614G   | 30                       | 0.05              | 0.038                    | 153                         | 468                               | 800                               | 8.8                        | 0.094                        | 69.8                           |
| 099      | 10 <sup>-5</sup>                             | D614G   | 30                       | 0.05              | 0.075                    | 153                         | 453                               | 746                               | 11.2                       | 0.073                        | 70.4                           |
| 100      | 10 <sup>-5</sup>                             | D614G   | 30                       | 0.05              | 0.039                    | 153                         | 423                               | 615                               | 8.8                        | 0.048                        | 70.2                           |
| 110      | 10 <sup>-5</sup>                             | B.1.1.7 | 30                       | 0.05              | 0.019                    | 150                         | 408                               | 2417                              | 7.5                        | 0.034                        | 77.2                           |
| 112      | 10 <sup>-5</sup>                             | B.1.1.7 | 30                       | 0.05              | 0.044                    | 154                         | 428                               | 647                               | 9.1                        | 0.069                        | 69.7                           |
| 117      | 10 <sup>-6</sup>                             | D614G   | 30                       | 0.05              | 0.045                    | 118                         | 501                               | 742                               | 94.3                       | 0.029                        | 100.0                          |
| 121      | 10 <sup>-6</sup>                             | B.1.1.7 | 30                       | 0.05              | 0.004                    | 147                         | 343                               | 373                               | 7.3                        | 0.018                        | 68.1                           |
| 118      | 10 <sup>-6</sup>                             | D614G   | 40                       | 0.05              | 0.039                    | 118                         | 467                               | 647                               | 86.3                       | 0.026                        | 80.4                           |
| 122      | 10 <sup>-6</sup>                             | B.1.1.7 | 40                       | 0.05              | 0.000                    | 145                         | 330                               | 332                               | 6.3                        | 0.017                        | 67.6                           |
| 134      | Reference                                    | N/A     | 10                       | 0.05              | 0.003                    | 149                         | 330                               | 355                               | 2.5                        | 0.308                        | 70.3                           |
| 136      | Reference                                    | N/A     | 20                       | 0.05              | 0.078                    | 152                         | 562                               | 1341                              | 6.4                        | 0.149                        | 71.3                           |
| 138      | Reference                                    | N/A     | 20                       | 0.05              | 0.076                    | 142                         | 405                               | 586                               | 14.6                       | 0.069                        | 74.8                           |
| 140      | Reference                                    | N/A     | 20                       | 0.05              | 0.017                    | 150                         | 478                               | 695                               | 4.2                        | 0.106                        | 68.3                           |
| 141      | Reference                                    | N/A     | 20                       | 0.05              | 0.016                    | 144                         | 355                               | 424                               | 6.1                        | 0.050                        | 69.8                           |
| 137      | Reference                                    | N/A     | 30                       | 0.05              | 0.001                    | 151                         | 327                               | 328                               | 3.7                        | 0.017                        | 66.6                           |
| 139      | Reference                                    | N/A     | 30                       | 0.05              | 0.064                    | 142                         | 376                               | 480                               | 21.4                       | 0.043                        | 78.9                           |
| 142      | Reference                                    | N/A     | 30                       | 0.05              | 0.014                    | 151                         | 455                               | 624                               | 6.5                        | 0.050                        | 68.3                           |
| 143      | Reference                                    | N/A     | 30                       | 0.05              | 0.007                    | 146                         | 350                               | 386                               | 5.7                        | 0.024                        | 67.0                           |

Table S4. Comparison of in vitro cell culture assays of SARS-CoV-2 infection.

| Method                                          | Advantages                                                                                                                                                                                       | Disadvantages                                                                                                                  | Reference |
|-------------------------------------------------|--------------------------------------------------------------------------------------------------------------------------------------------------------------------------------------------------|--------------------------------------------------------------------------------------------------------------------------------|-----------|
| Quantitative polymerase chain reaction (qPCR)   | <ul style="list-style-type: none"> <li>• Robust</li> <li>• Quick</li> <li>• Quantitative information</li> </ul>                                                                                  | <ul style="list-style-type: none"> <li>• No cellular level information</li> </ul>                                              | 2,3       |
| Immunofluorescence (IF) staining                | <ul style="list-style-type: none"> <li>• Cellular level information</li> <li>• Highly specific signal</li> </ul>                                                                                 | <ul style="list-style-type: none"> <li>• Expensive fluorescent antibodies</li> <li>• Only works after fixation</li> </ul>      | 4,5       |
| SARS-CoV-2 GFP/ $\Delta$ N fluorescence imaging | <ul style="list-style-type: none"> <li>• Cellular level information</li> <li>• Highly specific signal</li> <li>• Imaging of the infection in live cells</li> <li>• BSL2 environment</li> </ul>   | <ul style="list-style-type: none"> <li>• Only works on transgenic cell lines</li> <li>• GFP gene deletion over time</li> </ul> | 6         |
| 2P calcium imaging                              | <ul style="list-style-type: none"> <li>• Cellular level information</li> <li>• Imaging of the infection in live cells</li> <li>• High 3D spatial resolution – subcellular information</li> </ul> | <ul style="list-style-type: none"> <li>• Expensive instrumentation</li> <li>• Derivative signal</li> </ul>                     | This work |

Immunofluorescent (IF) and plaque assays do not fulfil the aims of modern virology and especially do not provide any reproducible and cellular data quantitative means of the same virally infected culture over time. ELISA assays do not provide enough granularity and cannot inform about in-culture spread of the infection. qPCR assays also come with the need of destroying the samples, but most importantly, no host and functional changes are quantified using qPCR in infected cultures. Single cell sequencing<sup>7</sup> allows the tracking of viral sequences and host transcriptome but it comes with the necessary destruction of the investigated sample cellular/organoid entity and there is a large variability by cell, whereas this method inherently destroys the surface overview of cellular spread within the tissue/organoid/cell culture. There is also no possibility of longitudinal investigation of a model organoid over time. Our methodology crucially employs a novel calcium-sensitive dye with unique cell-penetration and sensitivity. This dye can be applied in longitudinal studies and in cell or organoid cultures. As shown in our study, when the BEEF-CP dye is coupled to two-photon microscopy with high spatial and temporal resolution, quantitation with appropriate software and analysis reveals surprising distinction possibilities. Our approach was to analyse numerous parameters within individual cells. This technique allows for the simultaneous assessment of viral replication, host cell responses, and morphological changes, providing a comprehensive understanding of virus infection dynamics in cell culture.



## ImageJ script

---

```
run("Set Measurements...", "area mean min area_fraction limit display redirect=None decimal=2");
run("Clear Results");

//select directory of images to open
5 input = getDirectory("Input directory where images are stored");

//select location where images/results are to be stored
output = getDirectory("Output ditrectory for results");

10 //gets list of files
list = getFileList(input);

//arrays
Image_mean=newArray(list.length);
15 //loop for opening images
for (image=0;image<list.length;image++){
full = input + list[image];
open(full);
20 fn=getTitle();
roiManager("reset");
run("Select None");

25 run("Duplicate...", "title=mask duplicate");
run("Despeckle", "stack");
//run("Threshold...");
setThreshold(320, 65535);//set threshold limit for image set
run("Measure");
30 Image_mean[image]=getValue("Mean");

run("Create Selection");
if (selectionType!=-1){
roiManager("Add");
35 }

//particle measure
selectWindow("mask");
resetThreshold();
40 run("Select None");
run("Duplicate...", "title=mask2");
run("Gaussian Blur...", "sigma=5");//blurr command
imageCalculator("Subtract create", "mask","mask2");
selectWindow("Result of mask");
45 rename(fn+" particles");
setThreshold(62, 65535);//set threshold limit for image set
run("Analyze Particles...", "summarize exclude");

run("Create Selection");
50 if (selectionType!=-1){
roiManager("Add");
}

selectWindow(fn);
55 roiManager("select", 0);
roiManager("Set Color", "red");
roiManager("select", 1);
roiManager("Set Fill Color", "green");
roiManager("Show All without labels");
60 //save drawing or image
out = output + fn + " Overlay";
saveAs("Tiff",out);
run("Close All");
65 }

Thresholded_mean=Table.getColumn("Mean");
Percent_area=Table.getColumn("%Area");
Max_Intensity=Table.getColumn("Max");
70 selectWindow("Results");
```

```

run("Close");

Table.create("Image data");
Table.setLocationAndSize(200, 200, 800, 600);
75 Table.setColumn("Image", list);
Table.setColumn("Signal % area", Percent_area);
Table.setColumn("Image Mean intensity", Image_mean);
Table.setColumn("Mean of thresholded area", Thresholded_mean);
Table.setColumn("Max intensity", Max_Intensity);
80
//save results file
selectWindow("Image data");
out = output + "Image data.xls";
saveAs("Results",out);
85
selectWindow("Summary");
IJ.renameResults("particle data");
out = output + " particle data.xls";
saveAs("Results",out);
90
run("Set Measurements...", "area mean min area_fraction display redirect=None decimal=2");

```

## Microbiological assay results

### Cytotoxicity assay

The toxicity characteristic of the Ca-ion sensor BEEF-CP was studied by cell viability experiments on two cell lines, such as A431 and HEK, showed in **Figure S13**, on a Perkin Elmer EnSpire Multimode Plate Reader with the standard protocol (PrestoBlu Cell Viability Reagent from Invitrogen, 10 min incubation). Parallel with the dye, the solvent applied (DMSO) was also included in the studies as reference. For both cell line, the toxicity trends break down above 8  $\mu\text{M}$  dye concentration and the IC<sub>50</sub> values are around 11 and 15  $\mu\text{M}$ . These concentration values, however, are much higher than the concentration applied during this study (final concentration of BEEF-CP is 0.5  $\mu\text{M}$  and 0.05  $\mu\text{M}$ , as using 10  $\mu\text{l}$  of dye (10  $\mu\text{M}$  or 1  $\mu\text{M}$ ) in original stock, diluted to 200  $\mu\text{l}$  in the vial, respectively), consequently we are at the non-toxic region.

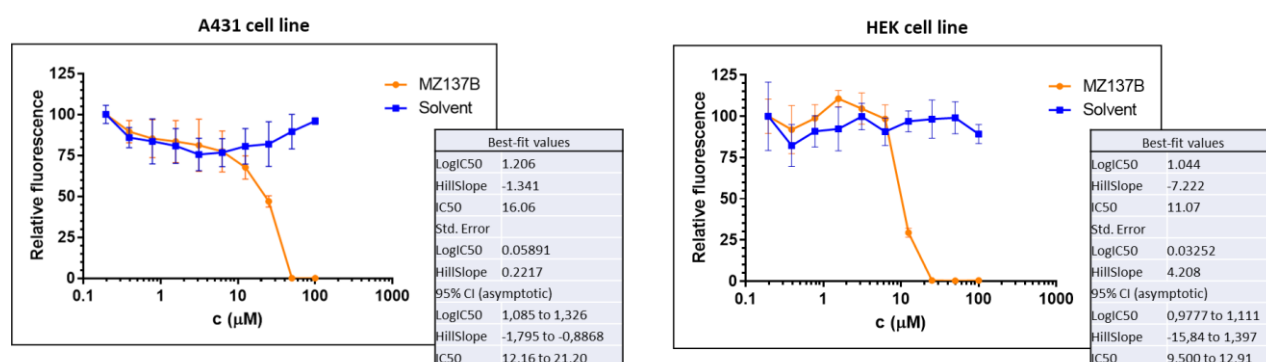

**Fig S16.** Graphical representation of cytotoxicity assays on A431 (left) and HEK (right) cell lines. The orange curves summarize the measured cell viability values with different concentration of calcium indicator (BEEF-CP) in comparison with the parallel experiments solvent applied (DMSO).

Parallely to the cell viability experiment, an alternate cytotoxicity assay using uninfected 80% confluence VeroE6 cells incubated for 24 hours in the presence of the medium containing 0.5  $\mu\text{M}$  concentration BEEF-CP solution, a dedicated spectrophotometer (Omni cell adhesion light spectrometer, Cytosmart, Netherlands) was used. The percentage rate of surface covered by monolayers and of transparent surface (plaques appearing in the absence of cells killed by the dye) in all the wells of the 96-well cell culture platform were determined. All tests were made in triplicates.

## Flow cytometry measurement results

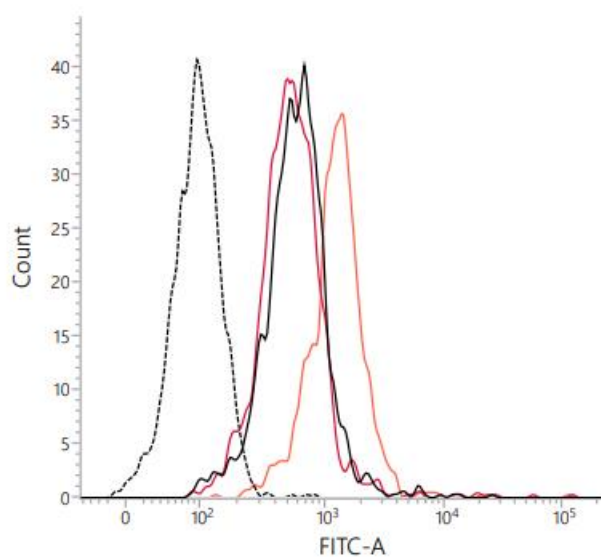

**Fig. S17. Results of the flow cytometry measurement.** Dotted black line: untreated cells; Solid black line: BEEF-CP treated cells; solid orange line: ionomycin + BEEF-CP treated cells; solid red line: EGTA + BEEF-CP treated cells.

**Table S5. Tabulated summary of the flow cytometry measurements.**

|                          | Fluorescence Intensity Mean (a.u.) |            |       | Ratio (-)               |                    |                             |
|--------------------------|------------------------------------|------------|-------|-------------------------|--------------------|-----------------------------|
|                          | Untreated                          | +Ionomycin | +EGTA | Ionomycin/<br>Untreated | EGTA/<br>Untreated | (Ion./Unt.)/<br>(EGTA/Unt.) |
| <b>HEK-293 control</b>   | 108                                | 189        | 104   | 1.75                    | 0.96               | 1.82                        |
| <b>HEK-293 + BEEF-CP</b> | 784                                | 1601       | 911   | 2.04                    | 1.16               | 1.76                        |

## Synthetic methods and results

---

### General synthetic methodologies and characterization

All the starting materials, reagents and solvents were purchased from Sigma-Aldrich (Merck) in reagent grade and used as received. NMR solvents were purchased from Eurisotop. Reactions were monitored by LC-MS (Shimazu MS2020, Supelco Ascentis, 2.0 × 50 mm, 2.1 μm C18 column; injection of 1 μl; 5–98% MeCN/H<sub>2</sub>O, linear gradient, with constant 0.1% v/v TFA additive; run of 6 min; flow of 0.8 ml min<sup>-1</sup>; ESI; positive ion mode). Reaction products were purified by gradient elution preparative HPLC (HPLC Gilson 333 instrument, UV detector 220 nm) on a Phenomenex Gemini C18, 250×50.00 mm; 10 μm, 110A column using 0.2% v/v TFA in water and acetonitrile as the mobile phase components.

<sup>1</sup>H NMR and <sup>13</sup>C NMR spectra were recorded at 600/400 MHz, 151/101 MHz on Bruker Avance 600 or 400 spectrometers. All chemical shifts are quoted in parts per million (ppm), measured from the center of the signal except in the case of multiplets, which are quoted as a range. <sup>1</sup>H NMR and <sup>13</sup>C chemical shifts are referenced to the residual solvent peak of (CD<sub>3</sub>)<sub>2</sub>SO (<sup>1</sup>H referenced to 2.50 ppm and <sup>13</sup>C referenced to 39.52 ppm) or CDCl<sub>3</sub> (<sup>1</sup>H referenced to 7.26 ppm and <sup>13</sup>C referenced to 77.16 ppm). Coupling constants are given with an accuracy of 0.1 Hz. Splitting patterns are abbreviated as follows: singlet (s), doublet (d), triplet (t), quartet (q), multiplet (m), broad singlet (bs) and combinations thereof. Assignment of spectra was aided by 2D NMR spectroscopy (<sup>1</sup>H-<sup>13</sup>C HSQC and HMBC).

HRMS and MS-MS analyses were performed on a Thermo Velos Pro Orbitrap Elite (Thermo Fisher Scientific) system. The ionization method was ESI operated in positive (or negative) ion mode. The protonated (or deprotonated) molecular ion peaks were fragmented by collision-induced dissociation (CID) at a normalized collision energy of 40-65%. For the CID experiment helium was used as the collision gas. The samples were dissolved in methanol. Data acquisition and analysis were accomplished with Xcalibur software version 4.0 (Thermo Fisher Scientific).

## Synthesis of BEEF-CP

The preparation of the calcium dye was carried out in a five-step synthetic route using 4-ethyl resorcinol, 1,2,4-benzenetricarboxylic anhydride and tetraethyl BAPTA<sup>8</sup> in high overall yield.

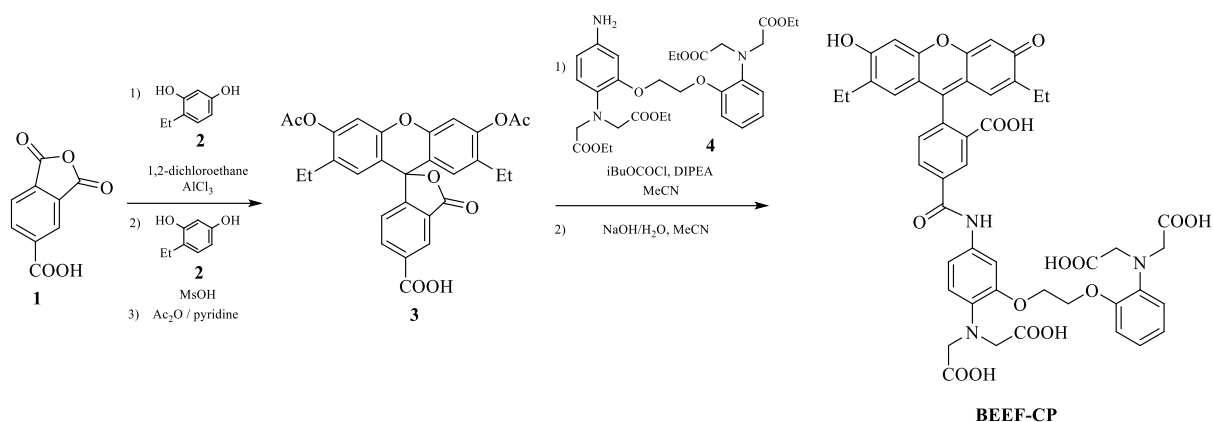

## Synthesis of ketone 5

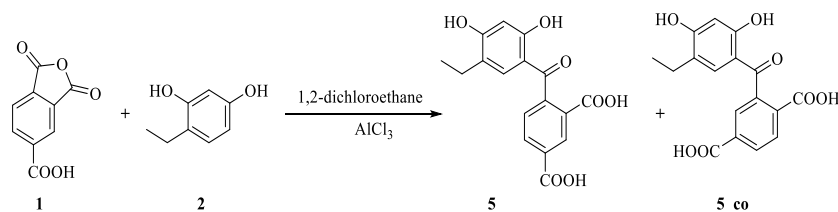

4-Ethylresorcinol (**2**, 1.38 g, 10.0 mmol, 1.0 equiv.) and 1,2,4-benzenetricarboxylic anhydride (**1**, 2.11 g, 11.0 mmol, 1.1 equiv.) were dissolved in 1,2-dichloroethane (55.0 mL).  $\text{AlCl}_3$  (7.99 g, 60 mmol, 6.0 equiv.) was added, the mixture was stirred for 72 hours at room temperature. The solvent was evaporated, 100 mL of EtOAc, then 50 mL of aqueous HCl (4M) were added then the layers were separated. The aqueous phase was washed with EtOAc ( $3 \times 100$  mL), the combined organic layers was washed with aqueous HCl (1M, 50 mL), brine (50 mL), dried over  $\text{MgSO}_4$ . The solvent was evaporated under reduced pressure. The residue (3.51 g) was purified by preparative HPLC (water–acetonitrile–0.1% TFA, using the gradient method). After purification, the fractions were lyophilized. The target isomer (**5**, 1.49 g, yield 45%) and its regioisomer (**5<sub>co</sub>** 1.02 g, yield 31%) were isolated as a yellow powder.

### Spectroscopic data of **5**

$^1\text{H}$  NMR (400 MHz,  $\text{DMSO}-d_6$ )  $\delta$  13.26 (s, 2H), 11.86 (s, 1H), 10.62 (s, 1H), 8.50 (d,  $J = 1.6$  Hz, 1H), 8.21 (dd,  $J = 7.9, 1.7$  Hz, 1H), 7.54 (d,  $J = 7.9$  Hz, 1H), 6.80 (s, 1H), 6.39 (s, 1H), 2.34 (q,  $J = 7.4$  Hz, 2H), 0.95 (t,  $J = 7.5$  Hz, 3H).  $^{13}\text{C}$  NMR (101 MHz,  $\text{DMSO}-d_6$ )  $\delta$  198.9, 166.0, 163.1, 162.4, 143.8, 132.6, 132.4, 131.8, 130.5, 130.0, 127.9, 122.7, 112.7, 102.2, 21.7, 13.8. HR-MS:(ESI) calcd. for  $\text{C}_{17}\text{H}_{13}\text{O}_7$  329.0667  $[\text{M}-\text{H}]^+$ , found 329.06700, Df. = 1.0 ppm. HR-ESI-MS-MS (CID=40%; rel. int. %): 285(2); 191(100) and 147(9).

### Spectroscopic data of **5<sub>co</sub>**

$^1\text{H}$  NMR (400 MHz,  $\text{DMSO}-d_6$ )  $\delta$  8.15 (dd,  $J = 8.1, 1.7$  Hz, 1H), 8.06 (d,  $J = 8.1$  Hz, 1H), 7.85 (d,  $J = 1.6$  Hz, 1H), 6.83 (s, 1H), 6.39 (s, 1H), 2.35 (q,  $J = 7.4$  Hz, 2H), 0.96 (t,  $J = 7.5$  Hz, 3H).  $^{13}\text{C}$  NMR (101 MHz,  $\text{DMSO}-d_6$ )  $\delta$  198.7, 166.4, 166.0, 163.0, 162.5, 140.2, 133.8, 133.8, 132.4, 130.2, 130.1, 127.9, 122.6, 112.8, 102.2, 21.7, 13.8.

### Synthesis of unprotected fluorescein derivative 6

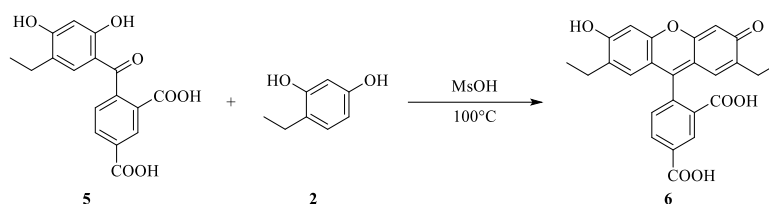

**5** (0.90 g, 2.73 mmol, 1.0 equiv.) and 4-ethylresorcinol (**2**, 628 mg, 3.27 mmol, 1.2 equiv.) were dissolved in methanesulfonic acid (6 mL) and stirred for 2 hours at 100 °C. The mixture was poured carefully to crushed ice (100 g), and the formed solid orange precipitate was filtered off and dried. 1.12 g (95%) orange solid product (**6**) was formed and used without further purification.

$^1\text{H}$  NMR (400 MHz,  $\text{DMSO-}d_6$ )  $\delta$  10.11 (bs, 1H), 8.42 (s, 1H), 8.29 (dd,  $J = 8.0, 1.5$  Hz, 1H), 7.38 (d,  $J = 8.0$  Hz, 1H), 6.74 (bs, 2H), 6.45 (bs, 2H), 2.36 (q,  $J = 7.5$  Hz, 4H), 0.93 (t,  $J = 7.5$  Hz, 6H).  $^{13}\text{C}$  NMR (101 MHz,  $\text{DMSO-}d_6$ )  $\delta$  167.8, 166.1, 156.1, 150.3, 135.9, 132.7, 129.1, 127.6, 120.3, 102.3, 101.8, 22.4, 14.1. HR-MS:(ESI) calcd. for  $\text{C}_{25}\text{H}_{21}\text{O}_7$  433.12818  $[\text{M}+\text{H}]^+$ , found 433.12787, Df. = -0.7 ppm. HR-ESI-MS-MS (CID=65%; rel. int. %): 418(100); 405(25); 390(20) and 373(20).

### Acylation of the fluorescein derivative 6

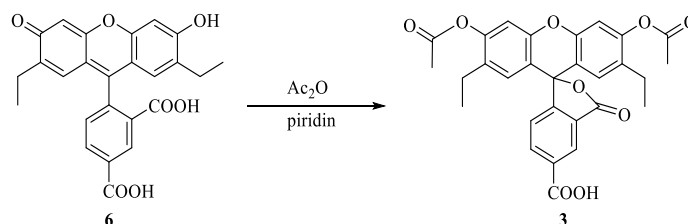

**6** (1.10 g, 2.54 mmol, 1.0 equiv.) was dissolved in acetic anhydride (3.50 mL, 3 equiv.) and pyridine (0.71 mL) was added than the mixture was stirred at 100 °C for 60 minutes. The mixture was cooled down to room temperature than poured carefully to crashed ice (100 g). The product was extracted with EtOAc ( $3 \times 100$  mL), the combined organic phases was washed with distilled water ( $2 \times 200$  mL), saturated sodium carbonate ( $2 \times 200$  mL) aqueous hydrochloric acid (1M,  $1 \times 50$  mL), distilled water ( $1 \times 200$  mL) and brine ( $1 \times 100$  mL). The solvent was dried over  $\text{MgSO}_4$ , evaporated under reduced pressure. 621 mg (47%) product (**3**) was isolated as a yellow solid.

$^1\text{H}$  NMR (400 MHz,  $\text{DMSO-}d_6$ )  $\delta$  13.63 (bs, 1H), 8.27 (dd,  $J = 7.9, 1.2$  Hz, 1H), 8.18 (dd,  $J = 7.9, 0.8$  Hz, 1H), 7.78 (dd,  $J = 1.2, 0.8$  Hz, 1H), 7.25 (s, 2H), 6.76 (s, 2H), 2.38 (m, 4H), 2.33 (s, 6H), 0.92 (t,  $J = 7.5$  Hz, 6H).  $^{13}\text{C}$  NMR (101 MHz,  $\text{DMSO-}d_6$ )  $\delta$  168.9, 167.7, 166.0, 152.4, 150.3, 148.9, 137.5, 132.3, 131.3, 128.9, 128.1, 125.7, 124.5, 115.8, 111.2, 81.6, 22.1, 20.6, 14.3. HR-MS:(ESI) calcd. for  $\text{C}_{29}\text{H}_{26}\text{O}_9$  517.14931  $[\text{M}+\text{H}]^+$ , found 517.14944.

### N-acylation of amino BAPTA moiety using **3**

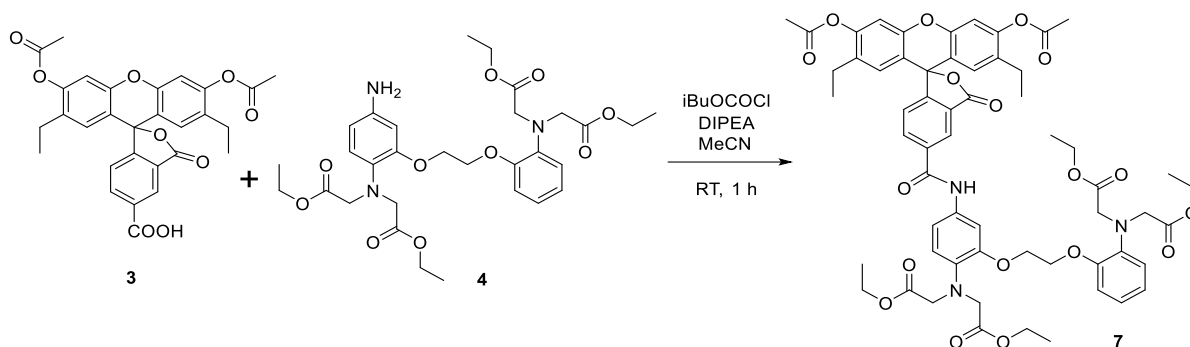

Tetraethyl ester **3** (156 mg, 0.302 mmol, 1.0 equiv.) was dissolved in dry dichloromethane (5 mL) diisopropylethylamine (0.049 mL, 0.605 mmol, 2.0 equiv.) was added. The mixture was cooled down to 0°C. Isobutyl chloroformate (0.038 mL, 0.29 mmol, 0.95 equiv.) was added, and the mixture was stirred at room temperature for 60 minutes. 219 mg (0.363 mmol, 1.2 equiv.) of amino BAPTA derivative (**4**)<sup>9</sup> was added, and the mixture was stirred overnight. The mixture was poured into distilled water (40 mL), the product was extracted with EtOAc (6 × 50 mL), the combined organic phases was washed with saturated sodium hydrogen carbonate (1 × 50 mL) and brine (1 × 100 mL). The solvent was dried over  $\text{MgSO}_4$ , evaporated under reduced pressure. The residue (405 mg) was purified by preparative HPLC (water–acetonitrile–0.1% TFA, using the gradient method). After purification, the fractions were lyophilized. The product (**7**, 170 mg, yield 51%) was isolated as a yellow powder.

$^1\text{H}$  NMR (400 MHz,  $\text{CDCl}_3$ )  $\delta$  8.69 (bs, 1H), 8.56 (bs, 1H), 8.58 (s, 1H) 8.29 (dd,  $J = 8.0, 1.7$  Hz, 1H), 8.21 (m, 1H), 8.11 – 8.01 (m, 5H), 7.54 – 7.49 (m, 1H), 7.36 – 7.27 (m, 2H), 7.03 (s, 1H), 6.91 – 6.82 (m, 2H), 6.62 (s, 1H), 4.15 – 4.13 (m, 4H), 4.67 (s, 8H), 4.16 (qd,  $J = 7.4$  Hz, 3.0 Hz, 8H), 2.45 – 2.36 (m, 4H), 2.36 – 2.32 (m, 6H), 1.25 – 1.12 (m, 12H), 1.01 (t,  $J = 7.5$  Hz, 6H).  $^{13}\text{C}$  NMR (101 MHz,  $\text{CDCl}_3$ )  $\delta$  172.0, 171.7, 169.1, 168.8, 165.6, 165.6, 155.7, 150.6, 150.5, 150.4, 149.8, 137.4, 135.0, 134.3, 133.8, 133.8, 132.4, 131.4, 130.4, 129.9, 129.8, 129.0, 128.2, 126.7, 124.9, 121.7, 119.4, 119.3, 115.9, 113.2, 111.3, 63.2, 63.1, 61.2, 61.1, 53.9, 23.2, 21.0, 14.3, 14.2, 14.2. HR-MS:(ESI) calcd. for  $\text{C}_{59}\text{H}_{64}\text{N}_3\text{O}_{18}$  1102.41794  $[\text{M}+\text{H}]^+$ , found 1102.41960. HR-ESI-MS-MS (CID=40%; rel. int. %): 1060(25); 1028(100) and 986(8).



### Hydrolysis of **7** using aqueous sodium hydroxide

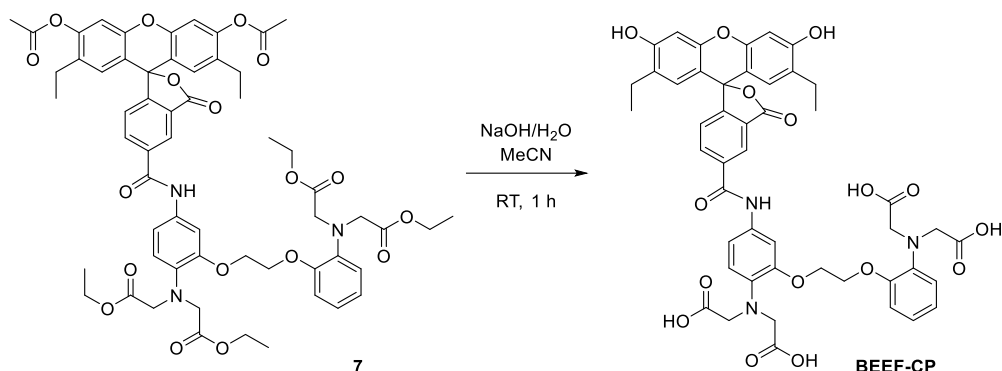

**7** (130 mg, 0.118 mmol, 1.0 equiv.) was dissolved in methanol (2 mL). Sodium hydroxide (50 mg, 125 mmol, 11 equiv.) in water (0.40 mL) was added at 0 °C, the mixture was stirred at room temperature for 60 minutes. The mixture was diluted to 5 mL with ethanol/acetonitrile 1/1 and was purified by preparative HPLC (water–acetonitrile–0.1% TFA, using the gradient method). After purification, the combined fractions were lyophilized. The product (**BEEF-CP**, 88 mg, yield 82%) was isolated as a yellow powder in high purity (>98%, HPLC).

<sup>1</sup>H NMR (600 MHz, DMSO-*d*<sub>6</sub>) δ 12.38 (bs, 2H), 10.41 (s, 1H), 10.12 (bs, 2H), 8.58 (s, 1H), 8.32 (dd, *J* = 8.0, 1.7 Hz, 1H), 7.46 (d, *J* = 2.3 Hz, 1H), 7.40 (d, *J* = 8.1 Hz, 1H), 7.37 – 7.33 (m, 1H), 7.02 – 7.00 (m, *J* = 9.6 Hz, 1H), 6.89 – 6.83 (m, 2H), 6.80 (d, *J* = 8.8 Hz, 1H), 6.78 – 6.75 (m Hz, 1H), 6.72 (s, 2H), 6.40 (s, H), 4.32 – 4.26 (m, 4H), 4.06 (s, 8H), 2.37 (ddp, *J* = 21.7, 14.7, 7.4 Hz, 4H), 0.94 (t, *J* = 7.5 Hz, 6H). <sup>13</sup>C NMR (151 MHz, DMSO-*d*<sub>6</sub>) δ 172.4, 168.2, 163.4, 158.2, 158.0, 145.0, 149.5, 149.5, 139.4, 136.6, 135.6, 132.8, 127.3, 121.5, 121.2, 118.5, 118.4, 115.0, 113.5, 108.6, 107.5, 101.8, 67.2, 67.1, 53.5, 22.4, 14.2. HR-MS:(ESI) calcd. for C<sub>47</sub>H<sub>44</sub>N<sub>3</sub>O<sub>16</sub> 906.27161 [M+H]<sup>+</sup>, found 906.27247. HR-ESI-MS-MS (CID=40%; rel. int. %): 848(100); 816(21); 728(9); 593(9) and 433(3).

## Spectroscopic characterization of BEEF-CP

### Single-photon absorption and emission of BEEF-CP

**UV-Vis absorption spectra** in the wavelength range of 220–700 nm were recorded on a Thermo Scientific Evolution 220 spectrometer in a quartz cuvette (pathlength = 1.0 cm). The general sample preparation protocol involved the dissolution of 1–3 mg of the studied compounds in 50.0 mL MOPS buffer (pH = 7.20) and then a dilution to the suitable concentrations ( $1.0\text{--}8.8\times 10^{-5}$  M) based on the UV-Vis absorption properties of the compounds. The spectrum of the pure solvent was subtracted from the sample spectra. Using the corrected spectra, the molar absorbance ( $\epsilon$ ) at a specific wavelength value was calculated, and the position of a selected absorption band ( $\lambda_{\text{max}}$ ) and the full molar absorption spectra of the compounds were determined.

**Fluorescence emission data** were measured on a Hitachi F-4500 spectrophotometer in a quartz cell with 1.0 cm pathlength. Slit widths were selected to provide 5 nm and 10 nm bandpass for the excitation and emission beams, respectively. Emission data were normalized to the intensity of a probe body, as an external reference, recorded every day. Solvent background spectra (emission spectra or excitation scans) were subtracted from the spectra of samples. Sample solutions were prepared by dilutions from the stock solutions used for the recording of the UV/Vis absorption spectra. The final concentration of the solutions prepared for fluorescence experiments was around 5  $\mu\text{M}$ . The compounds were excited at their absorption maxima ( $\lambda_{\text{max}}$ ) determined during UV/Vis absorption measurements. Quantum yields were calculated by ratiometric method.<sup>10</sup>

**Table S6.** Spectroscopic parameters of **BEEF-CP** without  $\text{Ca}^{2+}$  or in the presence of calcium ion in aqueous media.

|                                                             | Absorption                     |                                              | Emission                       |                          | $QY^a$ | $I_{\text{EM,max}} - I_{\text{EX}}$<br>(nm) |
|-------------------------------------------------------------|--------------------------------|----------------------------------------------|--------------------------------|--------------------------|--------|---------------------------------------------|
|                                                             | $\lambda_{\text{max}}$<br>(nm) | $\epsilon$ ( $\text{M}^{-1}\text{cm}^{-1}$ ) | $\lambda_{\text{EM,max}}$ (nm) | $I_{\text{max}}$<br>(mM) |        |                                             |
| <b>BEEF-CP</b> <sup>b</sup>                                 | 504                            | 58600                                        | 534                            | 252                      | 0.141  | 30                                          |
| <b>[BEEF-CP – <math>\text{Ca}^{2+}</math>]</b> <sup>c</sup> | 504                            | 57900                                        | 535                            | 917                      | 0.548  | 31                                          |

<sup>a</sup>Quantum yields (QY) were determined using fluorescein in HEPES buffer (pH = 7.4) as a reference.

<sup>b</sup>The measurements are carried out in water using MOPS buffer (pH = 7.20) and 100 mM KCl in the presence of EGTA (10.0 mM).

<sup>c</sup>The measurements are carried out in water using MOPS buffer (pH = 7.20) and 100 mM KCl in the presence of EGTA (10.0 mM) and  $\text{CaCl}_2$  (10.0 mM).

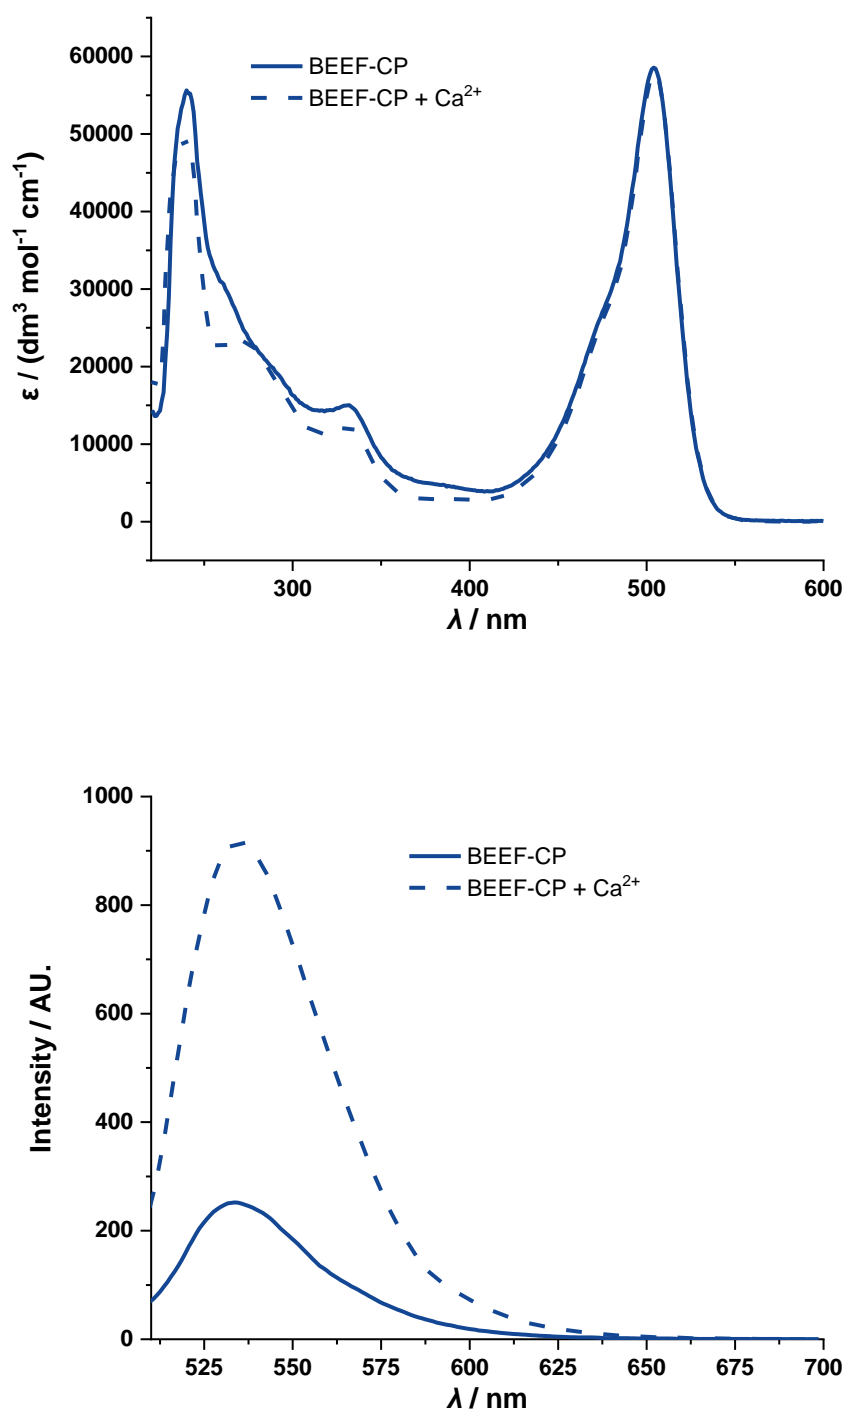

**Fig. S18.** Comparison of the molar UV-Vis absorption (top) and fluorescence emission (bottom) spectra (normalized to  $c = 1.0 \mu\text{M}$  concentrations) of BEEF-CP in water using MOPS buffer ( $\text{pH} = 7.20$ ) and 100 mM KCl in the presence of EGTA (10.0 mM) without calcium ion (solid line) or in the presence of  $\text{Ca}^{2+}$  (10.0 mM) (dashed line). Excitation was carried out at 504 nm.

### Determination of dissociation constant ( $K_d$ ) of fluorescent calcium indicator BEEF-CP

Fluorescence-monitored  $\text{Ca}^{2+}$  titrations were executed by using a solution of the selected dye molecule containing the  $\text{Ca}^{2+}$ -buffer EGTA in a concentration of 0.01 M but no  $\text{Ca}^{2+}$  ions. These starting solutions were made by the dilution of the stock solution of the dye into 'Buffer A'. Another solution, containing the dye in the same concentration, was also prepared by using 'Buffer B'. This latter solution contained the  $\text{Ca}^{2+}$  buffer EGTA and  $\text{Ca}^{2+}$  ions at identical, 0.01 M concentration, setting the free  $\text{Ca}^{2+}$  level to 37  $\mu\text{M}$ . For the measurement of the first (0 M) point of the titration curve 2.0 mL of the sample made with 'Buffer A' was used. In the titration process various (typically increasing) volume fractions of the sample were replaced by the same volumes of the solution made with 'Buffer B'. Fine details of this fluorescence titration protocol have been described previously<sup>11,12</sup>. The recorded spectra are shown in Fig. S14 and the fluorescence intensities versus the  $\log[\text{Ca}^{2+}]_{\text{free}}$  are shown in Fig. S16. The  $K_d$  value of **BEEF-CP** determined using this method is 175.6 nM.

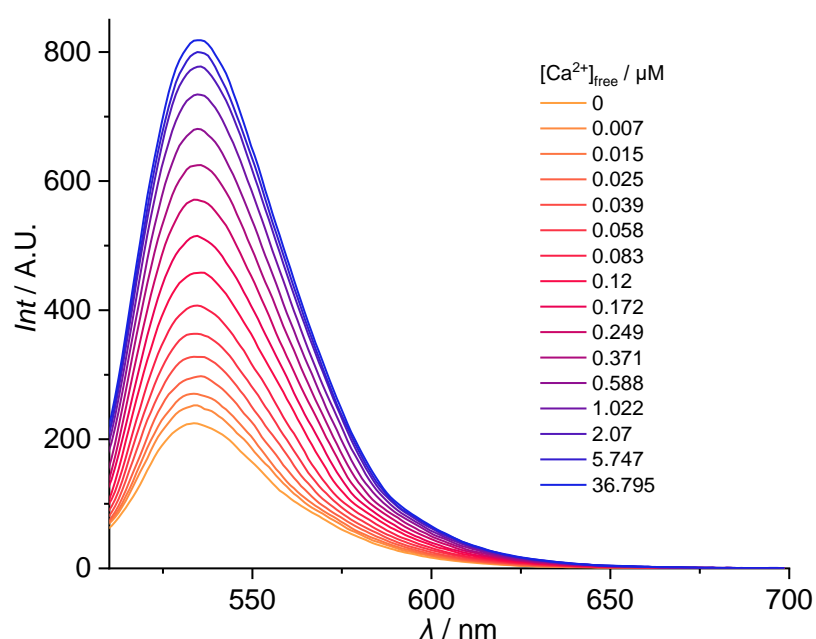

**Fig. S19. Emission spectra of BEEF-CP** recorded in the presence of different free  $\text{Ca}^{2+}$  concentrations in MOPS buffer (pH = 7.2) containing 100 mM KCl.

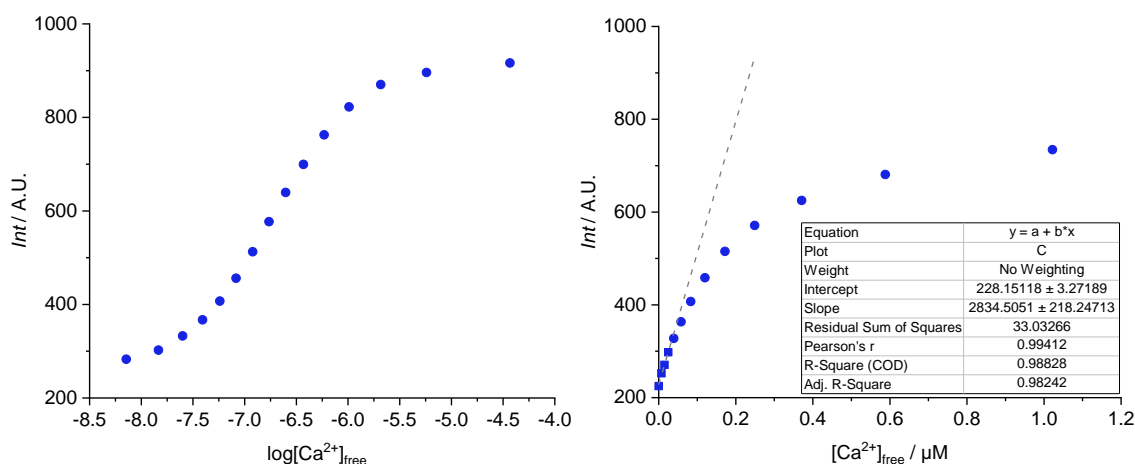

**Fig. S20. Calcium titration curves** used for the determination of the dissociation constant ( $K_d$ ) constant of the calcium complex of compound **BEEF-CP**. At free  $\text{Ca}^{2+}$  concentrations much lower than  $K_d$ , the intensity changes linearly with the free  $\text{Ca}^{2+}$  concentration. The data points used for the linear fitting are indicated with squares in the right panel.

#### pH sensitivity of the fluorescent sensor **BEEF-CP**

0.8 mg of **BEEF-CP** was dissolved in DMSO to obtain a stock solution. pH Buffers for the range of 3–9 based on NaOAc/AcOH (pH 3–5) or Na-HEPES/HEPES (pH 6–9) were prepared in the concentration of 5 mM. The ionic strength was set to 50 mM by the addition of KCl and either 1.5 mM EGTA or 1.5 mM  $\text{CaCl}_2$  was dissolved in the solution. The fluorescent spectra of **BEEF-CP** have been recorded using a Shimadzu 1900 spectrophotometer in each  $\text{Ca}^{2+}$ -containing and  $\text{Ca}^{2+}$ -free pH buffer. The used excitation wavelength was 504 nm, both the excitation and emission slits were set to 5 nm. The spectra were recorded at a scan speed of 2000 nm/min by recording datapoints every in 0.5. nm. The instrument was used in low sensitivity mode. The emission intensity values were plotted against for pH in both the  $\text{Ca}^{2+}$ -containing and  $\text{Ca}^{2+}$ -free solutions shown in Fig. S18.

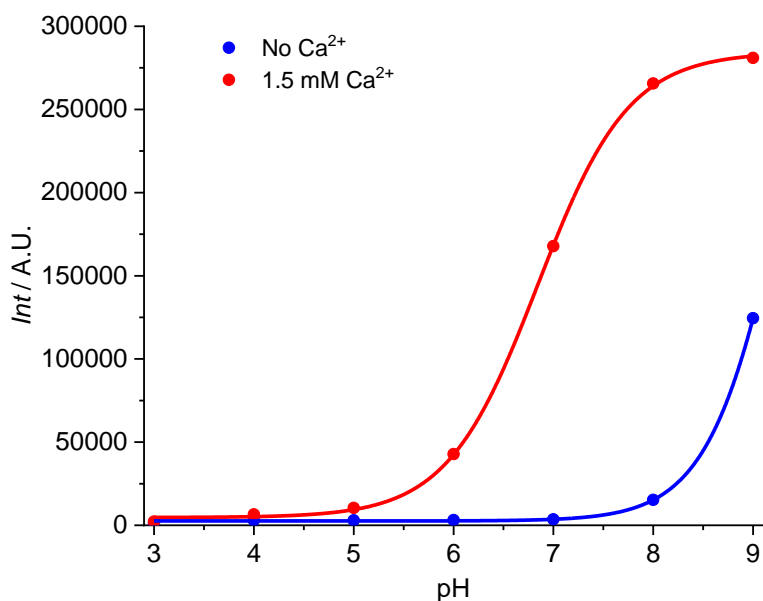

**Fig. S21. Emission intensity of probe **BEEF-CP**** measured in solutions containing no  $\text{Ca}^{2+}$  or 1.5 mM  $\text{Ca}^{2+}$  at different pH values.

### Ion-selectivity of the fluorescent sensor BEEF-CP

The fluorescence spectra of 50 mM pH = 7.4 HEPES solutions containing 1 mM of different metal salts (NaCl, KCl, MgCl<sub>2</sub>, CaCl<sub>2</sub>, Zn(OTf)<sub>2</sub>, MnCl<sub>2</sub>, FeCl<sub>2</sub>, FeCl<sub>3</sub>, CuSO<sub>4</sub>, NiCl<sub>2</sub>) and 10 μM BEEF-CP were recorded. The free solution contained 1 mM EGTA to capture any free ion in the solution. The area under the curve of the Ca<sup>2+</sup> containing solution was normalized and the areas under the curve of the other solutions were compared to that as shown in Fig. S22. The selectivity of the sensor is similar to other BAPTA-type sensors, mainly showing turn-on for Zn<sup>2+</sup> and Mn<sup>2+</sup>.

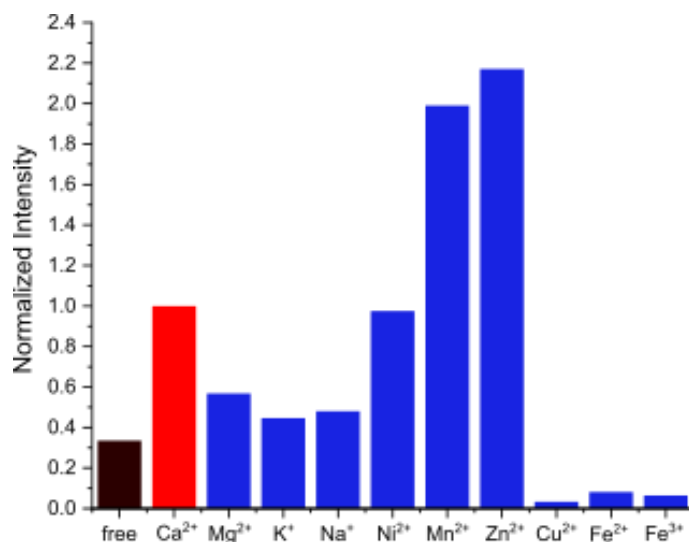

**Fig. S22.** Normalized emission intensity of BEEF-CP measured in aqueous solutions (pH = 7.4 HEPES) containing 1 mM of different metal salts. (NaCl, KCl, MgCl<sub>2</sub>, CaCl<sub>2</sub>, Zn(OTf)<sub>2</sub>, MnCl<sub>2</sub>, FeCl<sub>2</sub>, FeCl<sub>3</sub>, CuSO<sub>4</sub>, NiCl<sub>2</sub>)

## Two-photon action cross-section measurements

**The two-photon action cross section (TPCS)** was determined with the two-photon excited fluorescence (TPEF) method<sup>13</sup>. The measurements were performed using an inverted two-photon microscope (FemtoSmart2D, Femtonics), equipped with a XLUMPFLN20XW Olympus objective (numerical aperture; NA = 1.0) and a tunable high-power Ti:Sapphire laser (Coherent Chameleon Ultra II, wavelength of the excitation light is between 700 nm and 1050 nm). The incident light source was focused into a capillary filled with either the sample or the reference solution (Rhodamine 6G in MeOH<sup>14</sup>) and integrated fluorescence emission was detected in a wavelength window from 500 to 550 nm (green channel of the microscope). The power of the laser source was kept constant at 32 mW. TPCS at each excitation wavelength was calculated according to the following equation:

$$TPCS_{sam} = TPCS_{ref} \cdot \frac{A_{sam} \cdot c_{ref} \cdot a_{ref} \cdot n_{D,ref}}{A_{ref} \cdot c_{sam} \cdot a_{sam} \cdot n_{D,sam}}$$

where  $A$  is the mean TPEF emission intensity,  $c$  is the concentration of the dye,  $n$  is the refractive index of the solvent measured at the sodium D-line;  $a$  is a ratio derived from one-photon emission measurements calculated as the integral of one-photon emission spectrum from 500 to 550 nm divided by the total one-photon emission spectrum integral,  $ref$  is reference,  $sam$  is sample. The dye concentrations were 10  $\mu$ M, in pH = 7.4 HEPES (50 mM). To investigate the  $Ca^{2+}$  complex the dye was studied in a solution also containing 1 mM  $CaCl_2$  and to study the free dye a solution containing 1 mM EGTA was used. The 2P action cross section spectra resemble the literature spectra of fluoresceins, with a slight bathochromic shift.<sup>15</sup> As shown in Fig. S2, the brightness with constant modulation was the highest at 700 nm in the biological sample, which may be explained by the sample itself and the performance profile of the light source. Since the dye has one of its two-photon absorption peaks at this wavelength, we chose it for the biological experiments. At 700 nm the two-photon signal is dominating the signal, as for single photon image the spatial resolution would be degraded (see Fig. S1e).

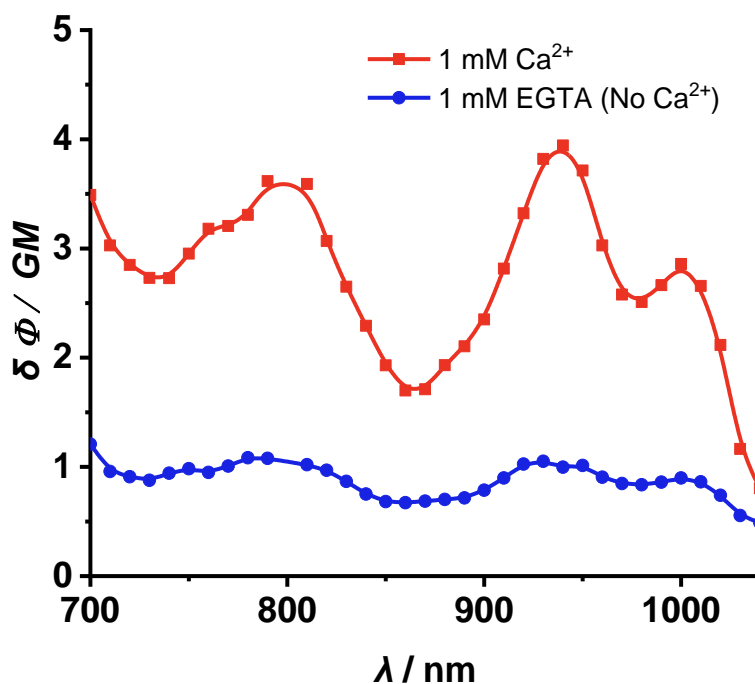

**Fig. S23. Two-photon cross section of BEEF-CP** in HEPES buffer at pH = 7.4 in the presence of 1 mM  $Ca^{2+}$  (red) or without  $Ca^{2+}$  in the presence of 1 mM EGTA. GM: Goepfert-Mayer unit.

## NMR spectra of the synthesized novel compounds

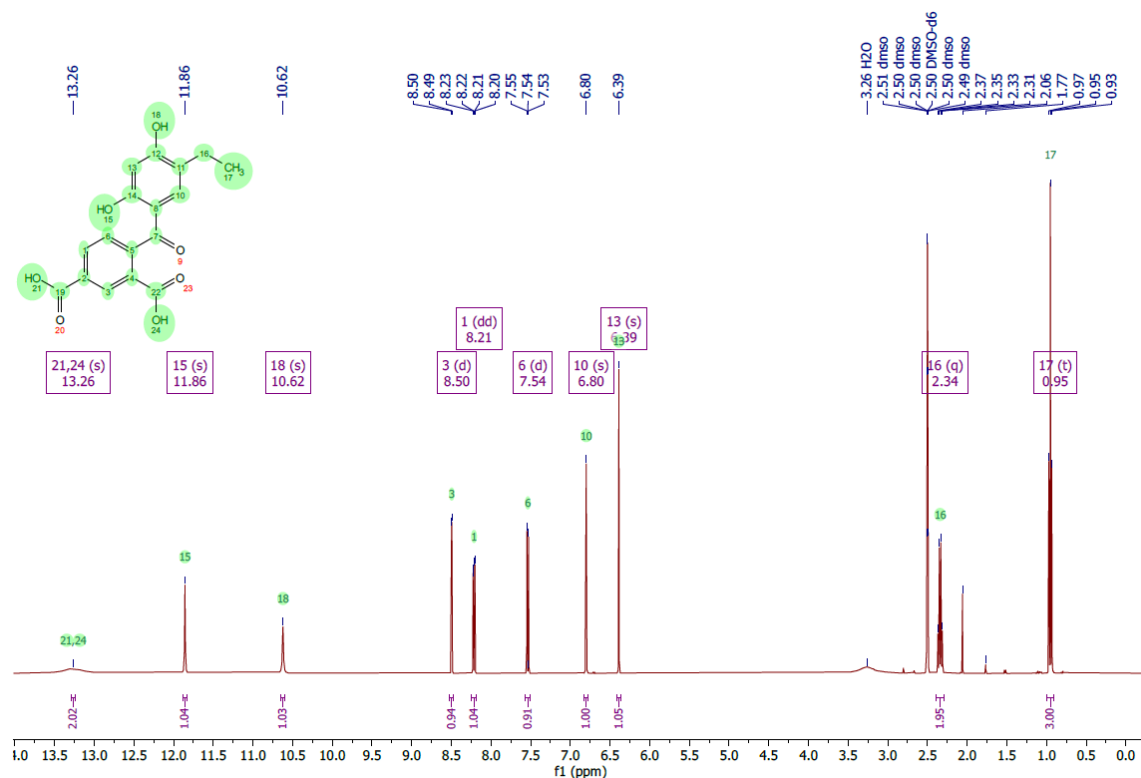

Fig. S24. <sup>1</sup>H NMR spectrum of **5** recorded at 400 MHz in DMSO-d<sub>6</sub>.

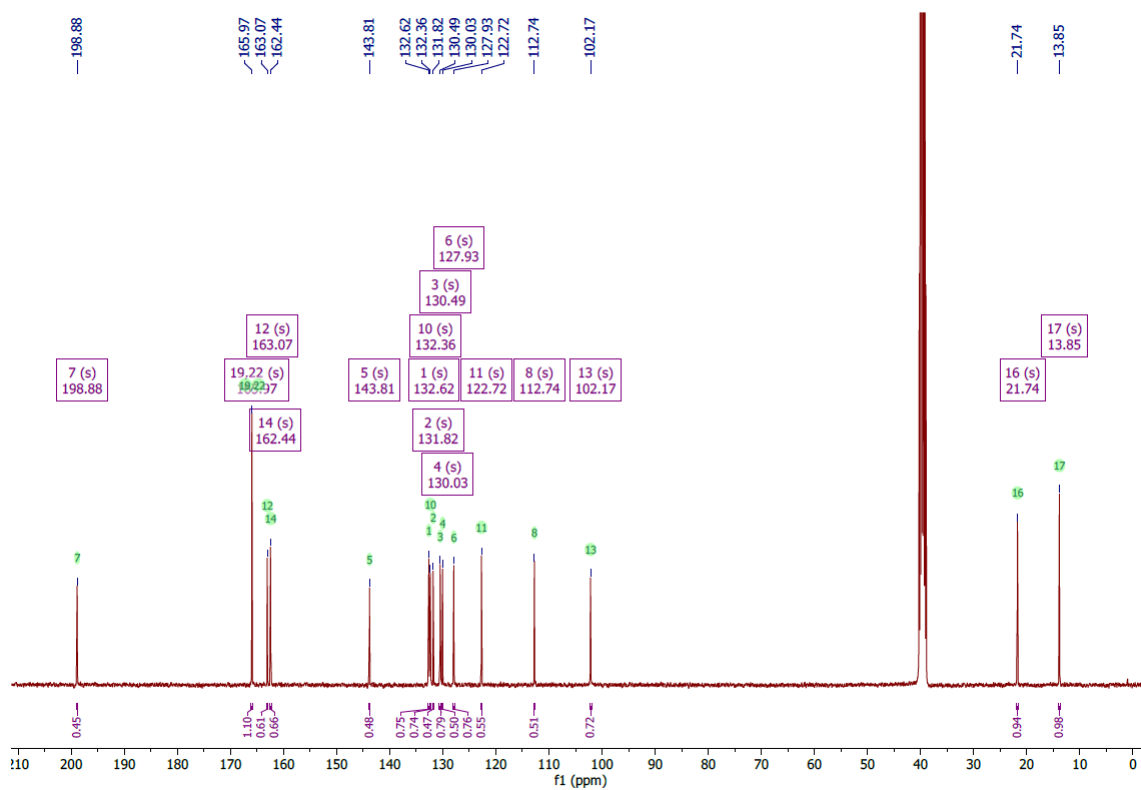

Fig. S25. <sup>13</sup>C NMR spectrum of **5** recorded at 101 MHz in DMSO-d<sub>6</sub>.



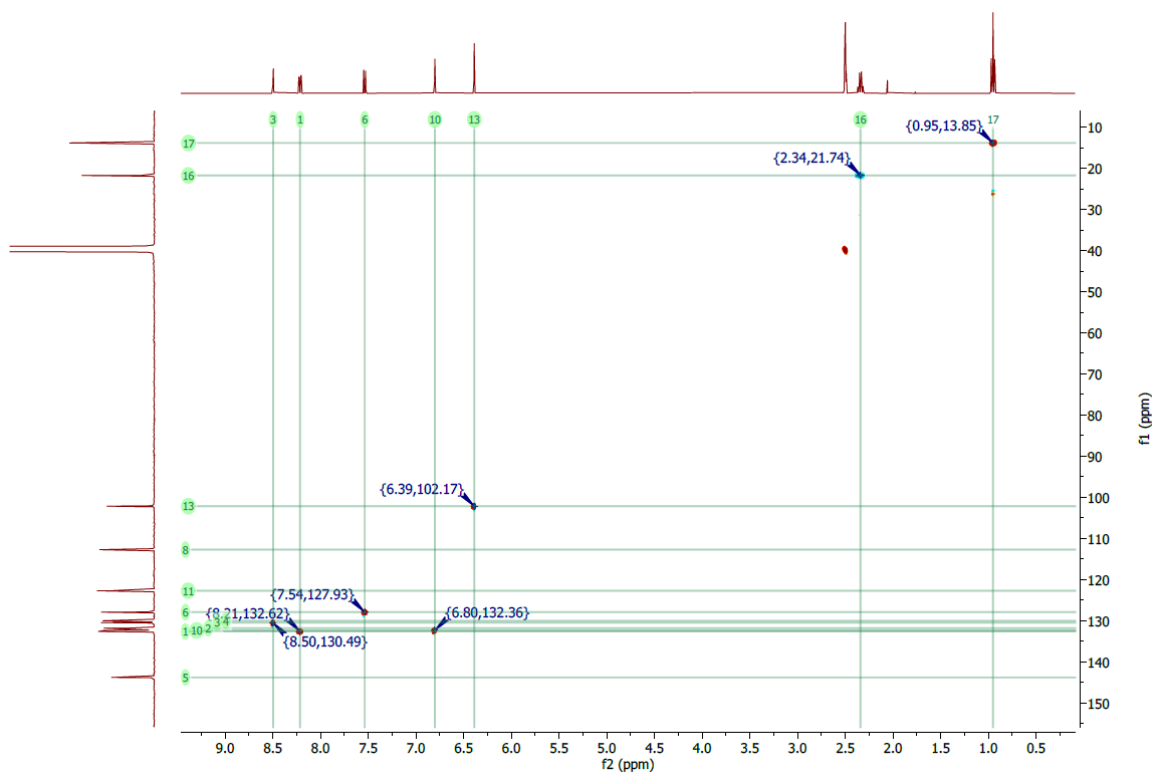

Fig. S26. HSQC spectrum of **5** recorded in DMSO-d<sub>6</sub>.

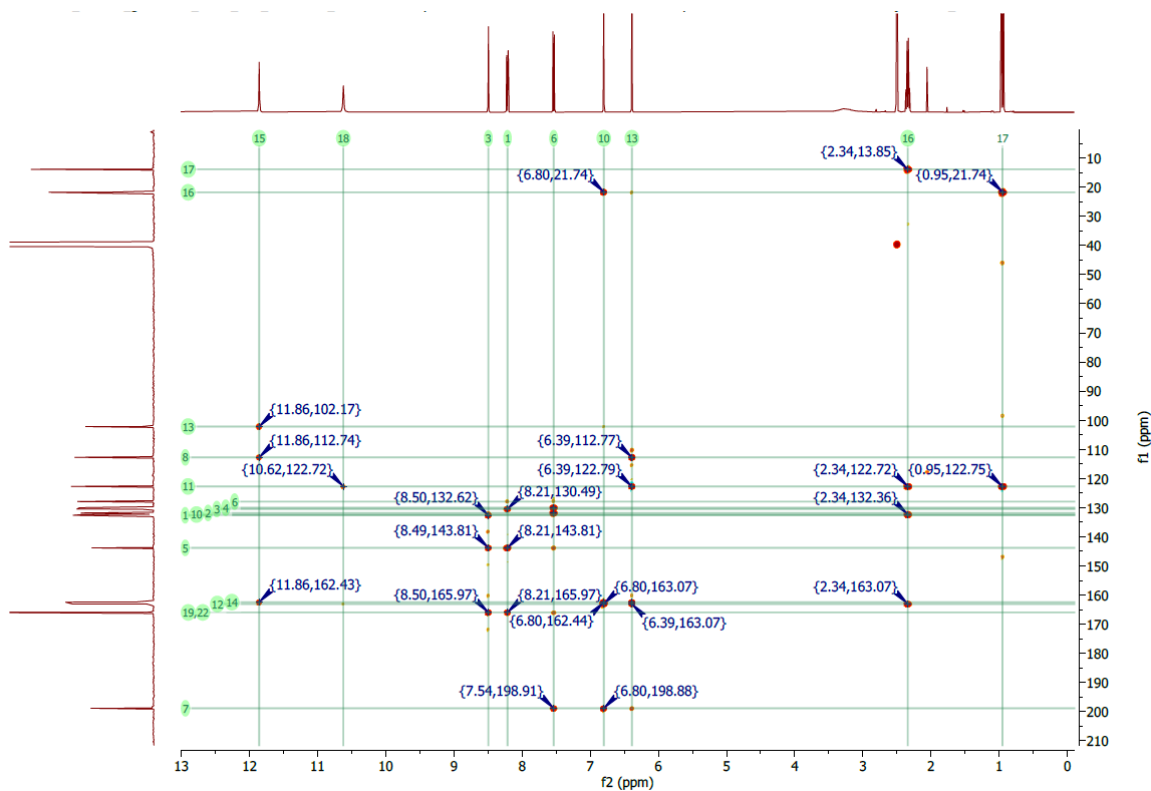

Fig. S27. HMBC spectrum of **5** recorded in DMSO-d<sub>6</sub>.

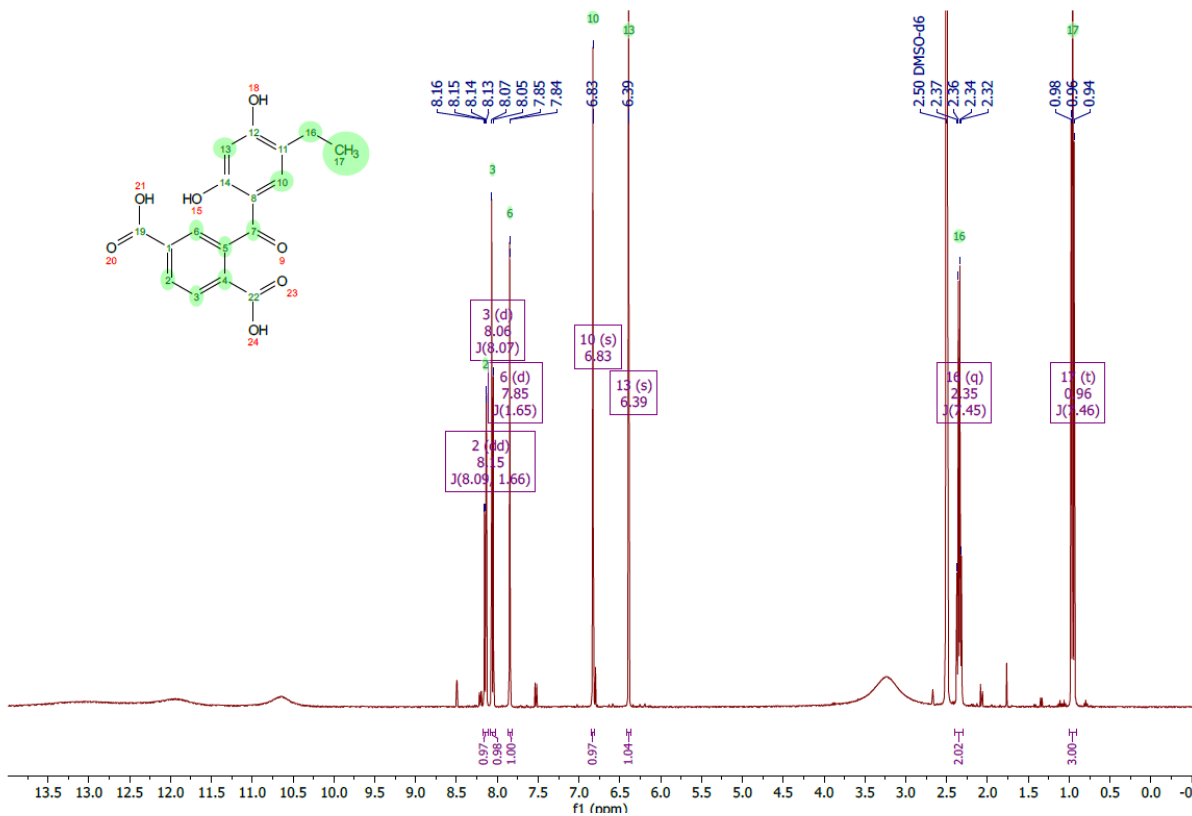

Fig. S28. <sup>1</sup>H NMR spectrum of **5<sub>co</sub>** recorded at 400 MHz in DMSO-d<sub>6</sub>.

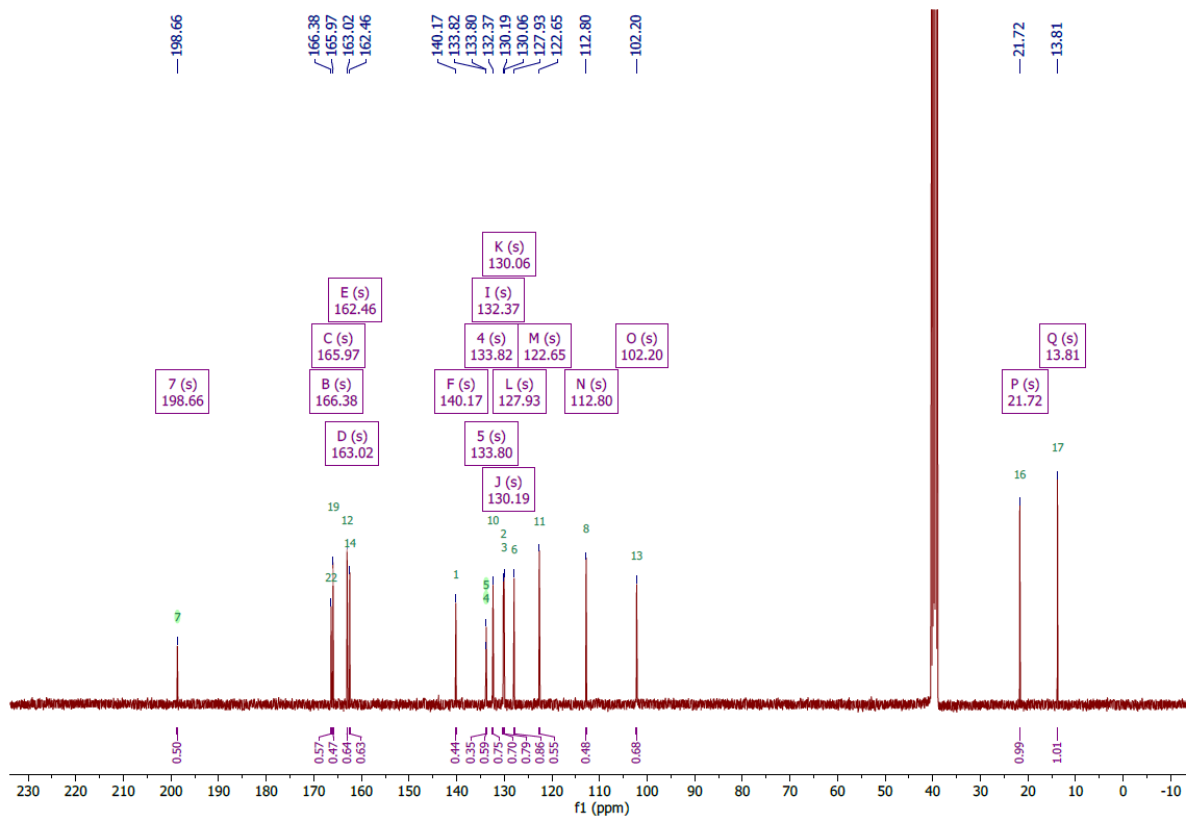

Fig. S29. <sup>13</sup>C NMR spectrum of **5<sub>co</sub>** recorded at 101 MHz in DMSO-d<sub>6</sub>.

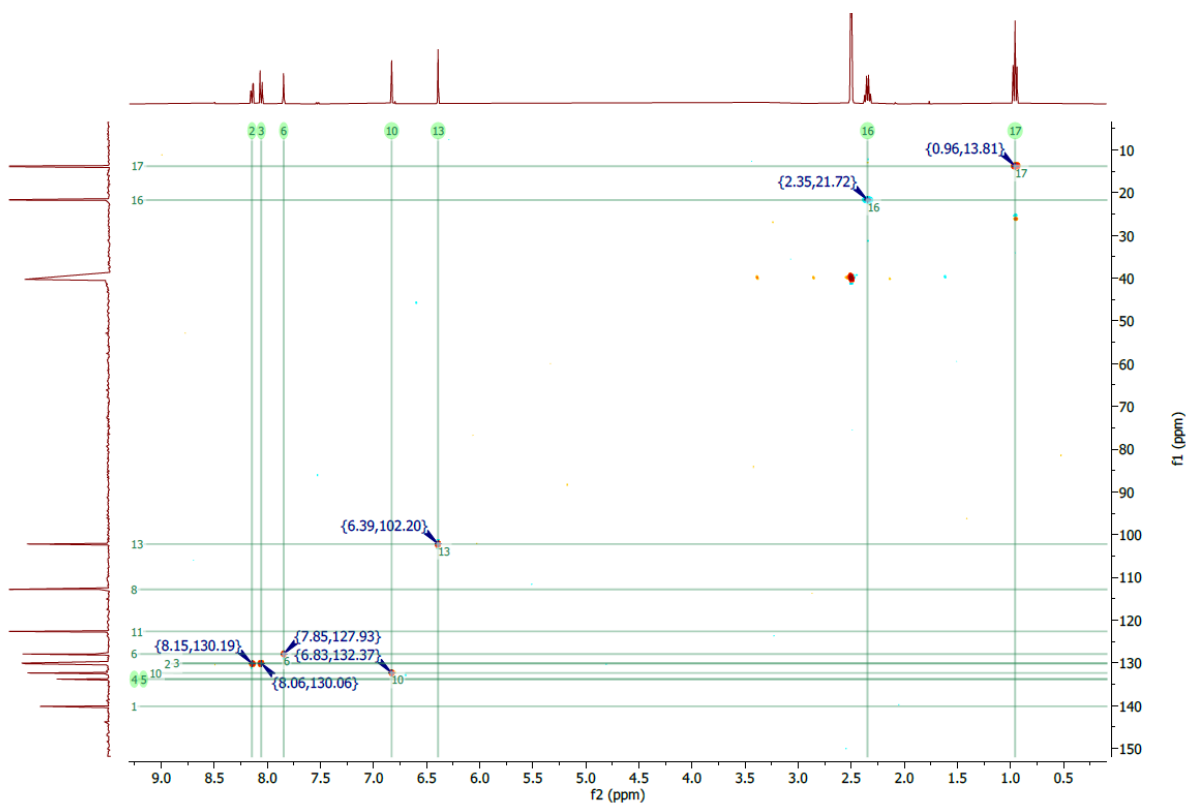

Fig. S30. HSQC spectrum of **5\_co** in DMSO-d<sub>6</sub>.

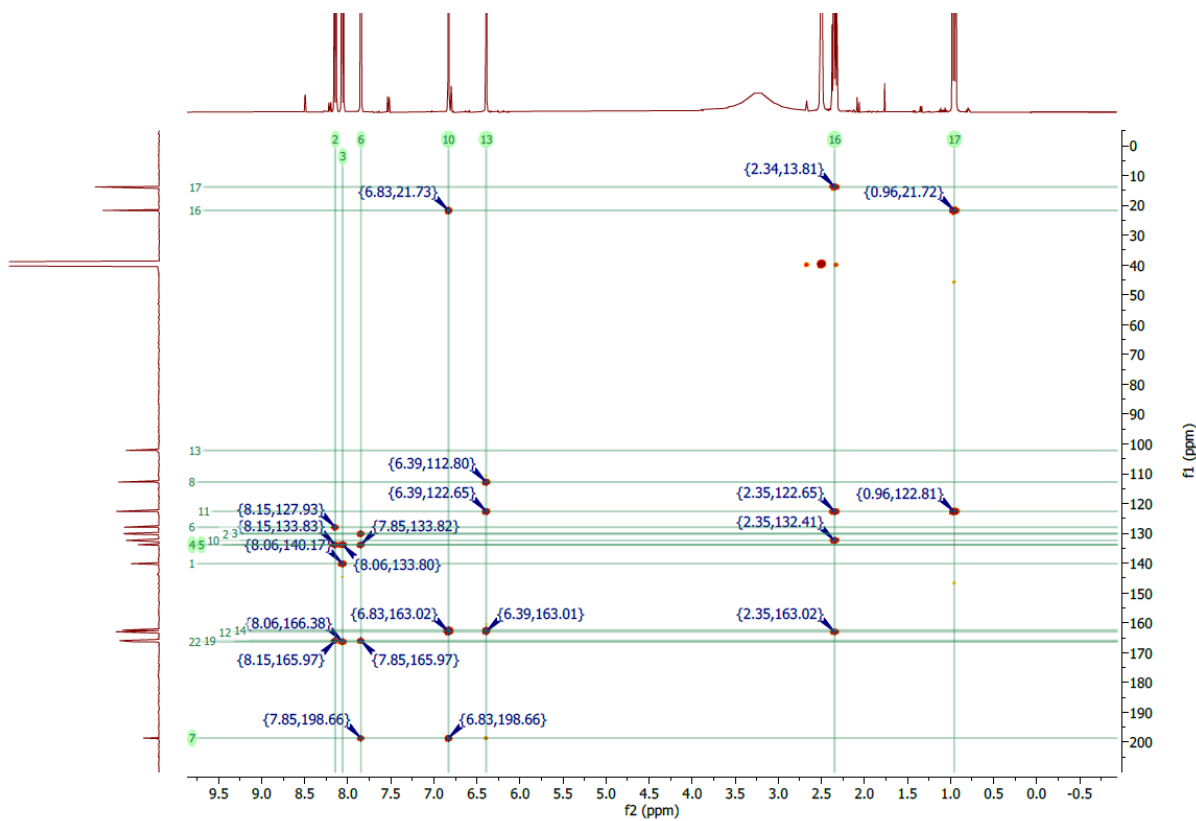

Fig. S31. HMBC spectrum of **5\_co** in DMSO-d<sub>6</sub>.

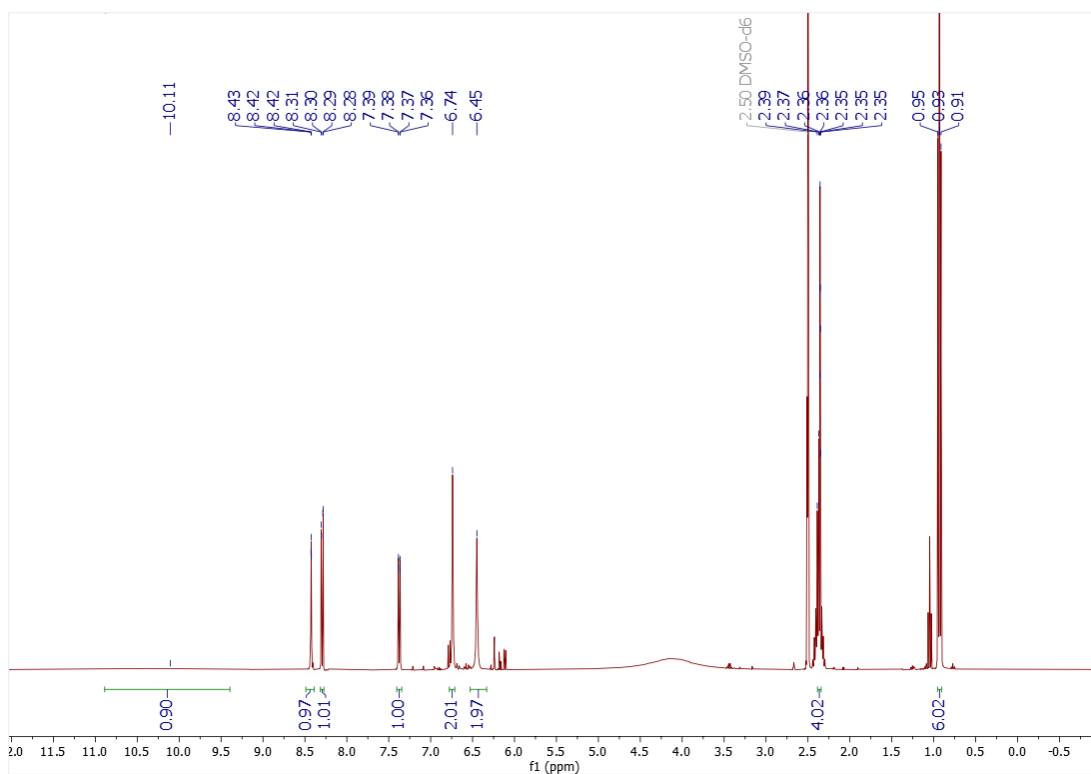

Fig. S32.  $^1\text{H}$  NMR spectrum of **6** recorded at 400 MHz in  $\text{DMSO-d}_6$ .

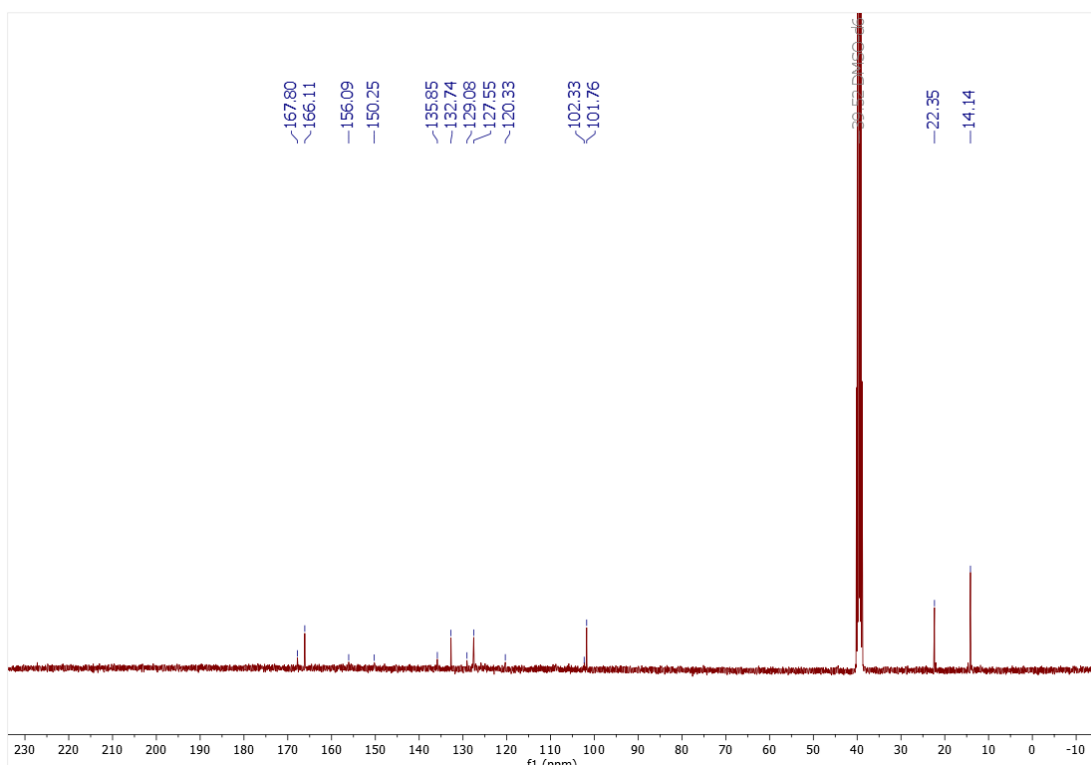

Fig. S33.  $^{13}\text{C}$  NMR spectrum of **6** recorded at 101 MHz in  $\text{DMSO-d}_6$ .

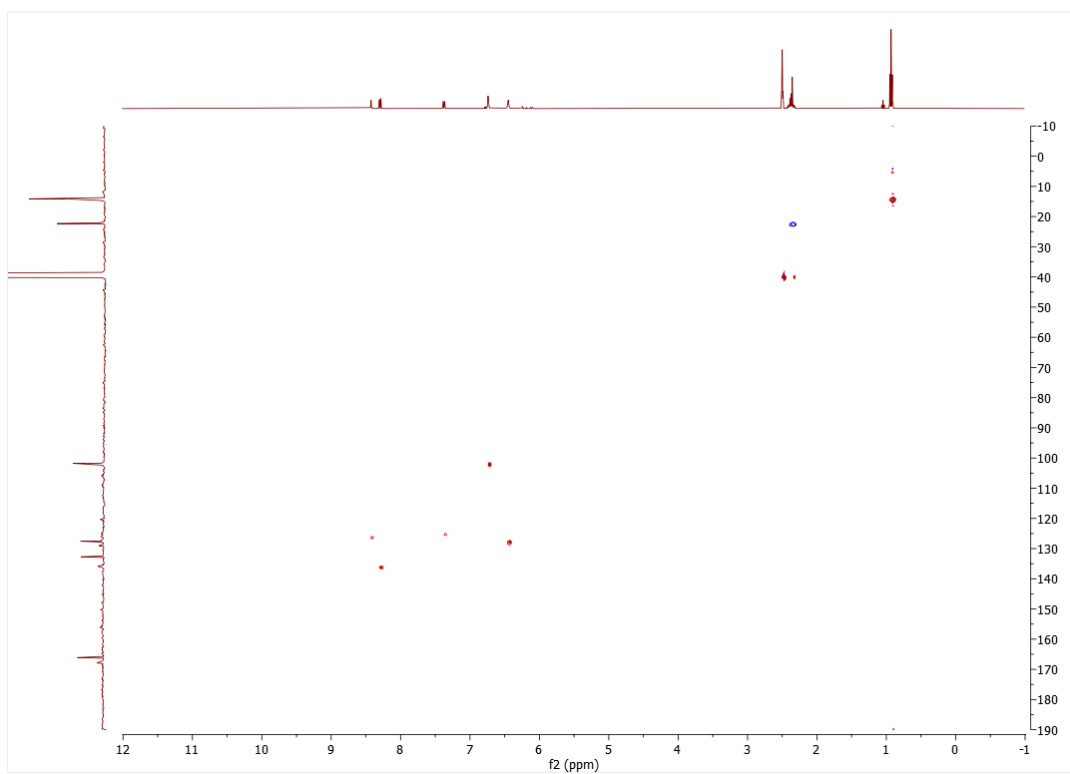

**Fig. S34.** HSQC spectrum of **6** recorded in DMSO-d<sub>6</sub>.

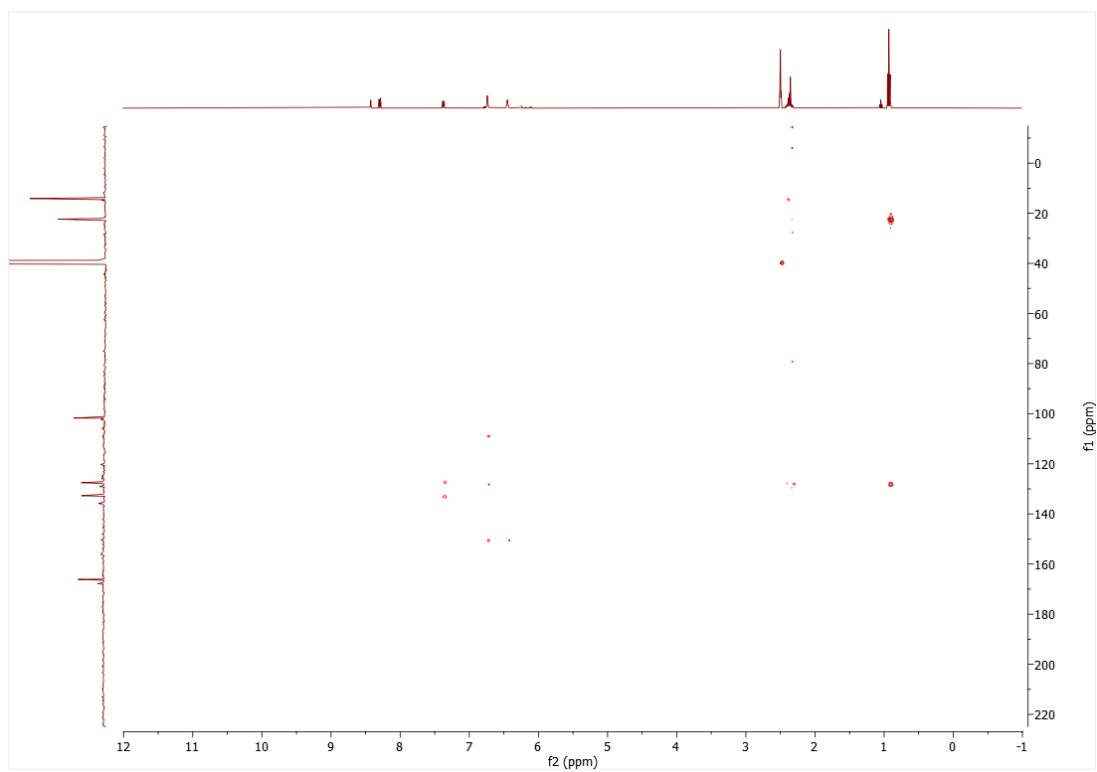

**Fig. S35.** HMBC spectrum of **6** recorded in DMSO-d<sub>6</sub>.

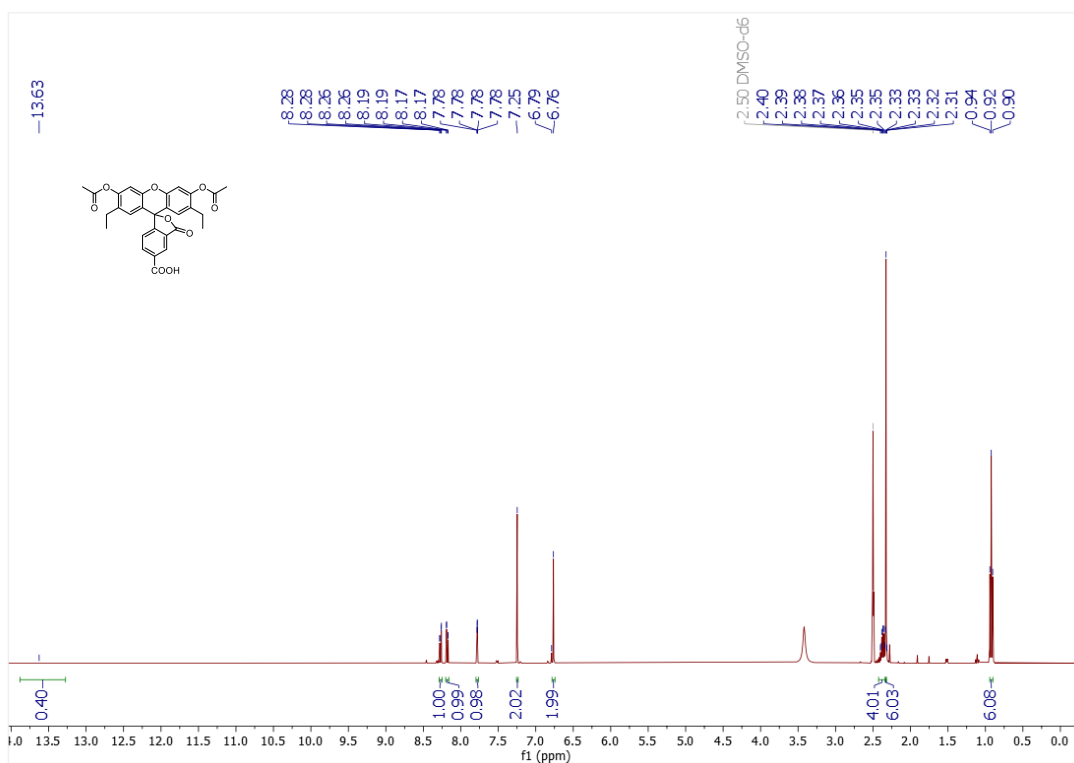

**Fig. S36.** <sup>1</sup>H NMR spectrum of **3** recorded at 400 MHz in DMSO-d<sub>6</sub>.

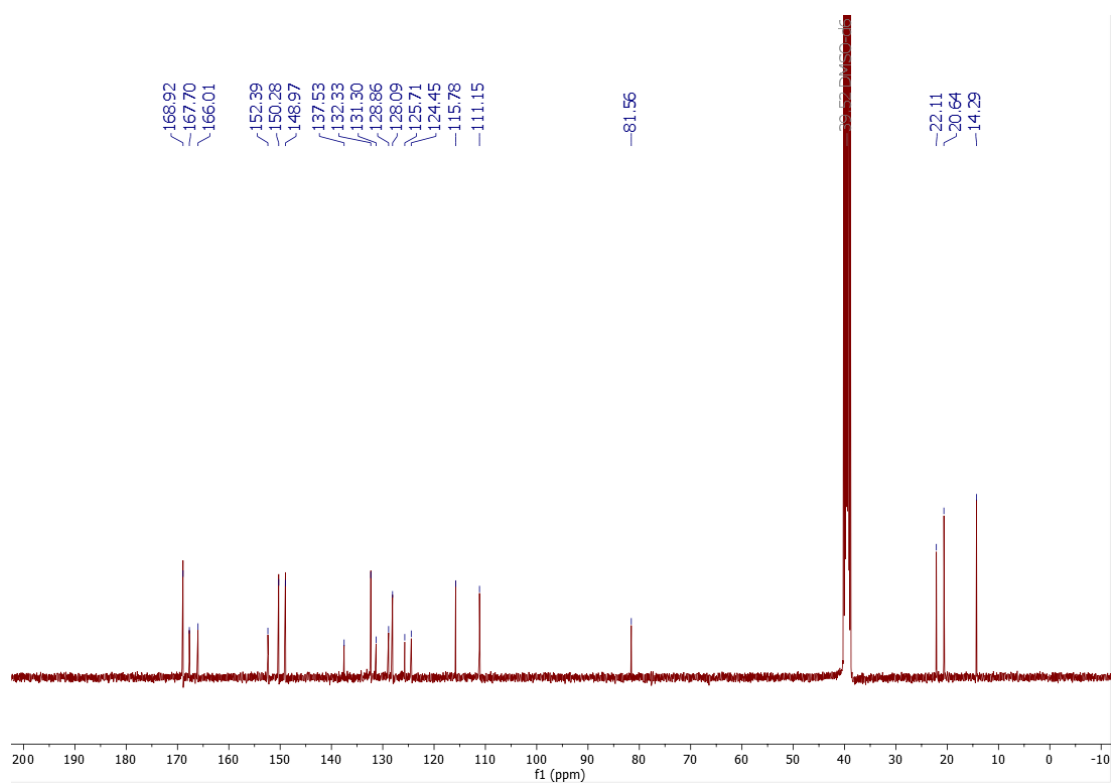

**Fig. S37.** <sup>13</sup>C NMR spectrum of **3** recorded at 101 MHz in DMSO-d<sub>6</sub>.

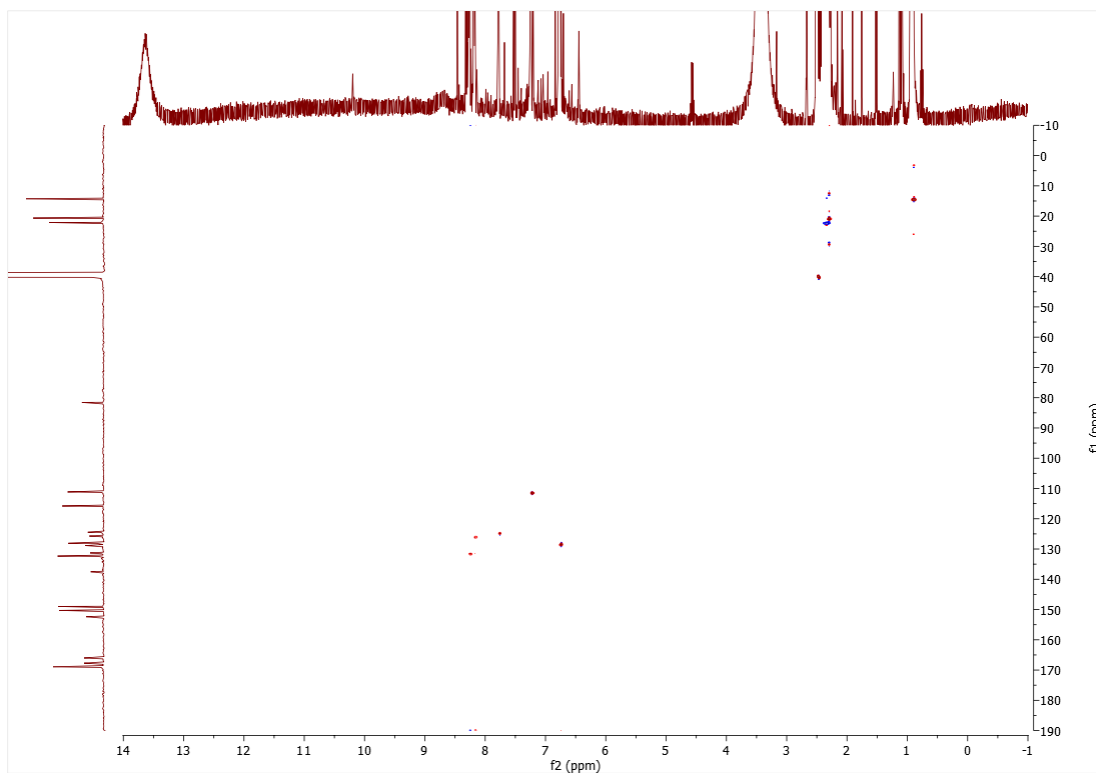

**Fig. S38.** HMBC spectrum of **3** recorded in DMSO-d<sub>6</sub>.

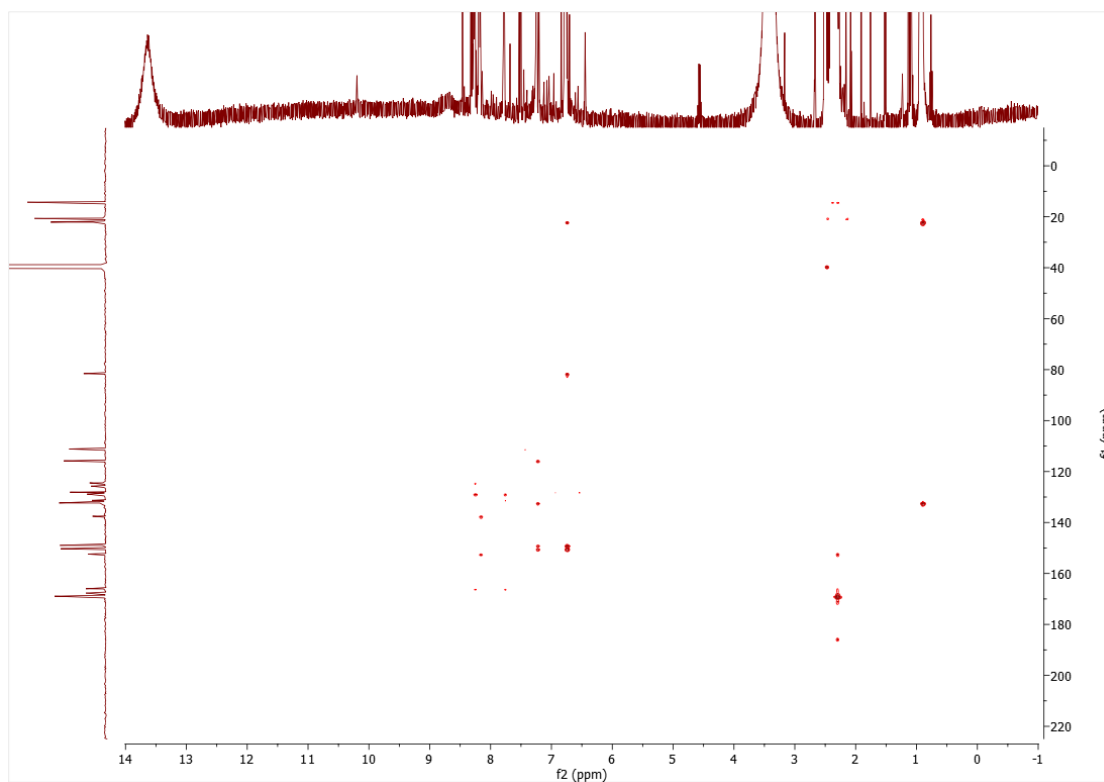

**Fig. S39.** HSQC spectrum of **3** recorded in DMSO-d<sub>6</sub>.

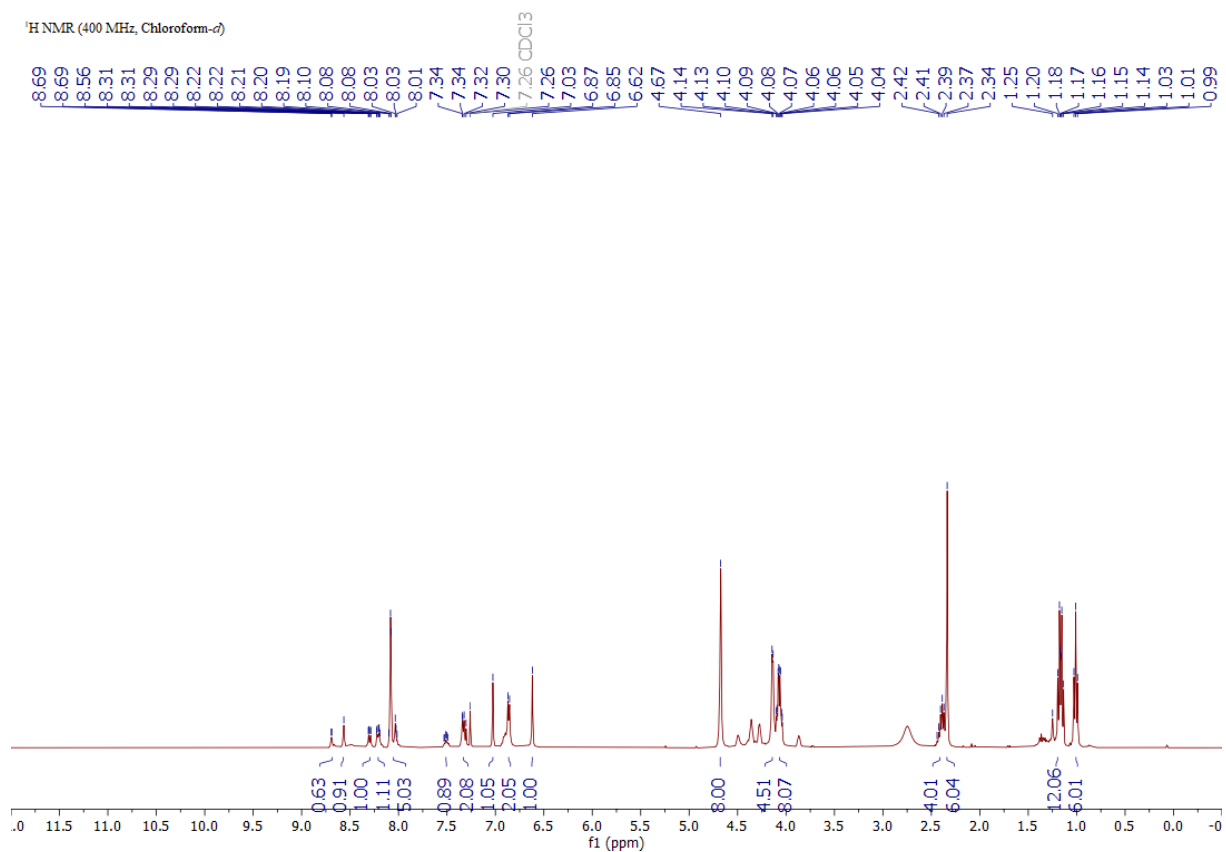

**Fig. S40.** <sup>1</sup>H NMR spectrum of **7** recorded at 400 MHz in CDCl<sub>3</sub>.

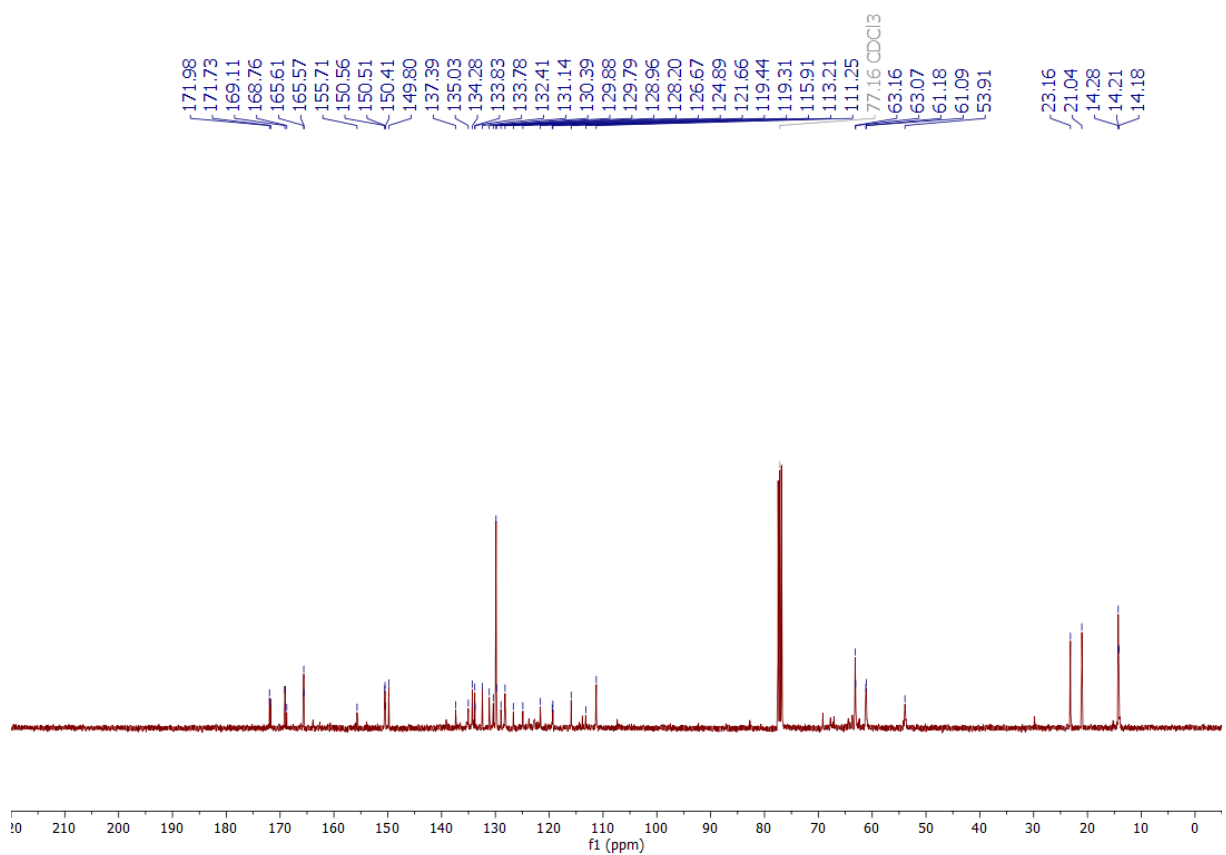

**Fig. S41.** <sup>13</sup>C NMR spectrum of **7** recorded at 101 MHz in CDCl<sub>3</sub>.



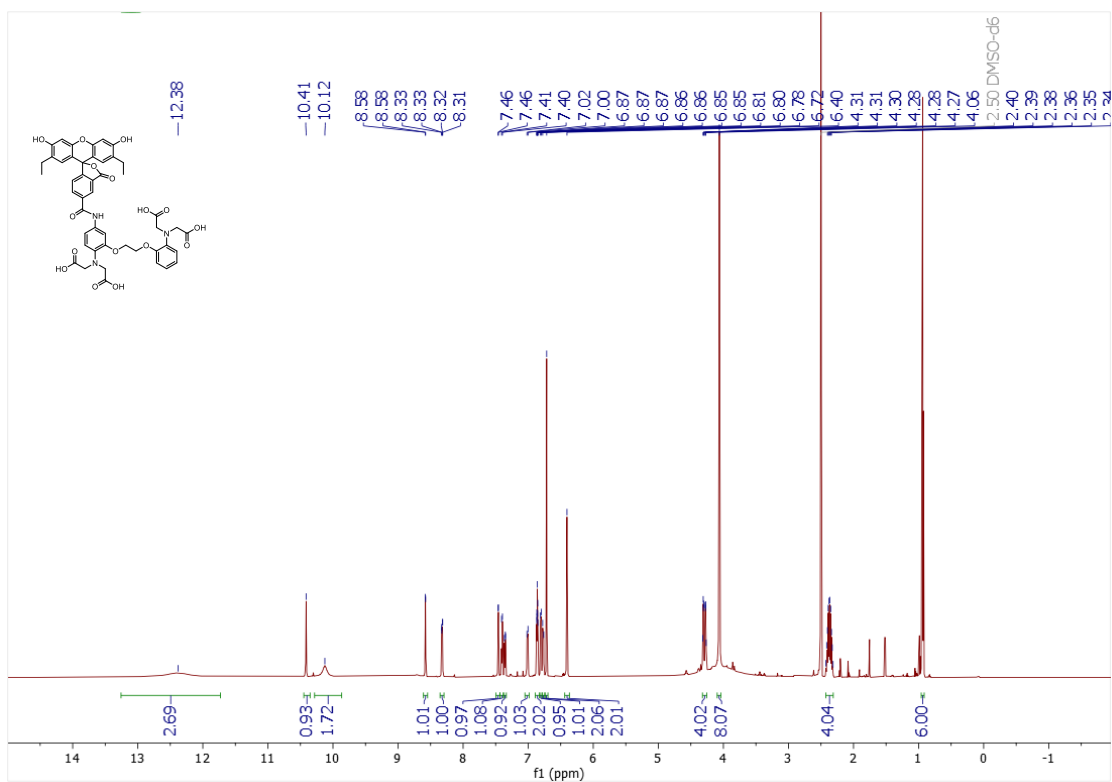

Fig. S42. <sup>1</sup>H NMR spectrum of **BEEF-CP** recorded at 600 MHz in DMSO-d<sub>6</sub>.

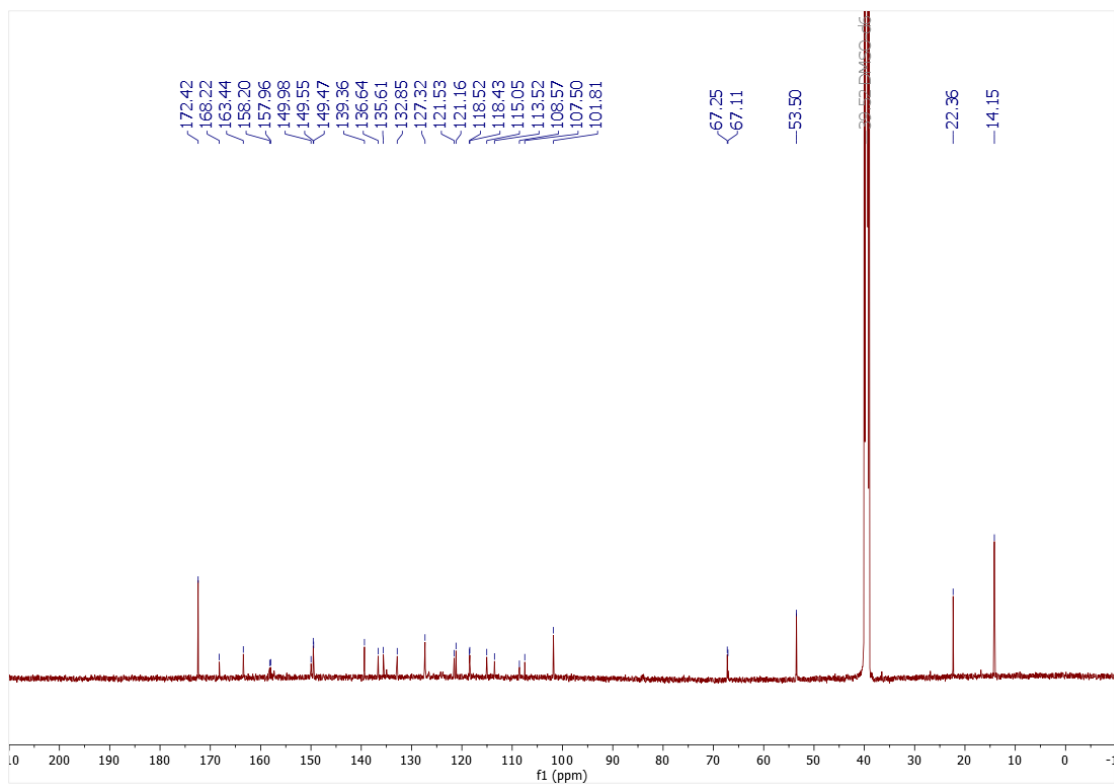

Fig. S43. <sup>13</sup>C NMR spectrum of **BEEF-CP** recorded at 151 MHz in DMSO-d<sub>6</sub>.

## Supplementary data references

---

- (1) Domokos, M.; Szalay, G.; Cseri, L.; Mucsi, Z.; Rózsa, B. J.; Kovács, E. Dataset S1 \_ Monitoring Correlates of SARS-CoV-2 Infection in Cell Culture Using Two-Photon Calcium Imaging. *Mendeley Data* **2022**, *VI*, doi: 10.17632/296576fp6h.1. <https://doi.org/10.17632/296576fp6h.1>.
- (2) Plaze, M.; Attali, D.; Prot, M.; Petit, A.-C.; Blatzer, M.; Vinckier, F.; Levillayer, L.; Chiaravalli, J.; Perin-Dureau, F.; Cachia, A.; Friedlander, G.; Chrétien, F.; Simon-Lorieri, E.; Gaillard, R. Inhibition of the Replication of SARS-CoV-2 in Human Cells by the FDA-Approved Drug Chlorpromazine. *Int. J. Antimicrob. Agents* **2021**, *57* (3), 106274. <https://doi.org/10.1016/j.ijantimicag.2020.106274>.
- (3) Clarisse, S.-B.; Melissa, T.; Ali, T.; S., O. N.; J., B. P.; K., N. D.; Ying, W.; S., H. P.; J., S. E.; J., van H. M. Suramin Inhibits SARS-CoV-2 Infection in Cell Culture by Interfering with Early Steps of the Replication Cycle. *Antimicrob. Agents Chemother.* **2020**, *64* (8), 10.1128/aac.00900-20. <https://doi.org/10.1128/aac.00900-20>.
- (4) Putlyaeva, L. V.; Lukyanov, K. A. Studying SARS-CoV-2 with Fluorescence Microscopy. *International Journal of Molecular Sciences*. 2021, p 6558. <https://doi.org/10.3390/ijms22126558>.
- (5) Lukose, J.; Chidangil, S.; George, S. D. Optical Technologies for the Detection of Viruses like COVID-19: Progress and Prospects. *Biosens. Bioelectron.* **2021**, *178*, 113004. <https://doi.org/10.1016/j.bios.2021.113004>.
- (6) Ju, X.; Zhu, Y.; Wang, Y.; Li, J.; Zhang, J.; Gong, M.; Ren, W.; Li, S.; Zhong, J.; Zhang, L.; Zhang, Q. C.; Zhang, R.; Ding, Q. A Novel Cell Culture System Modeling the SARS-CoV-2 Life Cycle. *PLoS Pathog.* **2021**, *17* (3), e1009439. <https://doi.org/10.1371/journal.ppat.1009439>.
- (7) Rato, S.; Golumbeanu, M.; Telenti, A.; Ciuffi, A. Exploring Viral Infection Using Single-Cell Sequencing. *Virus Res.* **2017**, *239*, 55–68. <https://doi.org/10.1016/j.virusres.2016.10.016>.
- (8) Csomos, A.; Kontra, B.; Jancsó, A.; Galbács, G.; Deme, R.; Kele, Z.; Rózsa, B. J.; Kovács, E.; Mucsi, Z. A Comprehensive Study of the Ca<sup>2+</sup> Ion Binding of Fluorescently Labelled BAPTA Analogues. *Eur. J. Org. Chem.* **2021**, *2021* (37), 5248–5261. <https://doi.org/10.1002/ejoc.202100948>.
- (9) Csomos, A.; Kontra, B.; Jancsó, A.; Galbács, G.; Deme, R.; Kele, Z.; Rózsa, B. J.; Kovács, E.; Mucsi, Z. A Comprehensive Study of the Ca<sup>2+</sup> Ion Binding of Fluorescently Labelled BAPTA Analogues. *Eur. J. Org. Chem.* **2021**, *2021* (37), 5248–5261. <https://doi.org/10.1002/ejoc.202100948>.
- (10) Lakowicz Joseph R. Effects of Solvents on Fluorescence Emission Spectra. In *Principles of Fluorescence Spectroscopy*; Springer: Boston, 2006; pp 187–215. <https://doi.org/https://doi.org/10.1007/978-0-387-46312-4>.
- (11) Tsien, R.; Pozzan, T. T. Measurement of Cytosolic Free Ca<sup>2+</sup> with Quin<sub>2</sub>. *Methods Enzymol.* **1989**, *172* (C), 230–262. [https://doi.org/10.1016/S0076-6879\(89\)72017-6](https://doi.org/10.1016/S0076-6879(89)72017-6).
- (12) Chelators, Calibration Buffers, Ionophores and Cell-Loading Reagents. In *The Molecular Probes® Handbook - A Guide to Fluorescent Probes and Labeling Technologies 11th Edition*; 2010.
- (13) Xu, C.; Webb, W. W. Measurement of Two-Photon Excitation Cross Sections of Molecular Fluorophores with Data from 690 to 1050 Nm. *J. Opt. Soc. Am. B* **1996**, *13* (3), 481–491. <https://doi.org/10.1364/JOSAB.13.000481>.
- (14) Makarov, N. S.; Drobizhev, M.; Rebane, A. Two-Photon Absorption Standards in the 550–1600 Nm Excitation Wavelength Range. *Opt. Express* **2008**, *16* (6), 4029–4047. <https://doi.org/10.1364/OE.16.004029>.
- (15) Makarov, N. S.; Drobizhev, M.; Rebane, A. Two-Photon Absorption Standards in the 550-1600 Nm Excitation Wavelength Range. *Opt. Express* **2008**, *16* (6), 4029. <https://doi.org/10.1364/oe.16.004029>.
